# Supplementary material for: Retro-Cope elimination of cyclic alkynes: reactivity trends and rational design of next-generation bioorthogonal reagents
Source: Royal Society of Chemistry journal article supplement (doi:10.1039/d4sc04211e), 2024-01-01
Supplement: d4sc04211e1.pdf [file d4sc04211e1.pdf]

## Retro-Cope Elimination of Cyclic Alkynes: Reactivity Trends and Rational Design of Next-Generation Bioorthogonal Reagents

Steven E. Beutick,<sup>+,a,b</sup> Song Yu,<sup>+,a</sup> Laura Orian,<sup>b</sup> F. M. Bickelhaupt,<sup>a,c,d</sup> Trevor A. Hamlin<sup>\*a</sup>

<sup>a</sup> S. E. Beutick, Dr. S. Yu, Prof. Dr. F. M. Bickelhaupt, Dr. T. A. Hamlin,  
Department of Chemistry and Pharmaceutical Sciences, Amsterdam Institute of Molecular and Life Sciences (AIMMS), Vrije Universiteit Amsterdam, De Boelelaan 1108, 1081 HZ Amsterdam, The Netherlands.

E-mail: t.a.hamlin@vu.nl

<sup>b</sup> S. E. Beutick, Prof. Dr. L. Orian  
Dipartimento di Scienze Chimiche, Università degli Studi di Padova, Via Marzolo 1, 35129 Padova, Italy.

<sup>c</sup> Prof. Dr. F. M. Bickelhaupt  
Institute of Molecules and Materials, Radboud University, Heyendaalseweg 135, 6525 AJ Nijmegen, The Netherlands.

<sup>d</sup> Prof. Dr. F. M. Bickelhaupt  
Department of Chemical Sciences, University of Johannesburg, Auckland Park, Johannesburg 2006, South Africa.

<sup>+</sup> These authors contributed equally to this work

### Contents

#### Example input file

**Fig. S1.** The optimized structures of (cyclo)alkynes and **DMHA** which are the studied reagents in the retro-Cope reaction computed at ZORA-BP86/TZ2P.

**Fig. S2.** Transition state structures for the retro-Cope reactions of 2-butyne and the studied cyclic octynes with **DMHA** along *anti*-pathways, computed at ZORA-BP86/TZ2P.

**Table S1.** Energies relative to reactants of the reactant complex  $\Delta E_{\text{RC}}$  (kcal mol<sup>-1</sup>), transition state  $\Delta E^{\ddagger}$  (kcal mol<sup>-1</sup>), and product  $\Delta E_{\text{rxn}}$  (kcal mol<sup>-1</sup>) for the retro-Cope reactions of propyne, 2-butyne and the original cyclooctyne **OCT** and functionalized cyclooctynes with along *anti*- and *syn*-pathways.<sup>[a]</sup>

**Table S2.** Gibbs free energies relative to reactants of the reactant complex  $\Delta G_{\text{RC}}$  (kcal mol<sup>-1</sup>), transition state  $\Delta G^{\ddagger}$  (kcal mol<sup>-1</sup>), and product  $\Delta G_{\text{rxn}}$  (kcal mol<sup>-1</sup>) for the retro-Cope reactions of propyne, 2-butyne and the original cyclooctyne **OCT** and functionalized cyclooctynes with along *anti*- and *syn*-pathways.<sup>[a]</sup>

**Table S3.** Activation energies  $\Delta E^\ddagger$  (kcal mol<sup>-1</sup>) for the retro-Cope reactions of propyne, 2-butyne and the original cyclooctyne **OCT** and functionalized cyclooctynes with **DMHA** along *anti*-pathways, computed at various levels of theory.

**Fig. S3.** a) Activation strain model and b) decomposition of strain energies for the retro-Cope reactions of 2-butyne and **COT** with **DMHA**. Transition states are indicated by dots. The energy terms along the IRC are projected on the length of the newly forming C $\cdots$ H bond and the vertical dotted line indicates the point at which the length of the C $\cdots$ H bond is 1.45 Å. c) Schematic diagrams with LUMO energies, energy gaps  $\Delta\varepsilon$ , overlaps *S*, and values of  $S^2/\Delta\varepsilon$  term associated with the key donor–acceptor interaction between HOMO<sub>DMHA</sub>–LUMO<sub>alkyne</sub> along with the retro-Cope reactions between 2-butyne and **COT** with **DMHA**. All were computed at ZORA-BP86/TZ2P.

**Fig. S4.** A schematic representation of the formula that decomposes the change in orbital energies into a) a deformation ( $\Delta\varepsilon_{\text{deform}}$ ) and b) a substituent ( $\Delta\varepsilon_{\text{sub}}$ ) contribution. c) The  $\pi$ -HOMO and  $\pi^*$ -LUMO energies (eV) for the cyclic alkynes in their equilibrium geometry ( $\varepsilon_{\text{alkyne}}$ ) and the  $\pi$ -HOMO and  $\pi^*$ -LUMO energies for cyclooctyne constrained in the equilibrium geometry of the alkynes. d) The  $\pi^*$ -LUMO energies (eV) of the alkyne fragment associated with the retro-Cope reaction between strained alkynes and **DMHA** projected on the length of the newly forming C $\cdots$ H bond. The TSs are indicated by dots. Computed at ZORA-BP86/TZ2P.

**Fig. S5.** Heatmaps for computed values of  $S^2/\Delta\varepsilon$  associated with the donor–acceptor interactions along with the retro-Cope reactions of a) **COT**, b) **DIBO**, and c) **BCN** with **DMHA** at the consistent geometries where the length of C $\cdots$ H bond is 1.50 Å. All were computed at ZORA-BP86/TZ2P.

**Table S4.** The energy decomposition analysis (in kcal mol<sup>-1</sup>) of the retro-Cope reactions of the original **COT** and **DIBO** with **DMHA** at various consistent and double consistent geometries.

**Fig. S6.** Heatmaps for closed-shell orbital overlaps, *S*, between the filled FMOs of **DMHA** with the filled FMOs of a) **DIBO** at consistent geometry where C $\cdots$ H bond is 1.50 Å and b) **DIBO** in a double consistent geometry associated with the retro-Cope reactions along the *anti*-pathways. Computed at ZORA-BP86/TZ2P.

**Fig. S7.** The HOMO orbitals in **DIBO** that increase in Pauli repulsive overlap between the in-plane orbitals of **DMHA** going from CG to DCG at a C $\cdots$ H bond distance of 1.50 Å.

**Fig. S8.** Heatmaps for computed values of  $S^2/\Delta\varepsilon$  associated with the donor–acceptor interactions along with the retro-Cope reactions of a) **COT**, b) **HO-COT**, and c) **DIFO** with **DMHA** along the *anti*-pathways at the consistent geometries where the length of C $\cdots$ H bond is 1.56 Å. All were computed at ZORA-BP86/TZ2P.

**Table S5.** The energy decomposition analysis (in kcal mol<sup>-1</sup>) of the retro-Cope reactions of the original **COT**, **HO-COT** and **DIFO** with **DMHA** at various consistent and double consistent geometries.

**Table S5.** The energy decomposition analysis (in kcal mol<sup>-1</sup>) of the retro-Cope reactions of the original **COT**, **HO-COT** and **DIFO** with **DMHA** at various consistent and double consistent geometries.

**Fig. S9.** a) Activation strain model, b) energy decomposition analyses and c) decomposition of strain energies for the retro-Cope reactions of **COT**, **N-COT**, **O-COT** and **S-COT** with **DMHA**. Transition states are indicated by dots. The energy terms along the IRC are projected on the length of the newly forming C···H bond and the vertical dotted line indicates the point at which the length of the C···H bond is 1.56 Å. All were computed at ZORA-BP86/TZ2P.

**Table S6.** The structural deformation of key angles (in °) and bonds distances (in Å) from equilibrium geometries to consistent geometries, where the lengths of the C···H bond are 1.56 Å, associated with the retro-Cope reactions of **COT**, **N-COT**, **O-COT** and **S-COT** with **DMHA** along the *anti*-pathways. Computed at ZORA-BP86/TZ2P.

**Fig. S10.** Heatmaps for computed values of  $S^2/\Delta\varepsilon$  associated with the donor–acceptor interactions along with the retro-Cope reactions of a) **COT**, b) **N-COT**, c) **O-COT** and d) **S-COT** with **DMHA** along the *anti*-pathways at the consistent geometries where the length of C···H bond is 1.56 Å. All were computed at ZORA-BP86/TZ2P.

**Table S7.** The energy decomposition analysis (in kcal mol<sup>-1</sup>) of the retro-Cope reactions of the original **COT**, **N-COT** and **O-COT** with **DMHA** at various consistent and double consistent geometries.

**Table S8.** The total electronic energies (kcal mol<sup>-1</sup>), enthalpies (kcal mol<sup>-1</sup>), Gibbs free energies (kcal mol<sup>-1</sup>) relative to the spherical average-of-configuration atoms, the number of imaginary vibrational frequencies (and their wavelength), and cartesian coordinates (Å), for all stationary points (reactant complex RC, transition state TS, product P), computed at ZORA-BP86/TZ2P using AMS2021.

## Example input file

Task GeometryOptimization

System

Atoms

[cartesian coordinates (Å)]

End

End

GeometryOptimization

MaxIterations 199

Convergence

Gradients 1e-05

Energy 1e-05

End

End

Properties

NormalModes Yes

End

NormalModes

Hessian Analytical

ReScanFreqRange -1000 10.0

End

Engine ADF

Basis

Type TZ2P

Core None

End

XC

GGA BP86

End

NumericalQuality VeryGood

SCF

Iterations 199

Converge 1e-05

End

EndEngine

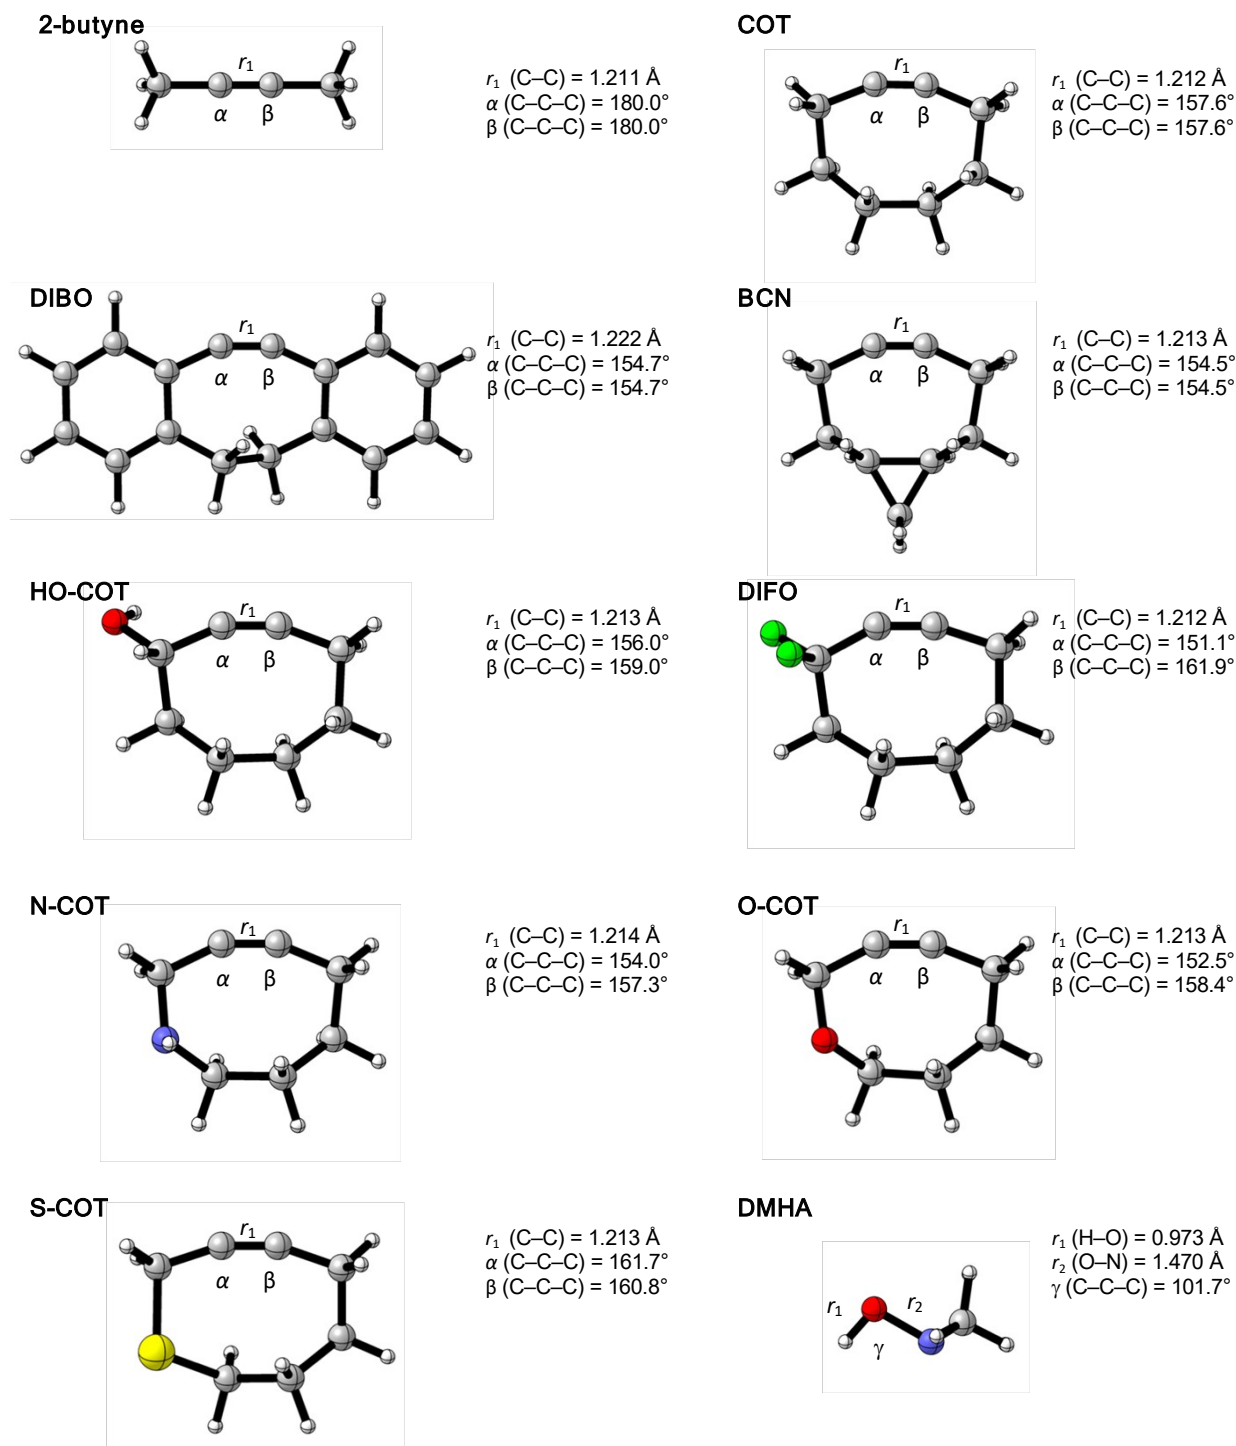

**Fig. S1.** The optimized structures of (cyclo)alkynes and **DMHA** which are the studied reagents in the retro-Cope reaction computed at ZORA-BP86/TZ2P.

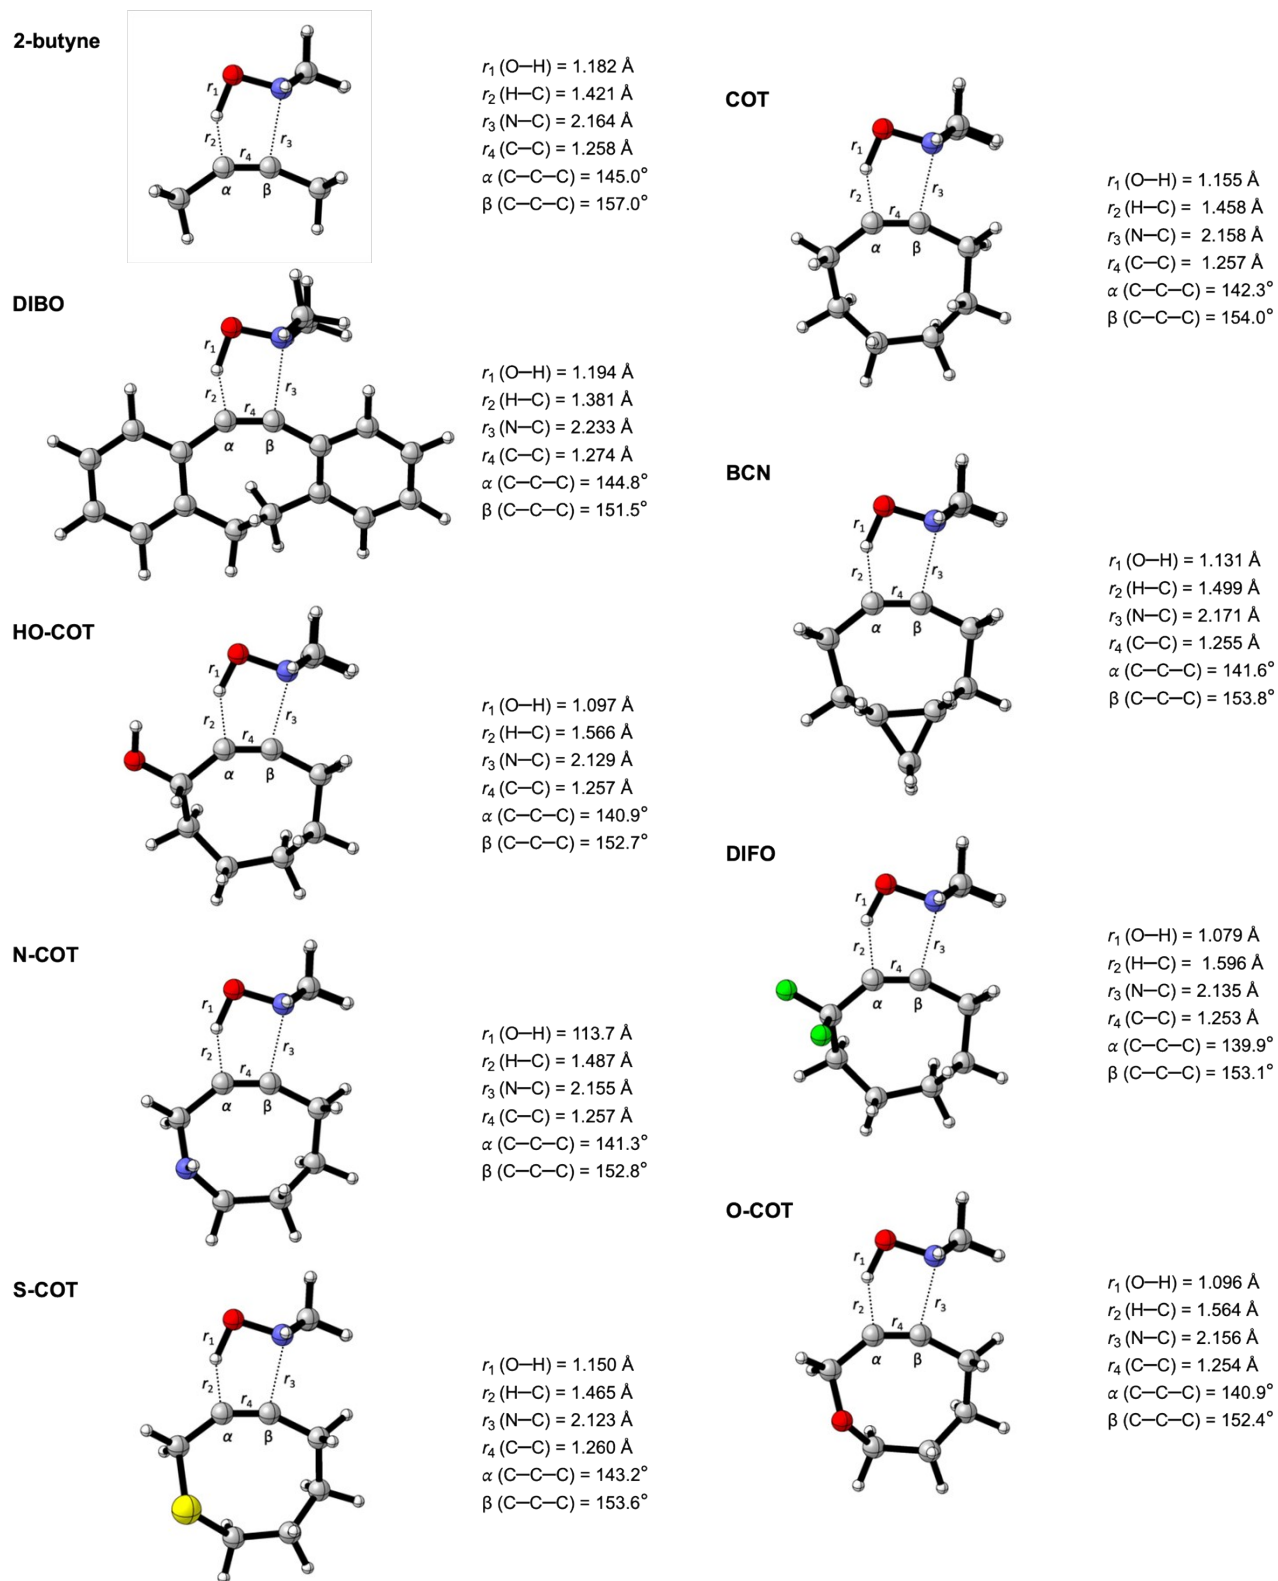

**Fig. S2.** Transition state structures for the retro-Cope reactions of 2-butyne and the studied cyclic octynes with DMHA along *anti*-pathways, computed at ZORA-BP86/TZ2P.

**Table S1.** Energies relative to reactants of the reactant complex  $\Delta E_{\text{RC}}$  (kcal mol<sup>-1</sup>), transition state  $\Delta E^{\ddagger}$  (kcal mol<sup>-1</sup>), and product  $\Delta E_{\text{rxn}}$  (kcal mol<sup>-1</sup>) for the retro-Cope reactions of propyne, 2-butyne and the original cyclooctyne **OCT** and functionalized cyclooctynes with along *anti*- and *syn*-pathways.<sup>[a]</sup>

| Alkyne          | <i>anti</i>            |                       |                         | <i>syn</i>             |                       |                         |
|-----------------|------------------------|-----------------------|-------------------------|------------------------|-----------------------|-------------------------|
|                 | $\Delta E_{\text{RC}}$ | $\Delta E^{\ddagger}$ | $\Delta E_{\text{rxn}}$ | $\Delta E_{\text{RC}}$ | $\Delta E^{\ddagger}$ | $\Delta E_{\text{rxn}}$ |
| <b>Propyne</b>  | -2.83                  | 13.42                 | -12.94                  | -2.75                  | 11.79                 | -10.92                  |
| <b>2-butyne</b> | -3.01                  | 15.81                 | -6.93                   | —                      | —                     | —                       |
| <b>COT</b>      | -3.01                  | 4.59                  | -14.33                  | —                      | —                     | —                       |
| <b>DIBO</b>     | -2.65                  | 4.06                  | -9.37                   | —                      | —                     | —                       |
| <b>BCN</b>      | -3.10                  | 2.11                  | -12.73                  | —                      | —                     | —                       |
| <b>HO-COT</b>   | -4.93                  | 2.31                  | -15.31                  | -8.86                  | 6.82                  | -10.97                  |
| <b>DIFO</b>     | -2.11                  | 0.21                  | -15.94                  | -1.59                  | 1.65                  | -14.43                  |
| <b>N-COT</b>    | -2.94                  | 2.89                  | -15.77                  | -4.34                  | 3.30                  | -15.63                  |
| <b>O-COT</b>    | -2.66                  | 0.99                  | -19.52                  | -2.76                  | 2.79                  | -18.09                  |
| <b>S-COT</b>    | -2.72                  | 5.84                  | -13.37                  | -2.93                  | 6.02                  | -16.05                  |

[a] Computed at ZORA-BP86/TZ2P.

**Table S2.** Gibbs free energies relative to reactants of the reactant complex  $\Delta G_{\text{RC}}$  (kcal mol<sup>-1</sup>), transition state  $\Delta G^{\ddagger}$  (kcal mol<sup>-1</sup>), and product  $\Delta G_{\text{rxn}}$  (kcal mol<sup>-1</sup>) for the retro-Cope reactions of propyne, 2-butyne and the original cyclooctyne **OCT** and functionalized cyclooctynes with along *anti*- and *syn*-pathways.<sup>[a]</sup>

| Alkyne          | <i>anti</i>            |                       |                         | <i>syn</i>             |                       |                         |
|-----------------|------------------------|-----------------------|-------------------------|------------------------|-----------------------|-------------------------|
|                 | $\Delta G_{\text{RC}}$ | $\Delta G^{\ddagger}$ | $\Delta G_{\text{rxn}}$ | $\Delta G_{\text{RC}}$ | $\Delta G^{\ddagger}$ | $\Delta G_{\text{rxn}}$ |
| <b>Propyne</b>  | 5.69                   | 24.73                 | 2.73                    | 7.80                   | 22.97                 | 4.67                    |
| <b>2-butyne</b> | 7.93                   | 26.67                 | 8.33                    | —                      | —                     | —                       |
| <b>COT</b>      | 8.66                   | 15.84                 | 2.17                    | —                      | —                     | —                       |
| <b>DIBO</b>     | 9.54                   | 15.62                 | 6.26                    | —                      | —                     | —                       |
| <b>BCN</b>      | 8.65                   | 13.89                 | 3.00                    | —                      | —                     | —                       |
| <b>HO-COT</b>   | 7.03                   | 14.56                 | 1.30                    | 4.02                   | 19.41                 | 5.89                    |
| <b>DIFO</b>     | 9.80                   | 12.96                 | 0.54                    | 9.62                   | 13.85                 | 2.69                    |
| <b>N-COT</b>    | 8.72                   | 14.29                 | 0.27                    | 6.66                   | 14.60                 | 0.71                    |
| <b>O-COT</b>    | 8.98                   | 13.14                 | -3.01                   | 9.03                   | 14.32                 | -1.52                   |
| <b>S-COT</b>    | 9.10                   | 16.99                 | 2.84                    | 9.20                   | 17.04                 | 0.54                    |

[a] Computed at ZORA-BP86/TZ2P.

**Table S3.** Activation energies  $\Delta E^\ddagger$  (kcal mol<sup>-1</sup>) for the retro-Cope reactions of propyne, 2-butyne and the original cyclooctyne **OCT** and functionalized cyclooctynes with **DHMA** along *anti*-pathways, computed at various levels of theory.

| Alkyne          | BP86/TZ2P <sup>[a]</sup> | BP86-D3(BJ)/TZ2P//BP86/TZ2P <sup>[b]</sup> | M06-2X/TZ2P//BP86/TZ2P <sup>[c]</sup> | COSMO(acetonitrile)-BP86/TZ2P//BP86/TZ2P <sup>[d]</sup> | DLPNO-CCSD(T)/def2-QZVPP//BP86/TZ2P <sup>[e]</sup> |
|-----------------|--------------------------|--------------------------------------------|---------------------------------------|---------------------------------------------------------|----------------------------------------------------|
| <b>Propyne</b>  | 13.42                    | 8.58                                       | 19.4                                  | 15.38                                                   | 21.34                                              |
| <b>2-butyne</b> | 15.81                    | 9.42                                       | 22.14                                 | 17.13                                                   | 23.00                                              |
| <b>COT</b>      | 4.59                     | -1.88                                      | 10.02                                 | 6.09                                                    | 11.24                                              |
| <b>DIBO</b>     | 4.06                     | -4.52                                      | 9.55                                  | 5.25                                                    | 9.57                                               |
| <b>BCN</b>      | 2.11                     | -4.53                                      | 6.03                                  | 3.86                                                    | 7.65                                               |
| <b>HO-COT</b>   | 2.31                     | -4.58                                      | 5.51                                  | 3.6                                                     | 6.75                                               |
| <b>DIFO</b>     | 0.21                     | -6.58                                      | 2.86                                  | 0.53                                                    | 4.31                                               |
| <b>N-COT</b>    | 2.89                     | -3.57                                      | 7.49                                  | 4.38                                                    | 9.11                                               |
| <b>O-COT</b>    | 0.99                     | -5.45                                      | 4.4                                   | 2.28                                                    | 5.96                                               |
| <b>S-COT</b>    | 5.84                     | -0.75                                      | 11.38                                 | 6.61                                                    | 12.13                                              |

[a] Computed at ZORA-BP86/TZ2P.

[b] Energies computed at ZORA-BP86-D3(BJ)/TZ2P, with geometries computed at ZORA-BP86/TZ2P.

[c] Energies computed at ZORA-M06-2X/TZ2P, with geometries computed at ZORA-BP86/TZ2P.

[d] Energies computed at COSMO(acetonitrile)-ZORA-BP86/TZ2P, with geometries computed at ZORA-BP86/TZ2P.

[e] Energies computed at DLPNO-CCSD(T)/def2-QZVPP where the SCF convergence tolerance was set to tight, with geometries computed at ZORA-BP86/TZ2P.

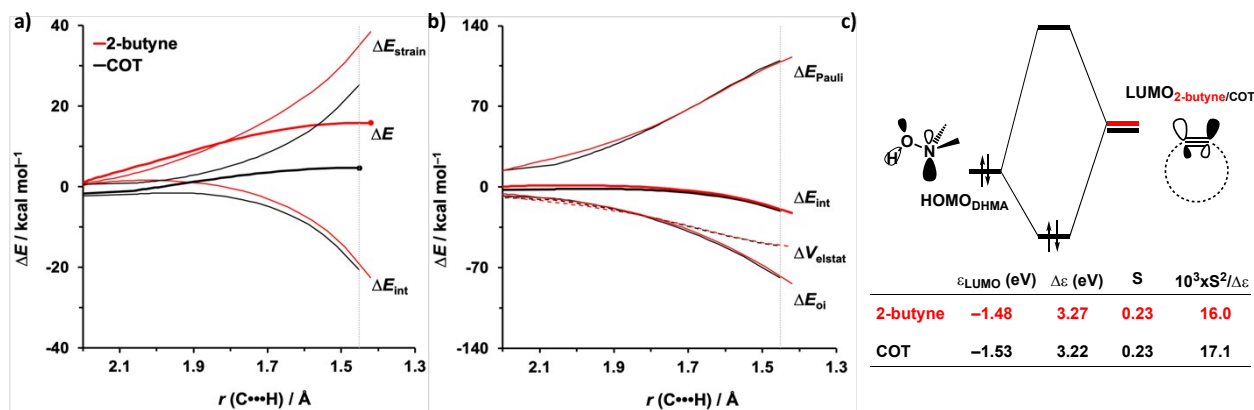

**Fig. S3.** a) Activation strain model and b) decomposition of strain energies for the retro-Cope reactions of 2-butyne and **COT** with **DMHA**. Transition states are indicated by dots. The energy terms along the IRC are projected on the length of the newly forming C $\cdots$ H bond and the vertical dotted line indicates the point at which the length of the C $\cdots$ H bond is 1.45 Å. c) Schematic diagrams with LUMO energies, energy gaps  $\Delta\epsilon$ , overlaps S, and values of  $S^2/\Delta\epsilon$  term associated with the key donor–acceptor interaction between  $\text{HOMO}_{\text{DHMA}}\text{--LUMO}_{\text{alkyne}}$  along with the retro-Cope reactions between 2-butyne and **COT** with **DMHA**. All were computed at ZORA-BP86/TZ2P.



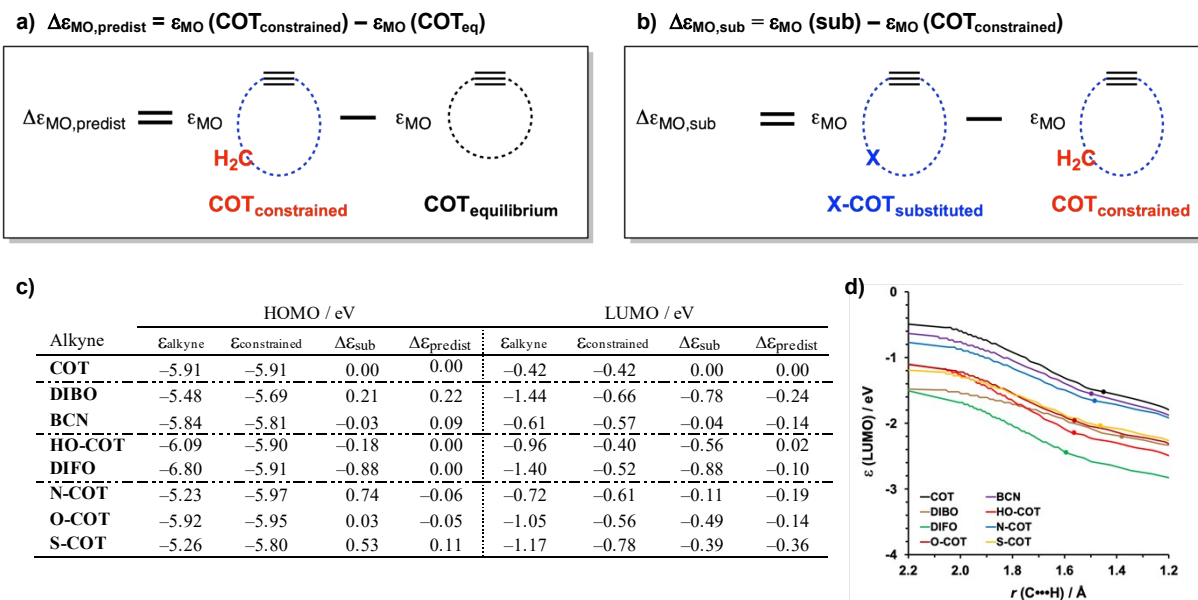

**Fig. S4.** A schematic representation of the formula that decomposes the change in orbital energies into a) a deformation ( $\Delta\varepsilon_{\text{deform}}$ ) and b) a substituent ( $\Delta\varepsilon_{\text{sub}}$ ) contribution. c) The  $\pi$ -HOMO and  $\pi^*$ -LUMO energies (eV) for the cyclic alkynes in their equilibrium geometry ( $\varepsilon_{\text{alkyne}}$ ) and the  $\pi$ -HOMO and  $\pi^*$ -LUMO energies for cyclooctyne constrained in the equilibrium geometry of the alkynes. d) The  $\pi^*$ -LUMO energies (eV) of the alkyne fragment associated with the retro-Cope reaction between strained alkynes and **DMHA** projected on the length of the newly forming C $\cdots$ H bond. The TSs are indicated by dots. Computed at ZORA-BP86/TZ2P.

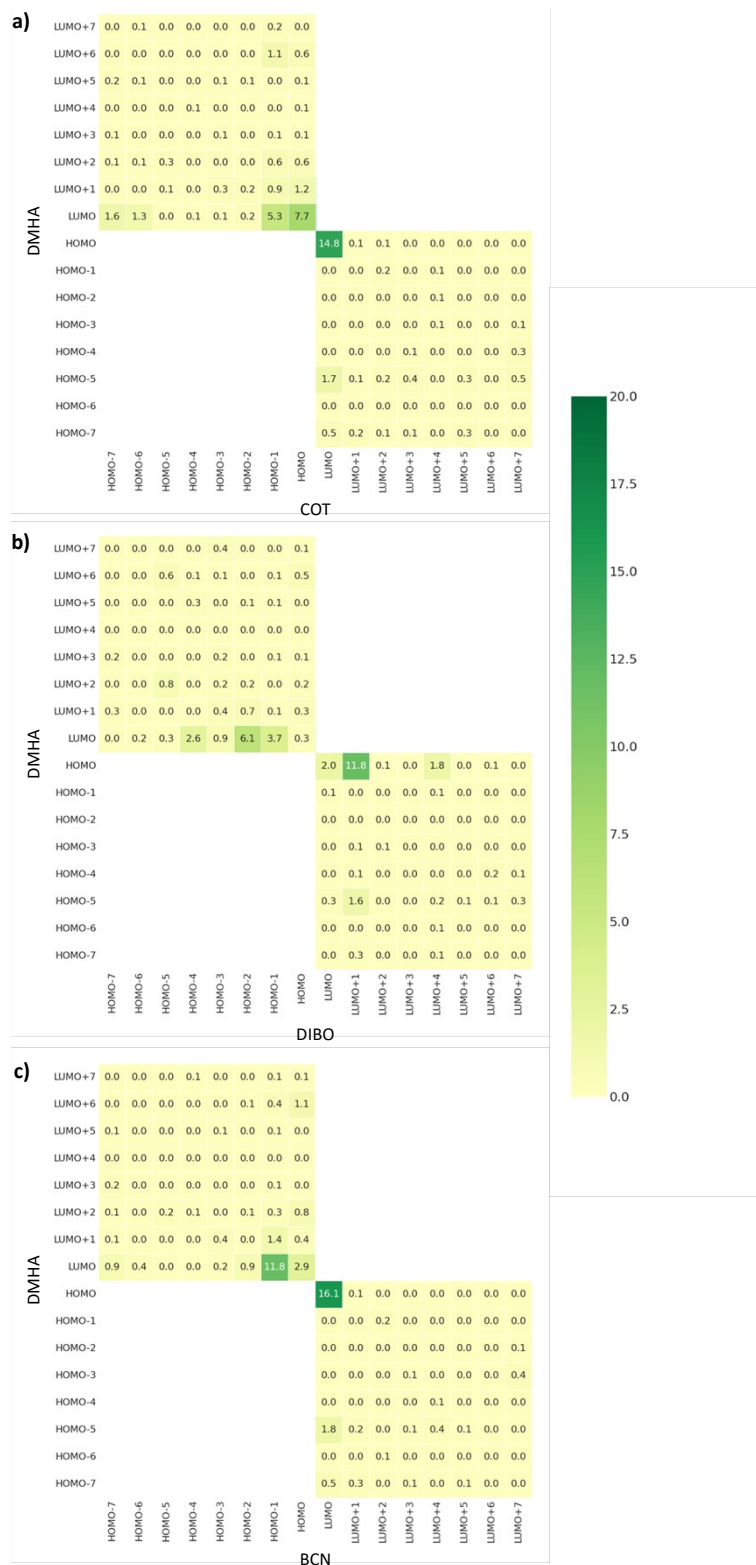

**Fig. S5.** Heatmaps for computed values of  $S^2/\Delta\epsilon$  associated with the donor–acceptor interactions along with the retro-Cope reactions of a) **COT**, b) **DIBO**, and c) **BCN** with **DMHA** at the consistent geometries where the length of  $C\cdots H$  bond is 1.50 Å. All were computed at ZORA-BP86/TZ2P.

## Electrostatic interaction of Cyclic Alkynes with Additional Predistortion

Electrostatic interactions are approximately equal for **COT** and **BCN**, whereas the **DIBO** shows a far less stabilizing  $\Delta V_{\text{elstat}}$  term (Fig. 2c). Again, this is a direct consequence of the  $\text{C}\cdots\text{N}$  bond forming distance in **DIBO** that lags behind that of **COT**. At a double consistent geometry, the  $\Delta V_{\text{elstat}}$  terms are within a  $\Delta\Delta V_{\text{elstat}} < 1.0 \text{ kcal mol}^{-1}$  for **COT**, **DIBO**, and **BCN** (Table S4). Therefore, we conclude that the deviation in  $\Delta r$  is decisive in setting the trend in electrostatic interactions. Specifically, it is the shorter bond-forming distance between the carbon in **COT** and **BCN**, and the nitrogen atom in **DMHA**, as compared to **DIBO**, gives rise to a more stabilizing  $\Delta V_{\text{elstat}}$ .

**Table S4.** The energy decomposition analysis (in  $\text{kcal mol}^{-1}$ ) of the retro-Cope reactions of the original **COT** and **DIBO** with **DMHA** at various consistent and double consistent geometries.<sup>[a]</sup>

| reactant | $r(\text{C}\cdots\text{H})$ | Consistent Geometry (CG)        |                                  |                              |                               | Double Consistent Geometry (DCG) |                                  |                              |                               | Difference between CG and DCG   |                                  |                              |                               |
|----------|-----------------------------|---------------------------------|----------------------------------|------------------------------|-------------------------------|----------------------------------|----------------------------------|------------------------------|-------------------------------|---------------------------------|----------------------------------|------------------------------|-------------------------------|
|          |                             | $\Delta E_{\text{Pauli}}^{[b]}$ | $\Delta E_{\text{elstat}}^{[b]}$ | $\Delta E_{\text{oi}}^{[b]}$ | $\Delta E_{\text{int}}^{[b]}$ | $\Delta E_{\text{Pauli}}^{[c]}$  | $\Delta E_{\text{elstat}}^{[c]}$ | $\Delta E_{\text{oi}}^{[c]}$ | $\Delta E_{\text{int}}^{[c]}$ | $\Delta\Delta E_{\text{Pauli}}$ | $\Delta\Delta E_{\text{elstat}}$ | $\Delta\Delta E_{\text{oi}}$ | $\Delta\Delta E_{\text{int}}$ |
| COT      | 1.85                        | 42.7                            | -22.4                            | -22.3                        | -2.0                          | 42.7                             | -22.4                            | -22.3                        | -2.0                          | 0.0                             | 0.0                              | 0.0                          | 0.0                           |
| COT      | 1.65                        | 77.2                            | -38.3                            | -45.7                        | -6.7                          | 77.2                             | -38.3                            | -45.7                        | -6.7                          | 0.0                             | 0.0                              | 0.0                          | 0.0                           |
| COT      | 1.50                        | 101.4                           | -48.4                            | -67.8                        | -14.8                         | 101.4                            | -48.4                            | -67.8                        | -14.8                         | 0.0                             | 0.0                              | 0.0                          | 0.0                           |
| COT      | 1.36                        | 122.0                           | -54.5                            | -99.5                        | -32.1                         | 122.0                            | -54.5                            | -99.5                        | -32.1                         | 0.0                             | 0.0                              | 0.0                          | 0.0                           |
| COT      | 1.18                        | 164.6                           | -68.8                            | -160.5                       | -64.7                         | 164.6                            | -68.8                            | -160.5                       | -64.7                         | 0.0                             | 0.0                              | 0.0                          | 0.0                           |
| DIBO     | 1.85                        | 34.1                            | -16.5                            | -19.5                        | -1.9                          | 46.5                             | -22.4                            | -24.4                        | -0.3                          | 12.4                            | -5.9                             | -4.9                         | 1.6                           |
| DIBO     | 1.65                        | 66.1                            | -30.2                            | -40.9                        | -5.0                          | 87.8                             | -39.3                            | -50.9                        | -2.5                          | 21.8                            | -9.2                             | -10.0                        | 2.6                           |
| DIBO     | 1.50                        | 89.6                            | -39.4                            | -62.1                        | -11.9                         | 109.2                            | -49.0                            | -70.8                        | -10.6                         | 19.6                            | -9.7                             | -8.7                         | 1.3                           |
| DIBO     | 1.36                        | 111.8                           | -45.8                            | -94.0                        | -28.0                         | 132.7                            | -55.1                            | -105.9                       | -28.3                         | 20.9                            | -9.3                             | -11.9                        | -0.3                          |
| DIBO     | 1.18                        | 154.9                           | -60.8                            | -156.4                       | -62.2                         | 168.9                            | -68.1                            | -163.6                       | -62.8                         | 14.0                            | -7.3                             | -7.3                         | -0.6                          |

[a] Computed at ZORA-BP86/TZ2P.

[b] The energy terms at consistent geometries where the length of the  $\text{C}\cdots\text{H}$  bond is equal to the  $r(\text{C}\cdots\text{H})$  given.

[c] The energy terms at double consistent geometry where both  $\text{C}\cdots\text{H}$  and  $\text{C}\cdots\text{N}$  bonds are equal to the archetypal **COT** at consistent geometry ( $r(\text{C}\cdots\text{H})$ ).

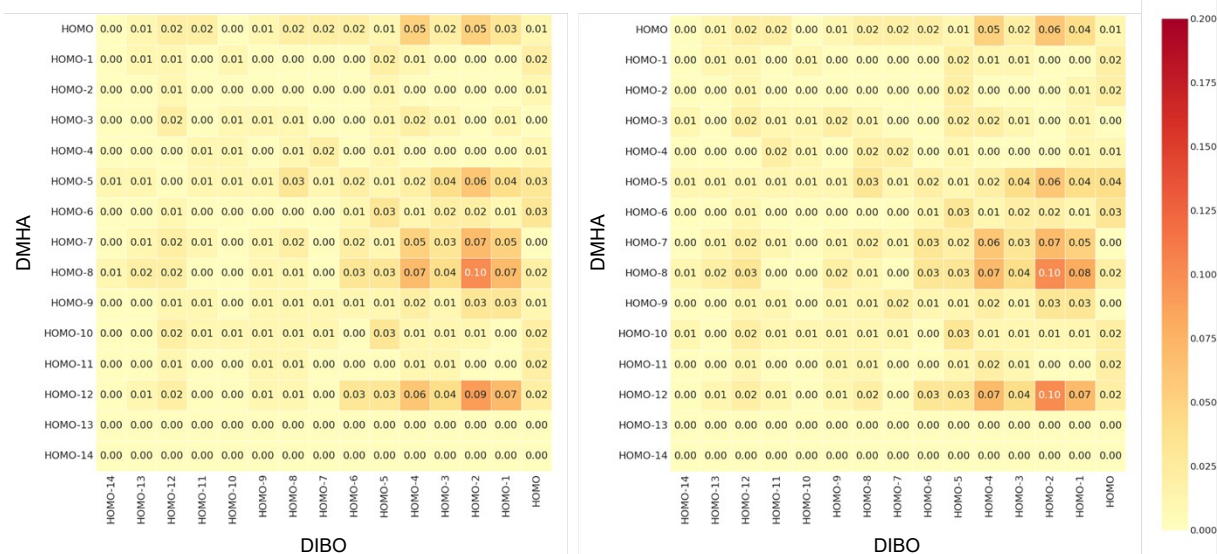

**Fig. S6.** Heatmaps for closed-shell orbital overlaps,  $S$ , between the filled FMOs of **DMHA** with the filled FMOs of a) **DIBO** at consistent geometry where  $C\cdots H$  bond is  $1.50 \text{ \AA}$  and b) **DIBO** in a double consistent geometry associated with the retro-Cope reactions along the anti-pathways. Computed at ZORA-BP86/TZ2P.

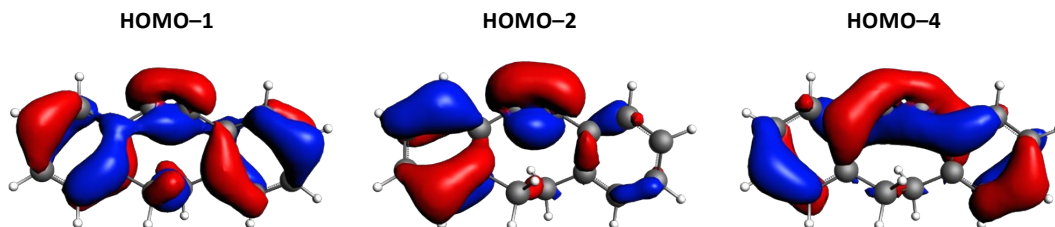

**Fig. S7.** The HOMO orbitals in **DIBO** that increase in Pauli repulsive overlap between the in-plane orbitals of **DMHA** going from CG to DCG at a  $C\cdots H$  bond distance of  $1.50 \text{ \AA}$ .

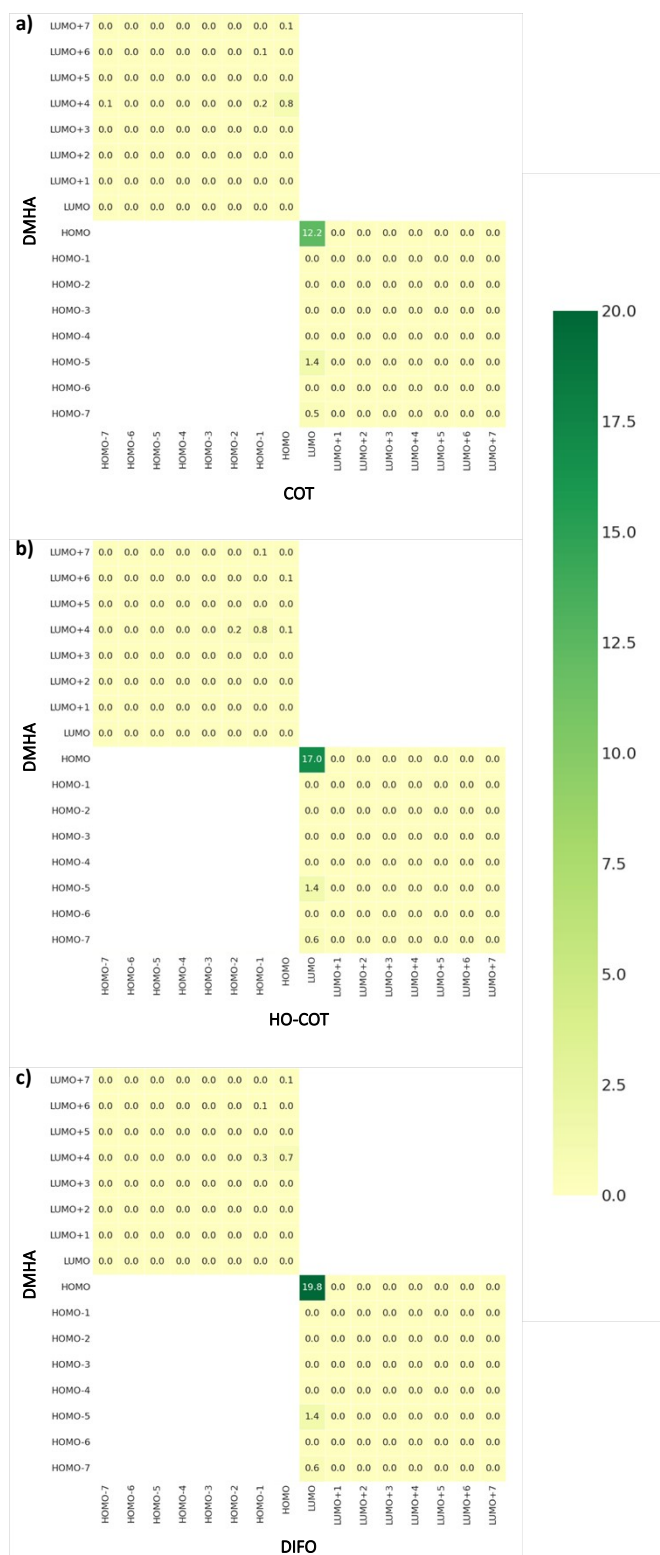

**Fig. S8.** Heatmaps for computed values of  $S^2/\Delta\epsilon$  associated with the donor–acceptor interactions along with the retro-Cope reactions of a) **COT**, b) **HO-COT**, and c) **DIFO** with **DMHA** along the *anti*-pathways at the consistent geometries where the length of  $C\cdots H$  bond is 1.56 Å. All were computed at ZORA-BP86/TZ2P.

## Electrostatic interaction of Cyclic Alkynes with Additional Predistortion

Comparing the electrostatic interactions terms at consistent geometry, we see that these are more stabilizing for **HO-COT** and **DIFO** than for **COT** (Fig. 4b). To understand if this is due to the more advanced (shorter) C $\cdots$ N bond forming distances than in **COT**, we determined the EDA terms at double consistent geometry (Table S5). At consistent geometry where the C $\cdots$ H and C $\cdots$ N bond forming distances are equal to the archetypal **COT**, we find that the  $\Delta V_{\text{elstat}}$  terms **HO-COT** and **DIFO** are actually less stabilized, relative to **COT**. Therefore, we conclude that solely the deviation in  $\Delta r$  is decisive in setting the trend in electrostatic interactions. Specifically, it is the shorter bond forming distance between the carbon in **HO-COT** and **DIFO**, and the nitrogen atom in **DMHA**, as compared to **COT**, gives rise to a more stabilizing  $\Delta V_{\text{elstat}}$ .

**Table S5.** The energy decomposition analysis (in kcal mol<sup>-1</sup>) of the retro-Cope reactions of the original **COT**, **HO-COT** and **DIFO** with **DMHA** at various consistent and double consistent geometries.<sup>[a]</sup>

| reactant | $r(\text{C}\cdots\text{H})$ | Consistent Geometry (CG)        |                                  |                              |                               | Double Consistent Geometry (DCG) |                                  |                              |                               | Difference between CG and DCG   |                                  |                              |                               |
|----------|-----------------------------|---------------------------------|----------------------------------|------------------------------|-------------------------------|----------------------------------|----------------------------------|------------------------------|-------------------------------|---------------------------------|----------------------------------|------------------------------|-------------------------------|
|          |                             | $\Delta E_{\text{Pauli}}^{[b]}$ | $\Delta E_{\text{elstat}}^{[b]}$ | $\Delta E_{\text{oi}}^{[b]}$ | $\Delta E_{\text{int}}^{[b]}$ | $\Delta E_{\text{Pauli}}^{[c]}$  | $\Delta E_{\text{elstat}}^{[c]}$ | $\Delta E_{\text{oi}}^{[c]}$ | $\Delta E_{\text{int}}^{[c]}$ | $\Delta\Delta E_{\text{Pauli}}$ | $\Delta\Delta E_{\text{elstat}}$ | $\Delta\Delta E_{\text{oi}}$ | $\Delta\Delta E_{\text{int}}$ |
| COT      | 1.85                        | 42.7                            | -22.4                            | -22.3                        | -2.0                          | 42.7                             | -22.4                            | -22.3                        | -2.0                          | 0.0                             | 0.0                              | 0.0                          | 0.0                           |
| COT      | 1.65                        | 77.2                            | -38.3                            | -45.7                        | -6.7                          | 77.2                             | -38.3                            | -45.7                        | -6.7                          | 0.0                             | 0.0                              | 0.0                          | 0.0                           |
| COT      | 1.50                        | 101.4                           | -48.4                            | -67.8                        | -14.8                         | 101.4                            | -48.4                            | -67.8                        | -14.8                         | 0.0                             | 0.0                              | 0.0                          | 0.0                           |
| COT      | 1.36                        | 122.0                           | -54.5                            | -99.5                        | -32.1                         | 122.0                            | -54.5                            | -99.5                        | -32.1                         | 0.0                             | 0.0                              | 0.0                          | 0.0                           |
| COT      | 1.18                        | 164.6                           | -68.8                            | -160.5                       | -64.7                         | 164.6                            | -68.8                            | -160.5                       | -64.7                         | 0.0                             | 0.0                              | 0.0                          | 0.0                           |
| HO-COT   | 1.85                        | 43.8                            | -23.0                            | -24.7                        | -3.8                          | 41.8                             | -22.0                            | -23.6                        | -3.8                          | 2.0                             | -1.0                             | -1.0                         | 0.0                           |
| HO-COT   | 1.65                        | 83.4                            | -41.9                            | -52.2                        | -10.6                         | 75.6                             | -37.6                            | -48.4                        | -10.5                         | 7.8                             | -4.2                             | -3.8                         | -0.2                          |
| HO-COT   | 1.50                        | 114.5                           | -55.4                            | -80.4                        | -21.3                         | 99.4                             | -47.6                            | -71.1                        | -19.3                         | 15.0                            | -7.8                             | -9.3                         | -2.1                          |
| HO-COT   | 1.36                        | 135.1                           | -62.1                            | -112.1                       | -39.1                         | 120.2                            | -54.1                            | -103.0                       | -36.8                         | 14.9                            | -8.0                             | -9.1                         | -2.3                          |
| HO-COT   | 1.18                        | 177.2                           | -76.9                            | -172.2                       | -72.0                         | 163.6                            | -69.2                            | -162.3                       | -67.9                         | 13.5                            | -7.7                             | -9.9                         | -4.0                          |
| DIFO     | 1.85                        | 42.4                            | -22.0                            | -25.3                        | -4.9                          | 40.4                             | -21.1                            | -24.3                        | -5.0                          | 2.0                             | -0.9                             | -1.0                         | 0.1                           |
| DIFO     | 1.65                        | 83.3                            | -41.4                            | -53.9                        | -12.1                         | 73.1                             | -36.0                            | -49.2                        | -12.1                         | 10.2                            | -5.4                             | -4.7                         | 0.0                           |
| DIFO     | 1.50                        | 115.9                           | -55.5                            | -82.9                        | -22.5                         | 96.3                             | -45.3                            | -72.1                        | -21.1                         | 19.6                            | -10.2                            | -10.8                        | -1.5                          |
| DIFO     | 1.36                        | 136.5                           | -61.8                            | -114.7                       | -40.0                         | 116.5                            | -51.0                            | -103.9                       | -38.4                         | 20.0                            | -10.8                            | -10.8                        | -1.6                          |
| DIFO     | 1.18                        | 176.8                           | -75.0                            | -174.8                       | -73.0                         | 158.7                            | -64.8                            | -163.4                       | -69.5                         | 18.1                            | -10.2                            | -11.4                        | -3.5                          |

[a] Computed at ZORA-BP86/TZ2P.

[b] The energy terms at consistent geometries where the length of the C $\cdots$ H bond is equal to the  $r(\text{C}\cdots\text{H})$  given.

[c] The energy terms at double consistent geometry where both C $\cdots$ H and C $\cdots$ N bonds are equal to the archetypal **COT** at consistent geometry ( $r(\text{C}\cdots\text{H})$ ).

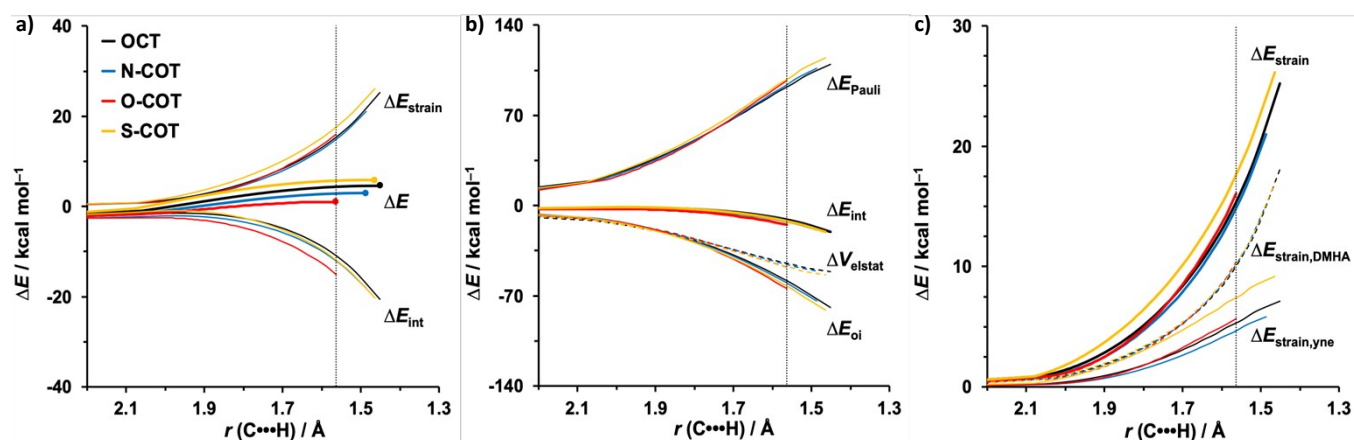

**Fig. S9.** a) Activation strain model, b) energy decomposition analyses and c) decomposition of strain energies for the retro-Cope reactions of **COT**, **N-COT**, **O-COT** and **S-COT** with **DMHA**. Transition states are indicated by dots. The energy terms along the IRC are projected on the length of the newly forming C $\cdots$ H bond and the vertical dotted line indicates the point at which the length of the C $\cdots$ H bond is 1.56 Å. All were computed at ZORA-BP86/TZ2P.

**Table S6.** The structural deformation of key angles (in  $^{\circ}$ ) and bonds distances (in Å) from equilibrium geometries to consistent geometries, where the lengths of the C $\cdots$ H bond are 1.56 Å, associated with the retro-Cope reactions of **COT**, **N-COT**, **O-COT** and **S-COT** with **DMHA** along the *anti*-pathways. Computed at ZORA-BP86/TZ2P.

| Y                     | DMHA                      |                           |                         | Y-COT            |                         |                         |
|-----------------------|---------------------------|---------------------------|-------------------------|------------------|-------------------------|-------------------------|
|                       | $\Delta r$ (C $\cdots$ H) | $\Delta r$ (N $\cdots$ O) | $\Delta \angle$ (H-O-N) | $\Delta r$ (C-C) | $\Delta \angle$ (C-C=C) | $\Delta \angle$ (C=C-C) |
| <b>CH<sub>2</sub></b> | 0.12                      | -0.09                     | -3.72                   | 0.04             | -13.92                  | -2.89                   |
| <b>NH</b>             | 0.12                      | -0.09                     | -3.43                   | 0.04             | -11.86                  | -3.85                   |
| <b>O</b>              | 0.12                      | -0.09                     | -3.40                   | 0.04             | -11.60                  | -6.00                   |
| <b>S</b>              | 0.12                      | -0.09                     | -3.72                   | 0.04             | -17.19                  | -6.39                   |

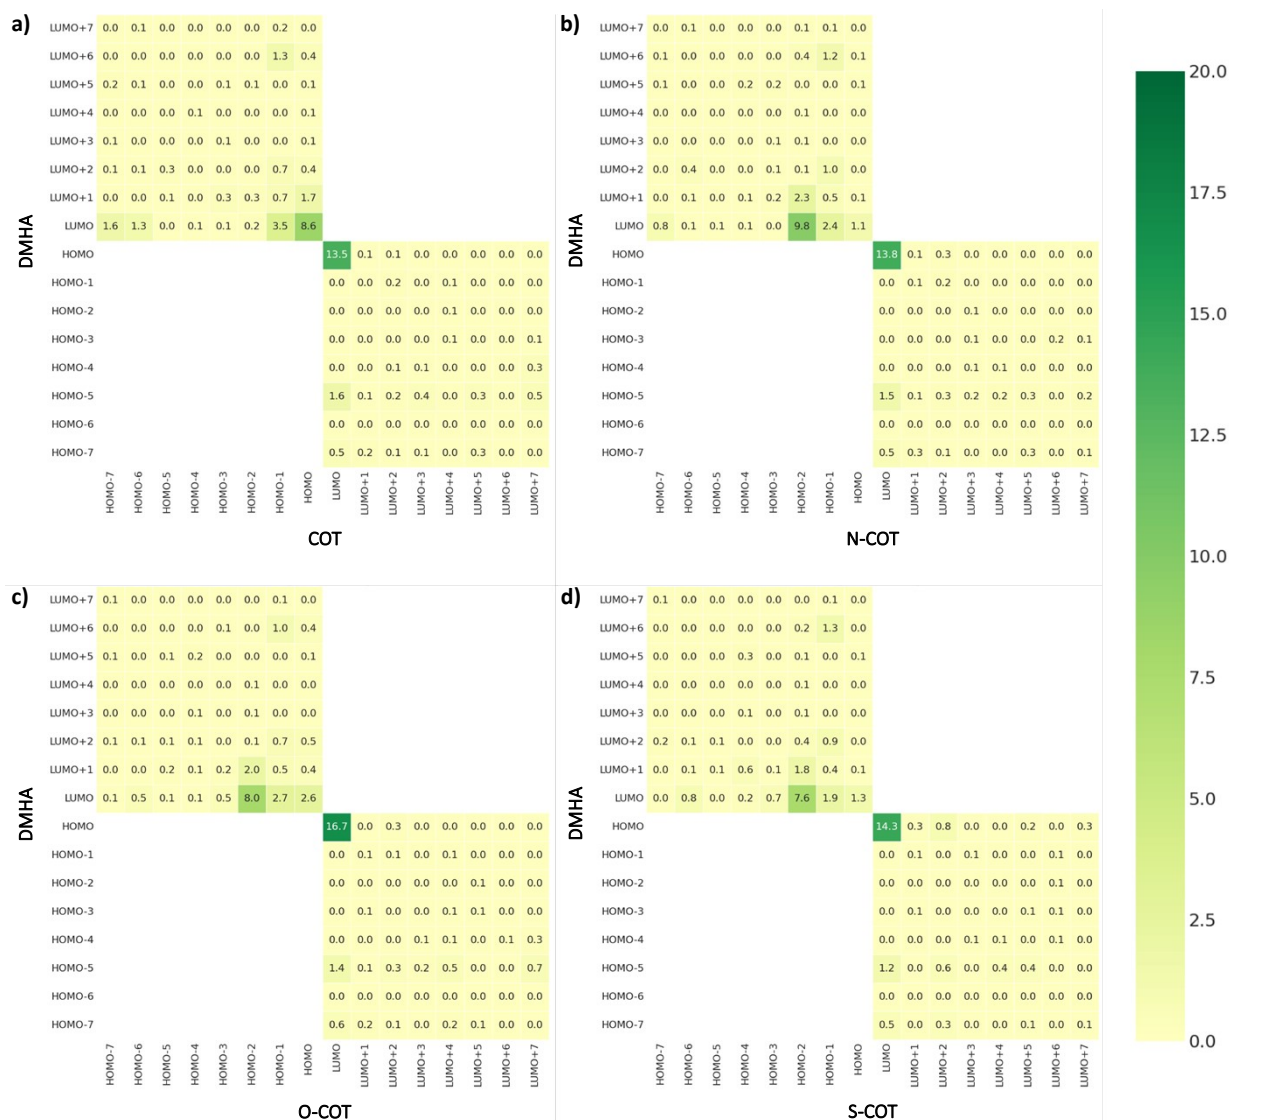

**Fig. S10.** Heatmaps for computed values of  $S^2/\Delta\epsilon$  associated with the donor–acceptor interactions along with the retro-Cope reactions of a) COT, b) N-COT, c) O-COT and d) S-COT with DMHA along the *anti*-pathways at the consistent geometries where the length of  $C\cdots H$  bond is  $1.56\text{ \AA}$ . All were computed at ZORA-BP86/TZ2P.



### Effect of Endocyclic Propargylic Substitution on the Electrostatic Interaction

Similar to the trends in the systems presented above, we suggest that the decrease in  $\Delta r$  in **Y-COT** establishes a more stabilizing electrostatic interaction between the two isolated deformed fragments. Specifically, from our EDA at double consistent geometry we see that the  $\Delta V_{\text{elstat}}$  terms are within a  $\Delta\Delta V_{\text{elstat}} < 1.0 \text{ kcal mol}^{-1}$  for **Y-COT** (Table S7). Therefore, we say that the more stabilizing electrostatic interaction is principally caused by the decreased distance between the terminal carbon of **Y-COT** and the nitrogen atom in **DMHA**, going from **COT** to **N-COT** to **O-COT**, resulting in a more stabilizing  $\Delta V_{\text{elstat}}$ . Additionally, the VDD charges of key atoms of the isolated deformed fragments at a consistent geometry, where the  $\text{C}\cdots\text{H}$  bond length is 1.71 Å (Fig. 7c), suggest that the attractive electrostatic interaction between the positively charged hydrogen of **DMHA** (+162 millielectrons) with the negatively charged carbon ( $\text{C}_2$ ) closest to the endocyclic propargylic position in cyclooctyne (−115 millielectrons). Here, the electronegative substituents at the endocyclic propargylic position cause an accumulation of the electron density at the  $\text{C}_2$  with the VDD charges going from −115 to −135 and −132 millielectrons for **COT**, **N-COT**, and **O-COT**.

**Table S7.** The energy decomposition analysis (in kcal mol<sup>-1</sup>) of the retro-Cope reactions of the original COT, N-COT and O-COT with DMHA at various consistent and double consistent geometries.<sup>[a]</sup>

| reactant | $r(\text{C}\cdots\text{H})$ | Consistent Geometry (CG)        |                                  |                              |                               | Double Consistent Geometry (DCG) |                                  |                              |                               | Difference between CG and DCG   |                                  |                              |                               |
|----------|-----------------------------|---------------------------------|----------------------------------|------------------------------|-------------------------------|----------------------------------|----------------------------------|------------------------------|-------------------------------|---------------------------------|----------------------------------|------------------------------|-------------------------------|
|          |                             | $\Delta E_{\text{Pauli}}^{[b]}$ | $\Delta E_{\text{elstat}}^{[b]}$ | $\Delta E_{\text{oi}}^{[b]}$ | $\Delta E_{\text{int}}^{[b]}$ | $\Delta E_{\text{Pauli}}^{[c]}$  | $\Delta E_{\text{elstat}}^{[c]}$ | $\Delta E_{\text{oi}}^{[c]}$ | $\Delta E_{\text{int}}^{[c]}$ | $\Delta\Delta E_{\text{Pauli}}$ | $\Delta\Delta E_{\text{elstat}}$ | $\Delta\Delta E_{\text{oi}}$ | $\Delta\Delta E_{\text{int}}$ |
| COT      | 1.85                        | 42.7                            | -22.4                            | -22.3                        | -2.0                          | 42.7                             | -22.4                            | -22.3                        | -2.0                          | 0.0                             | 0.0                              | 0.0                          | 0.0                           |
| COT      | 1.65                        | 77.2                            | -38.3                            | -45.7                        | -6.7                          | 77.2                             | -38.3                            | -45.7                        | -6.7                          | 0.0                             | 0.0                              | 0.0                          | 0.0                           |
| COT      | 1.50                        | 101.4                           | -48.4                            | -67.8                        | -14.8                         | 101.4                            | -48.4                            | -67.8                        | -14.8                         | 0.0                             | 0.0                              | 0.0                          | 0.0                           |
| COT      | 1.36                        | 122.0                           | -54.5                            | -99.5                        | -32.1                         | 122.0                            | -54.5                            | -99.5                        | -32.1                         | 0.0                             | 0.0                              | 0.0                          | 0.0                           |
| COT      | 1.18                        | 164.6                           | -68.8                            | -160.5                       | -64.7                         | 164.6                            | -68.8                            | -160.5                       | -64.7                         | 0.0                             | 0.0                              | 0.0                          | 0.0                           |
| N-COT    | 1.85                        | 42.5                            | -22.4                            | -22.9                        | -2.8                          | 42.7                             | -22.6                            | -22.9                        | -2.8                          | -0.2                            | 0.2                              | 0.0                          | 0.0                           |
| N-COT    | 1.65                        | 77.3                            | -38.6                            | -46.3                        | -7.6                          | 77.2                             | -38.5                            | -46.3                        | -7.6                          | 0.1                             | -0.1                             | 0.0                          | 0.0                           |
| N-COT    | 1.50                        | 104.3                           | -49.9                            | -71.4                        | -17.0                         | 99.1                             | -47.5                            | -70.1                        | -18.5                         | 5.3                             | -2.5                             | -1.3                         | 1.6                           |
| N-COT    | 1.36                        | 124.6                           | -56.3                            | -102.2                       | -33.8                         | 122.0                            | -54.8                            | -99.6                        | -32.4                         | 2.6                             | -1.4                             | -2.6                         | -1.5                          |
| N-COT    | 1.18                        | 168.1                           | -71.4                            | -163.1                       | -66.4                         | 165.3                            | -69.6                            | -160.2                       | -64.5                         | 2.8                             | -1.8                             | -2.9                         | -1.9                          |
| O-COT    | 1.85                        | 41.5                            | -21.8                            | -23.4                        | -3.7                          | 41.9                             | -22.1                            | -23.5                        | -3.7                          | -0.4                            | 0.3                              | 0.0                          | 0.0                           |
| O-COT    | 1.65                        | 78.9                            | -39.5                            | -49.4                        | -10.0                         | 75.4                             | -37.7                            | -47.9                        | -10.2                         | 3.6                             | -1.9                             | -1.4                         | 0.2                           |
| O-COT    | 1.50                        | 108.5                           | -52.2                            | -76.5                        | -20.2                         | 99.1                             | -47.5                            | -70.1                        | -18.5                         | 9.5                             | -4.8                             | -6.4                         | -1.7                          |
| O-COT    | 1.36                        | 129.1                           | -58.8                            | -107.7                       | -37.4                         | 132.4                            | -57.0                            | -110.5                       | -35.2                         | -3.3                            | -1.8                             | 2.8                          | -2.3                          |
| O-COT    | 1.18                        | 171.0                           | -73.0                            | -168.2                       | -70.2                         | 159.1                            | -65.7                            | -170.6                       | -77.3                         | 11.9                            | -7.3                             | 2.4                          | 7.1                           |

[a] Computed at ZORA-BP86/TZ2P.

[b] The energy terms at consistent geometries where the length of the C $\cdots$ H bond is equal to the  $r(\text{C}\cdots\text{H})$  given.

[c] The energy terms at double consistent geometry where both C $\cdots$ H and C $\cdots$ N bonds are equal to the archetypal COT at consistent geometry ( $r(\text{C}\cdots\text{H})$ ).

**Table S8.** The total electronic energies (kcal mol<sup>-1</sup>), enthalpies (kcal mol<sup>-1</sup>), Gibbs free energies (kcal mol<sup>-1</sup>) relative to the spherical average-of-configuration atoms, the number of imaginary vibrational frequencies (and their wavelength), and cartesian coordinates (Å), for all stationary points (reactant complex RC, transition state TS, product P), computed at ZORA-BP86/TZ2P using AMS2021.

---

**DMHA (reactant)**

$E = -1304.97$

$H = -1242.81$

$G = -1263.95$

$N_{\text{imag}} = 0$

|   |             |             |             |
|---|-------------|-------------|-------------|
| N | -1.33165200 | 0.84445200  | -0.34305000 |
| C | -2.62488600 | 1.48989700  | -0.55845700 |
| O | -1.61334300 | -0.33846500 | 0.48370400  |
| C | -0.44835400 | 1.68515500  | 0.46224200  |
| H | -2.45754200 | 2.40070000  | -1.14884700 |
| H | -3.12650700 | 1.76120300  | 0.39004800  |
| H | -3.27505400 | 0.81694300  | -1.12812800 |
| H | -1.28350600 | -1.05846900 | -0.08175600 |
| H | 0.49381100  | 1.15501300  | 0.63940800  |
| H | -0.89711400 | 1.96134500  | 1.43549000  |
| H | -0.23562000 | 2.59994100  | -0.10698700 |

**Propyne (reactant)**

$E = -906.52$

$H = -869.60$

$G = -887.94$

$N_{\text{imag}} = 0$

|   |             |             |             |
|---|-------------|-------------|-------------|
| C | -1.45412379 | 0.00017528  | 0.00008524  |
| C | 0.00000000  | 0.00000000  | 0.00000000  |
| C | 1.20883600  | -0.00000000 | -0.00000000 |
| H | -1.84876703 | 0.51310530  | 0.88842930  |
| H | -1.84908846 | -1.02548520 | 0.00010645  |
| H | -1.84889850 | 0.51311555  | -0.88819678 |
| H | 2.27773821  | 0.00002691  | 0.00001317  |

**2-butyne (reactant)**

$E = -1288.53$

$H = -1233.75$

$G = -1254.20$

$N_{\text{imag}} = 0$

|   |             |             |            |
|---|-------------|-------------|------------|
| C | -1.45624505 | -0.00006439 | 0.00000000 |
| C | 0.00000000  | 0.00000000  | 0.00000000 |
| C | 1.21137154  | 0.00000000  | 0.00000000 |
| C | 2.66761658  | 0.00006439  | 0.00000000 |
| H | -1.85559181 | 0.88521718  | 0.51590000 |
| H | -1.85554219 | -0.88942588 | 0.50880000 |

|   |             |             |             |
|---|-------------|-------------|-------------|
| H | -1.85556935 | 0.00404748  | -1.02460000 |
| H | 3.06691282  | 0.88542463  | -0.51590000 |
| H | 3.06696491  | -0.88931840 | -0.50880000 |
| H | 3.06693775  | 0.00415496  | 1.02460000  |

**COT (reactant)**

$E = -2600.02$

$H = -2485.07$

$G = -2510.79$

$N_{\text{imag}} = 0$

|   |             |             |             |
|---|-------------|-------------|-------------|
| C | -0.69354500 | 1.36871400  | -0.35985700 |
| C | 0.69384400  | 1.36862900  | 0.35978100  |
| C | -0.60522300 | -1.48288400 | -0.03639600 |
| C | 1.85526100  | 0.56859500  | -0.28119500 |
| C | 0.60487800  | -1.48301400 | 0.03689700  |
| C | 1.94700200  | -0.92776800 | 0.13400400  |
| H | -0.56471100 | 1.04644500  | -1.40552800 |
| H | 0.56493800  | 1.04660000  | 1.40551700  |
| H | 1.76441500  | 0.62087000  | -1.37691000 |
| H | -1.02957200 | 2.41472600  | -0.41400700 |
| H | 1.03010900  | 2.41457600  | 0.41372000  |
| H | 2.81177500  | 1.04915000  | -0.02331100 |
| H | 2.31751600  | -1.00956800 | 1.16910600  |
| C | -1.85514300 | 0.56907300  | 0.28128000  |
| H | -2.81154800 | 1.04979300  | 0.02329700  |
| H | -1.76428700 | 0.62155100  | 1.37698500  |
| C | -1.94722300 | -0.92735400 | -0.13361300 |
| H | -2.31775900 | -1.00928200 | -1.16869800 |
| H | -2.67680900 | -1.45201100 | 0.50149700  |
| H | 2.67647000  | -1.45272000 | -0.50099700 |

**DIBO (reactant)**

$E = -4225.85$

$H = -4079.11$

$G = -4111.01$

$N_{\text{imag}} = 0$

|   |             |             |             |
|---|-------------|-------------|-------------|
| C | -0.55729400 | 1.06963000  | -0.90635700 |
| C | 0.70845400  | 1.36931600  | -0.00803600 |
| C | -0.44433400 | -1.35710000 | 0.40684600  |
| C | 1.97012000  | 0.59852400  | -0.33485300 |
| C | 0.75639500  | -1.38534300 | 0.18014600  |
| C | 2.00628600  | -0.82239900 | -0.17690600 |
| H | -0.26188400 | 0.35349400  | -1.68732300 |
| H | -3.04073100 | 2.20630600  | -0.63220300 |
| C | -1.77790000 | 0.52199300  | -0.19721600 |
| H | -0.84602500 | 1.99394400  | -1.42391900 |

|   |             |             |             |
|---|-------------|-------------|-------------|
| H | -5.05538500 | 1.24770100  | 0.44857300  |
| C | -1.73007600 | -0.76293600 | 0.42882600  |
| C | 3.19376200  | -1.53387500 | -0.41509900 |
| C | 4.34298700  | -0.86038500 | -0.82204500 |
| C | 4.31401600  | 0.52511600  | -0.99888200 |
| C | 3.13681600  | 1.24010000  | -0.75689400 |
| H | 3.19991900  | -2.61537700 | -0.28456300 |
| H | 5.26187500  | -1.41685100 | -1.00621700 |
| H | 5.21158000  | 1.05344600  | -1.32070600 |
| H | 3.12736400  | 2.32382300  | -0.88706000 |
| C | -2.87846700 | -1.30343800 | 1.03053900  |
| C | -4.07074500 | -0.58342700 | 1.03448600  |
| C | -4.12401100 | 0.68127200  | 0.44337700  |
| C | -2.98603200 | 1.22213600  | -0.16323600 |
| H | -2.82054100 | -2.28568900 | 1.49805400  |
| H | -4.95906400 | -1.00668900 | 1.50315200  |
| H | 0.93514800  | 2.44191100  | -0.06920400 |
| H | 0.44158200  | 1.16564200  | 1.03949500  |

**BCN (reactant)**

$E = -2783.35$

$H = -2664.85$

$G = -2690.81$

$N_{\text{imag}} = 0$

|   |             |             |             |
|---|-------------|-------------|-------------|
| C | 0.00557600  | -0.98076900 | -0.82309000 |
| C | 0.38789500  | 0.49460900  | -0.92810000 |
| C | -2.54086200 | -0.08202500 | 0.25386000  |
| C | 0.12266600  | 1.58073600  | 0.10132000  |
| C | -2.23693900 | 1.08958100  | 0.17033000  |
| C | -1.30569100 | 2.20097200  | 0.01022000  |
| H | 0.25645300  | 1.18364100  | 1.11794000  |
| H | 0.86964400  | 2.38172000  | -0.02741000 |
| H | -1.42942800 | 2.97425000  | 0.78318000  |
| H | -1.44541000 | 2.70125500  | -0.96156000 |
| C | -0.71589300 | -1.65594100 | 0.33159000  |
| H | -0.37230300 | -1.24184500 | 1.29053000  |
| H | -0.45355500 | -2.72705500 | 0.33616000  |
| C | -2.26828400 | -1.51503700 | 0.27432000  |
| H | -2.72367100 | -2.02233800 | 1.13804000  |
| H | -2.66536600 | -2.00915100 | -0.62699000 |
| C | 1.45422100  | -0.55713800 | -0.70960000 |
| H | 2.14989200  | -0.79461200 | -1.51342000 |
| H | -0.26385800 | -1.41182800 | -1.79126000 |
| H | 0.32724500  | 0.86934400  | -1.95360000 |
| H | 1.89447000  | -0.60021200 | 0.28791000  |

**HO-COT (reactant)** $E = -2746.95$  $H = -2628.70$  $G = -2656.35$  $N_{\text{imag}} = 0$ 

|   |             |             |             |
|---|-------------|-------------|-------------|
| C | -1.44668300 | 1.21288600  | -0.41825000 |
| C | -0.19087200 | 1.66085700  | 0.39669600  |
| C | -0.47149600 | -1.44781200 | 0.03467300  |
| C | 1.20776000  | 1.25203500  | -0.12611600 |
| C | 0.67451000  | -1.08162900 | 0.19174800  |
| C | 1.75271100  | -0.11322800 | 0.38073600  |
| H | -1.14341800 | 0.94437200  | -1.44291600 |
| H | -0.29739100 | 1.33562300  | 1.44407300  |
| H | 1.19356000  | 1.21314300  | -1.22732200 |
| H | -2.09355400 | 2.09568900  | -0.52595900 |
| H | -0.20193000 | 2.75985300  | 0.43119600  |
| H | 1.95040100  | 2.01403100  | 0.15310700  |
| H | 1.99218500  | -0.02983000 | 1.45282800  |
| C | -2.33794100 | 0.08777300  | 0.16275200  |
| H | -3.37176400 | 0.22417900  | -0.18966300 |
| H | -2.36615700 | 0.18103000  | 1.25891000  |
| C | -1.90413600 | -1.36275200 | -0.19663600 |
| H | -2.12607700 | -1.57003400 | -1.25623500 |
| O | 3.00485900  | -0.44810600 | -0.23770200 |
| H | -2.47952700 | -2.09061700 | 0.39445200  |
| H | 2.80705000  | -0.75608600 | -1.13952000 |

**DIFO (reactant)** $E = -2618.13$  $H = -2512.13$  $G = -2540.37$  $N_{\text{imag}} = 0$ 

|   |             |             |             |
|---|-------------|-------------|-------------|
| C | -1.68968700 | 1.19939800  | -0.40153700 |
| C | -0.33470800 | 1.60705500  | 0.25936800  |
| C | -0.75998200 | -1.47812700 | -0.05702200 |
| C | 0.97633800  | 1.15767000  | -0.42430600 |
| C | 0.42007600  | -1.20185900 | -0.05253200 |
| C | 1.50109600  | -0.22685300 | -0.01669000 |
| H | -1.51928600 | 0.90867200  | -1.45048600 |
| H | -0.31897600 | 1.28890900  | 1.31254700  |
| H | 0.85357400  | 1.14218700  | -1.51658900 |
| H | -2.31277200 | 2.10390800  | -0.44638100 |
| H | -0.30093100 | 2.70517500  | 0.28687400  |
| H | 1.78750900  | 1.86431600  | -0.19608100 |
| C | -2.54309000 | 0.11492200  | 0.30081600  |
| H | -3.60620500 | 0.28020400  | 0.07126000  |

|   |             |             |             |
|---|-------------|-------------|-------------|
| H | -2.43635300 | 0.22154300  | 1.39036900  |
| C | -2.20407700 | -1.35505400 | -0.08628600 |
| H | -2.57424800 | -1.57637400 | -1.10018000 |
| H | -2.70350200 | -2.05837300 | 0.59581500  |
| F | 2.56131400  | -0.57316700 | -0.84406200 |
| F | 2.04049700  | -0.15842900 | 1.26833500  |

**N-COT (reactant)**

$E = -2486.78$

$H = -2378.84$

$G = -2404.45$

$N_{\text{imag}} = 0$

|   |             |             |             |
|---|-------------|-------------|-------------|
| C | 0.14306700  | 1.90343100  | -0.61209200 |
| H | -0.48024500 | 2.66834800  | -0.12833900 |
| C | 0.03306500  | 0.58466000  | 0.02312800  |
| C | -0.05126900 | -0.62666600 | 0.01649700  |
| C | -0.14798600 | -1.96204600 | -0.55185100 |
| C | 0.29707000  | -1.84599900 | -2.03727900 |
| C | -0.35396300 | -0.68942800 | -2.83503300 |
| C | 0.32730600  | 0.72451400  | -2.82625900 |
| N | -0.24874400 | 1.82698100  | -2.03238300 |
| H | 1.18267300  | 2.26440000  | -0.55085200 |
| H | -1.18564500 | -2.32987200 | -0.49437800 |
| H | 0.47611200  | -2.70042600 | -0.02647600 |
| H | 0.07747000  | -2.80311100 | -2.53610400 |
| H | 1.39113900  | -1.72597500 | -2.06126900 |
| H | -1.40912300 | -0.58020600 | -2.53568700 |
| H | -0.37972100 | -1.00897100 | -3.88797800 |
| H | 0.32706400  | 1.08352800  | -3.86653000 |
| H | 1.38439300  | 0.62590600  | -2.53721000 |
| H | -1.26780200 | 1.79162500  | -2.09406000 |

**O-COT (reactant)**

$E = -2362.77$

$H = -2262.78$

$G = -2288.17$

$N_{\text{imag}} = 0$

|   |             |             |             |
|---|-------------|-------------|-------------|
| C | 0.13556300  | 1.89269100  | -0.64907700 |
| H | -0.53741300 | 2.63826800  | -0.20544800 |
| C | 0.07665700  | 0.59188100  | 0.01097300  |
| C | -0.00504500 | -0.61844400 | -0.00212400 |
| C | -0.12832600 | -1.95825600 | -0.55052800 |
| C | 0.27158800  | -1.85417000 | -2.05188000 |
| C | -0.35130900 | -0.67082800 | -2.83028700 |
| C | 0.35986900  | 0.71457800  | -2.77147900 |
| O | -0.30143700 | 1.74802400  | -2.01420900 |

|   |             |             |             |
|---|-------------|-------------|-------------|
| H | 1.16399400  | 2.30059600  | -0.61474500 |
| H | -1.16646800 | -2.31540100 | -0.45593900 |
| H | 0.50892300  | -2.69496900 | -0.03958400 |
| H | -0.00713100 | -2.79897400 | -2.54316000 |
| H | 1.36856000  | -1.78331200 | -2.11212500 |
| H | -1.40232900 | -0.52548600 | -2.53935300 |
| H | -0.37205700 | -0.96502600 | -3.89068000 |
| H | 0.38975200  | 1.12876300  | -3.78858700 |
| H | 1.40246100  | 0.59963000  | -2.42825100 |

**S-COT (reactant)**

$E = -2307.75$

$H = -2209.43$

$G = -2235.97$

$N_{\text{imag}} = 0$

|   |             |             |             |
|---|-------------|-------------|-------------|
| C | 0.12139500  | 2.01610900  | -0.41985300 |
| H | -0.60154000 | 2.65954900  | 0.09954100  |
| C | 0.06431000  | 0.63179200  | -0.01435700 |
| C | 0.02817600  | -0.57957500 | -0.05697200 |
| C | -0.08197700 | -1.93315000 | -0.57900100 |
| C | 0.26118300  | -1.89965500 | -2.09624800 |
| C | -0.38987800 | -0.73774000 | -2.88309800 |
| C | 0.41030800  | 0.59763500  | -2.92403400 |
| S | -0.36344500 | 2.11217900  | -2.22181400 |
| H | 1.12364600  | 2.44724300  | -0.28561700 |
| H | -1.11095100 | -2.30157300 | -0.43689300 |
| H | 0.57844800  | -2.64282800 | -0.05857300 |
| H | -0.04773600 | -2.86053900 | -2.53464900 |
| H | 1.35473900  | -1.84464200 | -2.20862300 |
| H | -1.40066300 | -0.54447900 | -2.49726000 |
| H | -0.52120200 | -1.07274100 | -3.92247200 |
| H | 0.57808000  | 0.89782400  | -3.96736600 |
| H | 1.40296100  | 0.48415700  | -2.46919300 |

**Propyne (anti-RC)**

$E = -2214.32$

$H = -2113.94$

$G = -2146.20$

$N_{\text{imag}} = 0$

|   |             |             |             |
|---|-------------|-------------|-------------|
| C | 0.00000000  | 0.00000000  | 0.00000000  |
| C | 1.21099427  | 0.00000000  | 0.00000000  |
| C | -1.45414488 | -0.01700837 | 0.00000000  |
| N | 3.82784822  | 1.77471811  | -0.00000000 |
| C | 4.59963848  | 2.06355739  | 1.20845300  |
| H | 5.46797707  | 1.39151828  | 1.23156700  |
| H | 4.95178950  | 3.11143516  | 1.24092400  |



|   |             |             |             |
|---|-------------|-------------|-------------|
| C | 4.59963848  | 2.06355739  | -1.20845300 |
| H | 5.46797707  | 1.39151828  | -1.23156700 |
| H | 4.95178950  | 3.11143516  | -1.24092400 |
| O | 2.71438848  | 2.72137495  | -0.00000000 |
| H | 1.93371480  | 2.12640660  | -0.00000000 |
| H | 3.97750409  | 1.86774524  | -2.08854100 |
| H | 3.97750409  | 1.86774524  | 2.08854100  |
| H | 2.28928870  | 0.04366731  | 0.00000000  |
| H | -1.85631911 | 0.48916016  | 0.88879100  |
| H | -1.83277891 | -1.04885528 | 0.00000000  |
| H | -1.85631911 | 0.48916016  | -0.88879100 |

**2-Butyne (RC)**

$E = -2596.51$

$H = -2478.85$

$G = -2510.22$

$N_{\text{imag}} = 0$

|   |             |             |             |
|---|-------------|-------------|-------------|
| C | 0.00000000  | 0.00000000  | 0.00000000  |
| C | 1.21335235  | -0.00000000 | -0.00000000 |
| C | -1.45680384 | -0.01738965 | 0.00140900  |
| N | 2.15140949  | 3.54924823  | -0.16454501 |
| C | 2.31241519  | 4.40283120  | 1.01161825  |
| H | 3.36712670  | 4.70197387  | 1.08057328  |
| H | 1.68179983  | 5.31112555  | 0.96171500  |
| C | 2.44635816  | 4.28585908  | -1.39241542 |
| H | 3.50349494  | 4.58379040  | -1.37197040 |
| H | 1.81829509  | 5.19063621  | -1.50142853 |
| O | 0.72463382  | 3.22685490  | -0.23005909 |
| H | 0.72319836  | 2.24646473  | -0.16472721 |
| H | 2.28036858  | 3.63103665  | -2.25492144 |
| H | 2.04735871  | 3.83387553  | 1.90950702  |
| C | 2.67088241  | 0.00048705  | 0.00139364  |
| H | -1.86309694 | 0.63300534  | 0.78897412  |
| H | -1.83731832 | -1.03375263 | 0.17681588  |
| H | -1.86086503 | 0.33054383  | -0.95984964 |
| H | 3.05352086  | 1.03183523  | -0.02962573 |
| H | 3.06689159  | -0.53929995 | -0.87066653 |
| H | 3.06474646  | -0.48533717 | 0.90553958  |

**COT (RC)**

$E = -3908.00$

$H = -3730.79$

$G = -3766.08$

$N_{\text{imag}} = 0$

|   |             |             |            |
|---|-------------|-------------|------------|
| C | -2.76373300 | -1.07648400 | 0.65851300 |
| C | -2.84829500 | 0.31132000  | 1.37303100 |

|   |             |             |             |
|---|-------------|-------------|-------------|
| C | -0.46704200 | 0.00303600  | -0.67025700 |
| C | -3.00443700 | 1.58102000  | 0.49937800  |
| C | -0.84628900 | 1.14400300  | -0.50459000 |
| C | -1.67604600 | 2.22518300  | 0.00714300  |
| H | -3.46782100 | -1.74732900 | 1.17217300  |
| H | -3.72619900 | 0.28130500  | 2.03486400  |
| H | -3.55619200 | 2.34620200  | 1.06667600  |
| H | -3.14494900 | -0.98375000 | -0.37110500 |
| H | -1.98090800 | 0.43430000  | 2.04108800  |
| H | -3.62046700 | 1.33864000  | -0.37986200 |
| H | -1.88415100 | 2.99944100  | -0.74599300 |
| C | -1.39905500 | -1.80960100 | 0.63495800  |
| H | -0.86466000 | -1.60348400 | 1.57466700  |
| H | -1.57214200 | -2.89632200 | 0.60578800  |
| C | -0.46110900 | -1.44845300 | -0.55247300 |
| H | 0.54994600  | -1.84483300 | -0.38126900 |
| H | -0.83381600 | -1.90434900 | -1.48401600 |
| H | -1.16621200 | 2.72893200  | 0.84414600  |
| H | 1.59085000  | 0.97619400  | -0.44067900 |
| N | 3.08202300  | -0.20335200 | -0.10817500 |
| C | 4.03705300  | -0.43486300 | -1.19048300 |
| H | 4.48948500  | -1.42583800 | -1.04775300 |
| H | 4.83895100  | 0.32803800  | -1.21544800 |
| H | 3.50581800  | -0.42380800 | -2.14852300 |
| C | 3.75805900  | -0.15737500 | 1.18663800  |
| H | 4.55171200  | 0.61391100  | 1.22090600  |
| H | 4.20699100  | -1.14150800 | 1.37872200  |
| H | 3.02249000  | 0.05433100  | 1.97047500  |
| O | 2.55260000  | 1.14297300  | -0.32628900 |

### **DIBO (RC)**

$$E = -5533.47$$

$$H = -5324.45$$

$$G = -5365.42$$

$$N_{\text{imag}} = 0$$

|   |             |             |             |
|---|-------------|-------------|-------------|
| C | -0.69118600 | 1.69821500  | 0.19890500  |
| C | 0.30327400  | 1.95075800  | 1.40189200  |
| C | -0.72258900 | -0.85255700 | 1.25006100  |
| C | 1.65710400  | 1.27715900  | 1.31695100  |
| C | 0.49786900  | -0.80047900 | 1.31772200  |
| C | 1.75615700  | -0.14858100 | 1.33597600  |
| H | -0.16981800 | 1.09100200  | -0.55578000 |
| H | -3.24290400 | 2.68400900  | -0.02539900 |
| C | -2.00328600 | 1.01863700  | 0.53095600  |
| H | -0.91518900 | 2.66155100  | -0.27770500 |
| H | -5.38328000 | 1.51790100  | 0.42570200  |

|   |             |             |             |
|---|-------------|-------------|-------------|
| C | -2.01725600 | -0.32655600 | 1.01609800  |
| C | 3.00779900  | -0.78486400 | 1.32407600  |
| C | 4.17084600  | -0.01968500 | 1.27923600  |
| C | 4.09041700  | 1.37485200  | 1.24040600  |
| C | 2.84462300  | 2.01018800  | 1.25834600  |
| H | 3.03757000  | -1.87574100 | 1.34339300  |
| H | 5.14375300  | -0.51109900 | 1.26974200  |
| H | 5.00088700  | 1.97328400  | 1.20165800  |
| H | 2.79385000  | 3.10038200  | 1.23903400  |
| C | -3.23317500 | -0.98502500 | 1.26056100  |
| C | -4.43965300 | -0.32353300 | 1.04493100  |
| C | -4.43972600 | 0.99770300  | 0.59116800  |
| C | -3.23163600 | 1.65558900  | 0.34013000  |
| H | -3.21886600 | -2.01144900 | 1.62488600  |
| H | -5.38165800 | -0.83737500 | 1.23542300  |
| H | 0.46318700  | 3.03232900  | 1.50198500  |
| H | -0.18871100 | 1.62171500  | 2.32919000  |
| H | 0.27171000  | -3.17335300 | 1.42725500  |
| N | 1.87163600  | -4.25225700 | 1.43364800  |
| C | 2.16982600  | -5.05919100 | 0.25126000  |
| H | 3.25767400  | -5.20132200 | 0.19456900  |
| H | 1.67738100  | -6.04967100 | 0.28312200  |
| H | 1.83678400  | -4.52341800 | -0.64428900 |
| C | 2.25516400  | -4.95021500 | 2.65975300  |
| H | 1.76379100  | -5.93739300 | 2.75281400  |
| H | 3.34449000  | -5.09175300 | 2.65111000  |
| H | 1.98587300  | -4.33430400 | 3.52467100  |
| O | 0.41323000  | -4.14199400 | 1.48165200  |

**BCN (RC)**

$E = -4091.42$

$H = -3910.65$

$G = -3946.11$

$N_{\text{imag}} = 0$

|   |             |             |             |
|---|-------------|-------------|-------------|
| C | 2.45774200  | 1.15818900  | 0.72766800  |
| C | 2.24805600  | -0.31184700 | 1.09025400  |
| C | -0.40288100 | 1.49230800  | 1.08051100  |
| C | 1.12283700  | -1.21639600 | 0.61518700  |
| C | -0.56490500 | 0.32408600  | 1.37104600  |
| C | -0.18985900 | -1.08426700 | 1.44711900  |
| H | 0.88075400  | -1.00557300 | -0.43634300 |
| H | 1.46632200  | -2.26318300 | 0.65728700  |
| H | -0.97178500 | -1.73785000 | 1.03483200  |
| H | -0.02069500 | -1.39464700 | 2.49031700  |
| C | 1.58394900  | 2.00718900  | -0.18087800 |
| H | 1.22585100  | 1.41168600  | -1.03287800 |

|   |             |             |             |
|---|-------------|-------------|-------------|
| H | 2.19425500  | 2.82459800  | -0.59918000 |
| C | 0.34104600  | 2.62250700  | 0.53368700  |
| H | -0.25161800 | 3.21339600  | -0.17979200 |
| H | 0.65636200  | 3.31239400  | 1.33243600  |
| C | 3.37733200  | 0.09422400  | 0.16834500  |
| H | 4.40698000  | 0.03419500  | 0.51838400  |
| H | 2.88449700  | 1.73493900  | 1.55283600  |
| H | 2.56010400  | -0.53711800 | 2.11375400  |
| H | 3.25082400  | -0.14846100 | -0.88794300 |
| H | -4.89229900 | -2.28506000 | 0.32866100  |
| H | -5.64750500 | -0.67250500 | 0.09172400  |
| O | -3.42679300 | 0.62976600  | -0.15260300 |
| H | -4.58905000 | -0.97887200 | 1.50554600  |
| H | -2.56009000 | 0.72398400  | 0.30150500  |
| N | -3.54606800 | -0.82035600 | -0.30520500 |
| C | -3.72846800 | -1.05224500 | -1.73639900 |
| H | -3.86159300 | -2.13055000 | -1.89901300 |
| H | -4.60780000 | -0.51530500 | -2.14192400 |
| H | -2.83205800 | -0.72205300 | -2.27281800 |
| C | -4.74188600 | -1.20282500 | 0.44411400  |

### HO-COT (*anti*-RC)

$$E = -4056.85$$

$$H = -3875.66$$

$$G = -3913.27$$

$$N_{\text{imag}} = 0$$

|   |             |             |             |
|---|-------------|-------------|-------------|
| C | 3.26639900  | -0.17734200 | -0.07117700 |
| C | 0.50506400  | -1.62741800 | -0.49163400 |
| C | 2.25974200  | 0.90005900  | 0.39566900  |
| C | 0.43449400  | -0.41501300 | -0.48029200 |
| C | 0.92812500  | 0.96413500  | -0.39232100 |
| H | 2.57985200  | -1.55506500 | 1.49002500  |
| H | 3.23507300  | -0.25728500 | -1.16984600 |
| H | 2.00006200  | 0.74565500  | 1.45341300  |
| H | 4.18135500  | -1.89498300 | 0.86636100  |
| H | 4.26861200  | 0.20969100  | 0.16226000  |
| H | 2.71868700  | 1.89726800  | 0.32380100  |
| H | 1.14070700  | 1.32136700  | -1.41979200 |
| C | 2.63125000  | -2.76076700 | -0.32238800 |
| H | 3.08077600  | -3.70971500 | 0.00749500  |
| H | 2.95823700  | -2.60339900 | -1.36123000 |
| C | 1.08509500  | -2.94916900 | -0.31717900 |
| H | 0.76030200  | -3.37847400 | 0.64427900  |
| O | 0.05954000  | 1.88421900  | 0.27048800  |
| H | 0.78498300  | -3.65971900 | -1.10124400 |
| H | -0.85684400 | 1.68079200  | -0.02375800 |

|   |             |             |             |
|---|-------------|-------------|-------------|
| H | -1.83531700 | -0.18533300 | -0.60192200 |
| N | -3.50658100 | 0.29261500  | 0.26491600  |
| C | -3.44238700 | 1.23430000  | 1.38097200  |
| H | -3.50491500 | 2.28948100  | 1.05202200  |
| H | -4.28478500 | 1.02028800  | 2.05199500  |
| H | -2.50794200 | 1.08223400  | 1.93186100  |
| C | -4.70760200 | 0.50214600  | -0.54019900 |
| H | -5.57926700 | 0.27895600  | 0.08928100  |
| H | -4.79103900 | 1.53906200  | -0.91788200 |
| H | -4.69994600 | -0.19041300 | -1.38873900 |
| O | -2.38157500 | 0.63075000  | -0.62251600 |
| C | 3.16619800  | -1.60476300 | 0.55893400  |

**DIFO (*anti*-RC)**

$E = -3925.21$

$H = -3757.00$

$G = -3794.52$

$N_{\text{imag}} = 0$

|   |             |             |             |
|---|-------------|-------------|-------------|
| C | -2.19337900 | -2.08904700 | 0.32872200  |
| C | -1.52094700 | -2.67579300 | -0.95222000 |
| C | -0.19889300 | -0.05529200 | 0.12021900  |
| C | -0.02351400 | -3.05044900 | -0.88680900 |
| C | 0.62396900  | -0.70864200 | -0.49035500 |
| C | 0.96244400  | -1.92459400 | -1.22555900 |
| H | -3.13865500 | -2.63067100 | 0.47475000  |
| H | -2.05379100 | -3.60279400 | -1.20572300 |
| H | 0.19757900  | -3.86216500 | -1.59503800 |
| H | -1.58050200 | -2.32590200 | 1.21317500  |
| H | -1.68708200 | -2.00256400 | -1.80660500 |
| H | 0.23901500  | -3.41262500 | 0.11730200  |
| F | 2.25411700  | -2.35849300 | -0.96253300 |
| C | -2.54662500 | -0.58198300 | 0.33448300  |
| H | -2.86600900 | -0.28271800 | -0.67464300 |
| H | -3.40547300 | -0.41011800 | 0.99990200  |
| C | -1.40533000 | 0.37230000  | 0.79554600  |
| H | -1.65649000 | 1.41881800  | 0.57533100  |
| H | -1.26123800 | 0.30152100  | 1.88487900  |
| F | 0.92627700  | -1.67282200 | -2.59639600 |
| H | 2.08158500  | 0.95021500  | 0.03584100  |
| N | 1.56204500  | 2.46942800  | 1.07947600  |
| C | 2.06741600  | 2.61123500  | 2.44399100  |
| H | 1.33754600  | 3.18968400  | 3.02673500  |
| H | 3.04601400  | 3.12685900  | 2.47854800  |
| H | 2.17374100  | 1.61795600  | 2.89366000  |
| C | 1.44950200  | 3.76825600  | 0.41718800  |
| H | 2.41150200  | 4.31480100  | 0.39745900  |

|   |            |            |             |
|---|------------|------------|-------------|
| H | 0.70661200 | 4.37097600 | 0.95746100  |
| H | 1.10484900 | 3.61883600 | -0.61187900 |
| O | 2.58507200 | 1.73359900 | 0.34895100  |

**N-COT (*anti*-RC)**

$E = -3794.69$

$H = -3624.49$

$G = -3659.68$

$N_{\text{imag}} = 0$

|   |             |             |             |
|---|-------------|-------------|-------------|
| N | 2.40059068  | 2.09909294  | -2.66733896 |
| C | 2.36525430  | 1.79219761  | -4.09593312 |
| O | 1.00803203  | 2.31918061  | -2.27551526 |
| C | 3.08704697  | 3.36614507  | -2.42041315 |
| H | 3.39719566  | 1.65480414  | -4.44684611 |
| H | 1.88696021  | 2.59611737  | -4.68807543 |
| H | 1.81216113  | 0.85934136  | -4.25123608 |
| H | 0.87953802  | 1.65131654  | -1.56656805 |
| H | 3.06141332  | 3.58710477  | -1.34769471 |
| H | 2.62737739  | 4.20877857  | -2.97185387 |
| H | 4.13423969  | 3.26039456  | -2.73549608 |
| C | -1.31773640 | -0.65174468 | 0.00000000  |
| H | -2.04259558 | -0.15464064 | 0.65895143  |
| C | 0.00000000  | 0.00000000  | 0.00000000  |
| C | 1.21586686  | -0.00000000 | 0.00000000  |
| C | 2.56403981  | -0.54693170 | 0.00601694  |
| C | 2.43058561  | -2.04692534 | -0.38191693 |
| C | 1.33362882  | -2.83538968 | 0.37525907  |
| C | -0.12606672 | -2.85862265 | -0.20084085 |
| N | -1.19076017 | -2.05486844 | 0.43025191  |
| H | -1.74702271 | -0.62584300 | -1.01433621 |
| H | 3.01276764  | -0.44859127 | 1.00771520  |
| H | 3.22520199  | -0.02420269 | -0.69995088 |
| H | 3.40689880  | -2.52874279 | -0.21694256 |
| H | 2.23316242  | -2.10612152 | -1.46309915 |
| H | 1.29857313  | -2.50759836 | 1.42710405  |
| H | 1.66496419  | -3.88438309 | 0.40717909  |
| H | -0.47477115 | -3.90058330 | -0.14204168 |
| H | -0.10834036 | -2.60238193 | -1.27068899 |
| H | -1.08428962 | -2.08530696 | 1.44562212  |

**O-COT (*anti*-RC)**

$E = -3670.40$

$H = -3508.14$

$G = -3543.14$

$N_{\text{imag}} = 0$

|   |            |            |             |
|---|------------|------------|-------------|
| N | 2.28195927 | 2.07347919 | -2.73714879 |
|---|------------|------------|-------------|

|   |             |             |             |
|---|-------------|-------------|-------------|
| C | 2.36212123  | 1.71311913  | -4.15132807 |
| O | 0.85256208  | 2.18357212  | -2.44045880 |
| C | 2.84136229  | 3.40438373  | -2.50302872 |
| H | 3.42187738  | 1.65517624  | -4.43455247 |
| H | 1.85461190  | 2.44985682  | -4.80332927 |
| H | 1.90192394  | 0.73018497  | -4.30053756 |
| H | 0.74620573  | 1.56111205  | -1.68904449 |
| H | 2.72847240  | 3.66202024  | -1.44424047 |
| H | 2.34844363  | 4.18224769  | -3.11694532 |
| H | 3.91188510  | 3.37828912  | -2.74868300 |
| C | -1.28888936 | -0.69140361 | 0.00000000  |
| H | -1.99300430 | -0.29667258 | 0.74392042  |
| C | 0.00000000  | 0.00000000  | 0.00000000  |
| C | 1.21471689  | 0.00000000  | 0.00000000  |
| C | 2.57312168  | -0.51452126 | -0.01693260 |
| C | 2.46686676  | -1.99613733 | -0.48541174 |
| C | 1.35071339  | -2.83545341 | 0.18127259  |
| C | -0.08655133 | -2.77075392 | -0.41688237 |
| O | -1.07739247 | -2.06719971 | 0.36121113  |
| H | -1.76751666 | -0.61797981 | -0.99484260 |
| H | 3.01430925  | -0.45925152 | 0.99087058  |
| H | 3.22374833  | 0.05585576  | -0.69473546 |
| H | 3.44002456  | -2.47705037 | -0.30397891 |
| H | 2.31543727  | -2.00071481 | -1.57553647 |
| H | 1.28228892  | -2.60837186 | 1.25569422  |
| H | 1.66550948  | -3.88813196 | 0.11820522  |
| H | -0.48532990 | -3.79312697 | -0.46507661 |
| H | -0.06091018 | -2.37474995 | -1.44650725 |

**S-COT (*anti*-RC)**

$E = -3615.44$

$H = -3454.87$

$G = -3490.82$

$N_{\text{imag}} = 0$

|   |             |             |             |
|---|-------------|-------------|-------------|
| N | 2.58454291  | 2.04837421  | -2.63224271 |
| C | 2.65272362  | 1.69913497  | -4.05012004 |
| O | 1.16316768  | 2.24750179  | -2.34270799 |
| C | 3.22540938  | 3.33816034  | -2.37871411 |
| H | 3.70886224  | 1.57588300  | -4.32598671 |
| H | 2.19899581  | 2.47415694  | -4.69717962 |
| H | 2.13162122  | 0.74946613  | -4.21384944 |
| H | 1.00142745  | 1.60337528  | -1.61966392 |
| H | 3.12203152  | 3.59011759  | -1.31758979 |
| H | 2.78679076  | 4.15281816  | -2.98604222 |
| H | 4.29360616  | 3.24715937  | -2.61869150 |
| C | -1.37036892 | -0.45638009 | -0.00000000 |

|   |             |             |             |
|---|-------------|-------------|-------------|
| H | -2.01301192 | 0.07490143  | 0.71467397  |
| C | 0.00000000  | 0.00000000  | 0.00000000  |
| C | 1.21418466  | -0.00000000 | 0.00000000  |
| C | 2.59167955  | -0.46512453 | 0.07415057  |
| C | 2.59937479  | -1.99485013 | -0.20808834 |
| C | 1.49392424  | -2.79887351 | 0.51643920  |
| C | 0.13066336  | -2.91959696 | -0.22683810 |
| S | -1.37695737 | -2.23219810 | 0.57451107  |
| H | -1.82976153 | -0.38583332 | -0.99590574 |
| H | 2.99413523  | -0.26511453 | 1.08015858  |
| H | 3.23650522  | 0.06240377  | -0.64383213 |
| H | 3.58691931  | -2.38497060 | 0.08021713  |
| H | 2.50919398  | -2.15169270 | -1.29362085 |
| H | 1.32582268  | -2.38507025 | 1.52076883  |
| H | 1.87277381  | -3.81988526 | 0.67008653  |
| H | -0.14066488 | -3.97868237 | -0.33367531 |
| H | 0.18938704  | -2.51005070 | -1.24371785 |

### Propyne (*anti*-TS)

$E = -2198.07$

$H = -2100.00$

$G = -2127.16$

$N_{\text{imag}} = 1, \nu = -433.649 \text{ i cm}^{-1}$

|   |             |             |             |
|---|-------------|-------------|-------------|
| C | 0.00000000  | -0.00000000 | -0.00000000 |
| C | 1.25439729  | 0.00000000  | -0.00000000 |
| C | -1.25302161 | -0.79015769 | 0.00003235  |
| N | 1.72224032  | 2.01173737  | -0.00010215 |
| C | 2.43778278  | 2.35260977  | 1.23145607  |
| H | 3.39574449  | 1.81495370  | 1.25192902  |
| H | 2.62582730  | 3.43621070  | 1.29325024  |
| C | 2.43765458  | 2.35250971  | -1.23176501 |
| H | 3.39559761  | 1.81482312  | -1.25231809 |
| H | 2.62572384  | 3.43610078  | -1.29364598 |
| O | 0.44902284  | 2.51094349  | -0.00006351 |
| H | -0.08908716 | 1.51196064  | -0.00002931 |
| H | 1.82403687  | 2.03855952  | -2.08098509 |
| H | 1.82427817  | 2.03869189  | 2.08076937  |
| H | 2.24979206  | -0.41396723 | 0.00001051  |
| H | -1.86519521 | -0.54078416 | 0.87893583  |
| H | -1.07666919 | -1.87554145 | 0.00005119  |
| H | -1.86522030 | -0.54081561 | -0.87886269 |

### 2-butyne (TS)

$E = -2577.69$

$H = -2461.83$

$G = -2491.48$



$N_{\text{imag}} = 1, v = -642.9501 \text{ i cm}^{-1}$

|   |             |             |             |
|---|-------------|-------------|-------------|
| C | 0.00000000  | 0.00000000  | 0.00000000  |
| C | 1.25806856  | -0.00000000 | 0.00000000  |
| C | -1.21661784 | -0.85326113 | -0.01286097 |
| N | 1.56707094  | 2.14212454  | 0.03251139  |
| C | 2.23795225  | 2.55060091  | 1.27020514  |
| H | 3.26532408  | 2.16325402  | 1.27776922  |
| H | 2.26524733  | 3.64871940  | 1.35926368  |
| C | 2.23744801  | 2.58844079  | -1.19241693 |
| H | 3.26478587  | 2.20149592  | -1.21235298 |
| H | 2.26463300  | 3.68877429  | -1.24785937 |
| O | 0.25349838  | 2.50520742  | 0.03828783  |
| H | -0.18684918 | 1.40810118  | 0.02147135  |
| H | 1.67939308  | 2.19795727  | -2.04885826 |
| H | 1.68024453  | 2.13418297  | 2.11447903  |
| C | 2.60800038  | -0.57224931 | -0.00859550 |
| H | -1.84112781 | -0.65161362 | 0.86970348  |
| H | -0.98306977 | -1.92787957 | -0.02885847 |
| H | -1.84082065 | -0.62543159 | -0.88931483 |
| H | 3.18667958  | -0.26344484 | -0.89173995 |
| H | 2.54574647  | -1.67231992 | -0.02531429 |
| H | 3.18628773  | -0.29043558 | 0.88387893  |

### COT (TS)

$E = -3900.40$

$H = -3724.73$

$G = -3758.90$

$N_{\text{imag}} = 1, v = -501.381 \text{ i cm}^{-1}$

|   |             |             |             |
|---|-------------|-------------|-------------|
| C | -2.52141400 | -1.17294300 | 0.28396700  |
| C | -2.98288600 | 0.21386200  | 0.79813500  |
| C | 0.35911900  | -0.03103600 | 0.25495500  |
| C | -2.47573700 | 1.48226500  | 0.08234300  |
| C | 0.03530100  | 1.17903500  | 0.36000200  |
| C | -1.13689600 | 2.06924700  | 0.56606200  |
| H | -3.35158300 | -1.87066400 | 0.47108200  |
| H | -4.08029000 | 0.22725600  | 0.71521800  |
| H | -3.23687000 | 2.27001100  | 0.20324700  |
| H | -2.40779700 | -1.13886200 | -0.81263000 |
| H | -2.77015500 | 0.29045700  | 1.87808600  |
| H | -2.40893000 | 1.28671100  | -1.00009100 |
| H | -0.97328000 | 3.03710700  | 0.06631500  |
| C | -1.26516700 | -1.80626200 | 0.91562700  |
| H | -1.21196800 | -1.52684500 | 1.97947800  |
| H | -1.37080800 | -2.90220100 | 0.88796800  |
| C | 0.08743500  | -1.47218000 | 0.24675900  |
| H | 0.87946000  | -2.02931500 | 0.77272800  |

|   |             |             |             |
|---|-------------|-------------|-------------|
| H | 0.08406500  | -1.85379100 | -0.78956900 |
| H | -1.20969300 | 2.30866200  | 1.64167900  |
| H | 1.36670600  | 1.73303700  | 0.14331300  |
| N | 2.46787600  | 0.21527400  | -0.13043700 |
| C | 2.80683300  | -0.27162300 | -1.47044800 |
| H | 2.68121000  | -1.36184200 | -1.50551600 |
| H | 3.84653100  | -0.01650900 | -1.73310900 |
| H | 2.12732400  | 0.19977300  | -2.18673800 |
| C | 3.27739100  | -0.36353100 | 0.94476500  |
| H | 4.34152300  | -0.10476400 | 0.82091700  |
| H | 3.17070100  | -1.45633900 | 0.93811300  |
| H | 2.91701300  | 0.03600100  | 1.89751300  |
| O | 2.49001700  | 1.58157300  | -0.08035700 |

**DIBO (*anti*-TS)**

$E = -5526.76$

$H = -5319.37$

$G = -5359.34$

$N_{\text{imag}} = 1, \nu = -635.6285 \text{ i cm}^{-1}$

|   |             |             |             |
|---|-------------|-------------|-------------|
| C | -0.49754700 | 1.48729600  | 0.46596500  |
| C | 0.42192700  | 1.43572200  | 1.74043500  |
| C | -0.53170700 | -1.38986600 | 0.97076300  |
| C | 1.78870600  | 0.87813500  | 1.45675700  |
| C | 0.73731400  | -1.27915000 | 0.99515900  |
| C | 1.93083000  | -0.48935200 | 1.06590900  |
| H | 0.06522200  | 1.06683700  | -0.38064300 |
| H | -3.03445300 | 2.47016800  | 0.34560100  |
| C | -1.79209800 | 0.73495800  | 0.60377800  |
| H | -0.71121100 | 2.53358200  | 0.21072400  |
| H | -5.17583500 | 1.23171100  | 0.53125800  |
| C | -1.77796200 | -0.67064000 | 0.82418100  |
| C | 3.21887000  | -0.96670800 | 0.75199300  |
| C | 4.33750300  | -0.14171200 | 0.82666900  |
| C | 4.19674200  | 1.18999900  | 1.22083800  |
| C | 2.92718800  | 1.68549300  | 1.52398200  |
| H | 3.33568700  | -1.99780400 | 0.42967600  |
| H | 5.32058100  | -0.53935500 | 0.57410100  |
| H | 5.06852000  | 1.84078900  | 1.28813700  |
| H | 2.81106300  | 2.72869900  | 1.82381000  |
| C | -3.00428600 | -1.35783300 | 0.92305200  |
| C | -4.21890700 | -0.68602800 | 0.81837700  |
| C | -4.23013200 | 0.69549600  | 0.61402000  |
| C | -3.02307400 | 1.39110000  | 0.51104300  |
| H | -2.98672300 | -2.43537900 | 1.08795100  |
| H | -5.15552900 | -1.23804700 | 0.89781700  |
| H | 0.52105300  | 2.44425900  | 2.16243000  |

|   |             |             |             |
|---|-------------|-------------|-------------|
| H | -0.07303700 | 0.81663000  | 2.50233000  |
| H | -0.64700600 | -2.73896100 | 1.24489600  |
| N | 1.13364800  | -3.43744100 | 1.40981200  |
| C | 1.77070300  | -4.17012300 | 0.30474900  |
| H | 2.83379300  | -3.91042900 | 0.24130500  |
| H | 1.67502600  | -5.25485100 | 0.46824900  |
| H | 1.26698300  | -3.89827700 | -0.62764400 |
| C | 1.82494500  | -3.55467800 | 2.70016500  |
| H | 1.90062200  | -4.61015100 | 3.00717200  |
| H | 2.82833400  | -3.11944700 | 2.61900300  |
| H | 1.24658100  | -3.00168200 | 3.44550300  |
| O | -0.16956600 | -3.80058500 | 1.50847200  |

**BCN (*anti*-TS)**

$E = -4086.21$

$H = -3906.79$

$G = -3940.87$

$N_{\text{imag}} = 1, \nu = -359.8539 \text{ i cm}^{-1}$

|   |             |             |             |
|---|-------------|-------------|-------------|
| C | 1.89815200  | 1.02354700  | 0.81597800  |
| C | 1.71023400  | -0.47942800 | 0.93963200  |
| C | -1.02096400 | 1.20436000  | -0.18082600 |
| C | 1.03183600  | -1.33375900 | -0.11120300 |
| C | -1.08762500 | -0.04556900 | -0.08419400 |
| C | -0.51056900 | -1.39075300 | 0.03473700  |
| H | 1.27720500  | -0.96633900 | -1.11803000 |
| H | 1.42393700  | -2.36241400 | -0.05042700 |
| H | -0.91731700 | -2.06985700 | -0.73189500 |
| H | -0.76720400 | -1.83792600 | 1.01049100  |
| C | 1.42810100  | 1.84361500  | -0.36841000 |
| H | 1.54584600  | 1.26919200  | -1.29962100 |
| H | 2.08034200  | 2.72790200  | -0.46746100 |
| C | -0.03771500 | 2.31653500  | -0.25705100 |
| H | -0.27699500 | 2.97110200  | -1.11048500 |
| H | -0.15365700 | 2.95671400  | 0.63448700  |
| C | 3.08913100  | 0.09635900  | 0.70319800  |
| H | 3.82167200  | 0.06921300  | 1.50867700  |
| H | 1.81976300  | 1.55816200  | 1.76637400  |
| H | 1.52133300  | -0.82249900 | 1.96034200  |
| H | 3.51400200  | -0.03769100 | -0.29270700 |
| H | -3.35230700 | -1.87660500 | 1.33516100  |
| H | -4.78786700 | -0.80112800 | 1.33542300  |
| O | -3.55856300 | 1.04628900  | -0.13168500 |
| H | -3.24500000 | -0.23719500 | 2.04924800  |
| H | -2.50088400 | 1.44519900  | -0.17841200 |
| N | -3.24465600 | -0.28624000 | -0.03491100 |
| C | -3.72718300 | -1.02154300 | -1.20585000 |

|   |             |             |             |
|---|-------------|-------------|-------------|
| H | -3.39223000 | -2.06544900 | -1.14484100 |
| H | -4.82777000 | -0.99757100 | -1.26418000 |
| H | -3.30792700 | -0.55305900 | -2.10148000 |
| C | -3.68945200 | -0.83530900 | 1.24789800  |

**HO-COT (*anti*-TS)**

$E = -4049.61$

$H = -3869.99$

$G = -3905.74$

$N_{\text{imag}} = 1, \nu = -187.669 \text{ i cm}^{-1}$

|   |             |             |             |
|---|-------------|-------------|-------------|
| C | 3.06716100  | -0.59006800 | 0.08088900  |
| C | -0.36180100 | -0.34019100 | -0.16898400 |
| C | 2.57262100  | 0.79216000  | 0.53993900  |
| C | 0.16219600  | 0.80149500  | -0.19761400 |
| C | 1.48656900  | 1.45679500  | -0.31985100 |
| H | 1.82338400  | -1.74023700 | 1.45221600  |
| H | 3.24612100  | -0.57387100 | -1.00803900 |
| H | 2.21461200  | 0.74706300  | 1.57985100  |
| H | 2.95797300  | -2.68360500 | 0.50469400  |
| H | 4.06019100  | -0.72523200 | 0.53545500  |
| H | 3.42694300  | 1.48594400  | 0.53288500  |
| H | 1.79664900  | 1.38989500  | -1.38245600 |
| C | 1.12970900  | -2.29052700 | -0.53868400 |
| H | 1.09211800  | -3.39032100 | -0.56995200 |
| H | 1.38232800  | -1.96124400 | -1.55831200 |
| C | -0.29682300 | -1.80512200 | -0.19718500 |
| H | -0.59487000 | -2.22167000 | 0.78068900  |
| O | 1.47166200  | 2.85175700  | 0.06362300  |
| H | -1.00025200 | -2.22125900 | -0.93671600 |
| H | 0.59248100  | 3.19635900  | -0.16670700 |
| H | -1.18826800 | 1.56842500  | 0.00148000  |
| N | -2.41156400 | 0.15208700  | 0.12709900  |
| C | -2.89128700 | -0.32908200 | 1.42619200  |
| H | -3.89535000 | 0.06675700  | 1.64654700  |
| H | -2.92801900 | -1.42592600 | 1.41550100  |
| H | -2.19148300 | 0.00892900  | 2.19643000  |
| C | -3.23443100 | -0.26463100 | -1.01186700 |
| H | -3.28145400 | -1.36063800 | -1.04446700 |
| H | -4.25560600 | 0.13986300  | -0.92865200 |
| H | -2.76888100 | 0.11158400  | -1.92786300 |
| O | -2.27553100 | 1.52426500  | 0.14392400  |
| C | 2.24244600  | -1.85057300 | 0.43835100  |

**DIFO (*anti*-TS)**

$E = -3922.89$

$H = -3755.12$

$$G = -3791.36$$

$$N_{\text{imag}} = 1, \nu = -121.3245 \text{ i cm}^{-1}$$

|   |             |             |             |
|---|-------------|-------------|-------------|
| C | -2.44088700 | -1.15245900 | 0.15776400  |
| C | -3.04465000 | 0.19231600  | 0.62719700  |
| C | 0.39213400  | -0.01850900 | 0.38981300  |
| C | -2.45050900 | 1.51022000  | 0.10285900  |
| C | 0.04497300  | 1.18336200  | 0.46531200  |
| C | -1.14899800 | 1.99198900  | 0.74264700  |
| H | -3.26112000 | -1.88481800 | 0.17531600  |
| H | -4.09806200 | 0.19937000  | 0.30996300  |
| H | -3.17659600 | 2.31856700  | 0.27398200  |
| H | -2.13726200 | -1.07620000 | -0.89955800 |
| H | -3.06819100 | 0.22019600  | 1.72720300  |
| H | -2.28043300 | 1.45557400  | -0.98227900 |
| F | -0.95176600 | 3.31364300  | 0.31955600  |
| C | -1.28478600 | -1.74835500 | 0.99262700  |
| H | -1.35821800 | -1.39177000 | 2.03076900  |
| H | -1.39286200 | -2.84284500 | 1.03114300  |
| C | 0.13869600  | -1.45924400 | 0.46698200  |
| H | 0.87253000  | -1.95302700 | 1.12388800  |
| H | 0.25971800  | -1.91678700 | -0.52987700 |
| F | -1.33110700 | 2.08909300  | 2.12948300  |
| H | 1.46517000  | 1.78330300  | 0.05096600  |
| N | 2.43409600  | 0.19004600  | -0.19692700 |
| C | 2.67655300  | -0.37048600 | -1.52979000 |
| H | 2.57764400  | -1.46263800 | -1.48699800 |
| H | 3.68485300  | -0.11065700 | -1.88872300 |
| H | 1.93154300  | 0.04175200  | -2.21719800 |
| C | 3.33980200  | -0.31010400 | 0.84242500  |
| H | 4.38329700  | -0.03999600 | 0.61678800  |
| H | 3.25407700  | -1.40249100 | 0.90381600  |
| H | 3.04788000  | 0.13798000  | 1.79707800  |
| O | 2.48009500  | 1.56912000  | -0.24453500 |

### N-COT (*anti*-TS)

$$E = -3788.86$$

$$H = -3620.14$$

$$G = -3654.11$$

$$N_{\text{imag}} = 1, \nu = -411.14437 \text{ i cm}^{-1}$$

|   |            |            |             |
|---|------------|------------|-------------|
| N | 1.60985056 | 2.12292626 | 0.10787807  |
| C | 2.28362907 | 2.61491815 | -1.09586670 |
| O | 0.29595128 | 2.51249289 | 0.12676128  |
| C | 2.28110454 | 2.47224575 | 1.36223928  |
| H | 3.30671885 | 2.21786059 | -1.13167320 |
| H | 2.32425747 | 3.71625491 | -1.10451020 |
| H | 1.72294483 | 2.26712121 | -1.96875233 |

|   |             |             |             |
|---|-------------|-------------|-------------|
| H | -0.16797954 | 1.47631864  | 0.06651520  |
| H | 1.71222678  | 2.03405288  | 2.18773214  |
| H | 2.33089722  | 3.56542213  | 1.49466501  |
| H | 3.29914270  | 2.06095510  | 1.35714683  |
| C | -1.16678604 | -0.93624941 | 0.00000000  |
| H | -1.99843749 | -0.50490878 | 0.57656617  |
| C | 0.00000000  | 0.00000000  | 0.00000000  |
| C | 1.25686272  | -0.00000000 | 0.00000000  |
| C | 2.56155383  | -0.66849092 | -0.03741852 |
| C | 2.44087668  | -2.10552964 | -0.59282422 |
| C | 1.53474849  | -3.07067127 | 0.19620444  |
| C | 0.02158858  | -3.14830883 | -0.16115822 |
| N | -0.94887581 | -2.28798670 | 0.51639288  |
| H | -1.54073250 | -1.02173506 | -1.03467957 |
| H | 3.00602504  | -0.70298579 | 0.97301846  |
| H | 3.27724257  | -0.11380744 | -0.66514156 |
| H | 3.45913125  | -2.52412993 | -0.62872210 |
| H | 2.09221650  | -2.05037393 | -1.63622004 |
| H | 1.63868673  | -2.88518565 | 1.27887046  |
| H | 1.93041404  | -4.08600677 | 0.03494180  |
| H | -0.29131708 | -4.18459239 | 0.04578950  |
| H | -0.10680730 | -3.00381967 | -1.24596787 |
| H | -0.75239632 | -2.25063796 | 1.51747949  |

### O-COT (*anti*-TS)

$$E = -3666.75$$

$$H = -3505.39$$

$$G = -3538.98$$

$$N_{\text{imag}} = 1, \nu = -189.76681 \text{ i cm}^{-1}$$

|   |             |             |             |
|---|-------------|-------------|-------------|
| N | 1.64243108  | 2.11706296  | 0.11820876  |
| C | 2.31835918  | 2.61989044  | -1.07955137 |
| O | 0.32913687  | 2.53685114  | 0.14084610  |
| C | 2.31324832  | 2.45353921  | 1.37640801  |
| H | 3.33759091  | 2.21396704  | -1.12083423 |
| H | 2.36989609  | 3.72073795  | -1.07338535 |
| H | 1.75483720  | 2.28879204  | -1.95706419 |
| H | -0.15187935 | 1.55414679  | 0.07997503  |
| H | 1.73963305  | 2.01498535  | 2.19832382  |
| H | 2.37389824  | 3.54526674  | 1.51505204  |
| H | 3.32682910  | 2.03189502  | 1.36972787  |
| C | -1.14665005 | -0.93073659 | -0.00000000 |
| H | -1.88683463 | -0.64435823 | 0.76025229  |
| C | 0.00000000  | -0.00000000 | -0.00000000 |
| C | 1.25413913  | 0.00000000  | -0.00000000 |
| C | 2.55560859  | -0.67884129 | -0.03237430 |
| C | 2.47929421  | -2.01723642 | -0.80302673 |

|   |             |             |             |
|---|-------------|-------------|-------------|
| C | 1.50384796  | -3.07924278 | -0.26495524 |
| C | 0.00905973  | -2.96607647 | -0.63726020 |
| O | -0.82055529 | -2.29287042 | 0.31495124  |
| H | -1.65750999 | -0.88197538 | -0.98243500 |
| H | 2.90740521  | -0.86668752 | 0.99699525  |
| H | 3.32628886  | -0.05360270 | -0.50908345 |
| H | 3.49410445  | -2.44542878 | -0.80525491 |
| H | 2.23206983  | -1.80101856 | -1.85465281 |
| H | 1.57705787  | -3.15587760 | 0.83121827  |
| H | 1.84268902  | -4.05108043 | -0.65821775 |
| H | -0.40211634 | -3.98541930 | -0.69209594 |
| H | -0.10569916 | -2.50920593 | -1.63715815 |

**S-COT (*anti*-TS)**

$E = -3606.88$

$H = -3447.81$

$G = -3482.93$

$N_{\text{imag}} = 1, \nu = -438.34745 \text{ i cm}^{-1}$

|   |             |             |             |
|---|-------------|-------------|-------------|
| N | 1.60480584  | 2.09299373  | 0.07367551  |
| C | 2.29139894  | 2.56219162  | -1.13424516 |
| O | 0.30018164  | 2.50057263  | 0.08263602  |
| C | 2.27920696  | 2.44610226  | 1.32795409  |
| H | 3.30778404  | 2.14858324  | -1.16587164 |
| H | 2.35007812  | 3.66192842  | -1.14771105 |
| H | 1.72473856  | 2.21859323  | -2.00461047 |
| H | -0.17474296 | 1.45437787  | 0.03786130  |
| H | 1.69750709  | 2.03043755  | 2.15578005  |
| H | 2.34729684  | 3.53964267  | 1.44158913  |
| H | 3.28928943  | 2.01636235  | 1.33323868  |
| C | -1.17973976 | -0.88381786 | -0.00000000 |
| H | -1.99866531 | -0.47250773 | 0.60771068  |
| C | -0.00000000 | 0.00000000  | 0.00000000  |
| C | 1.25973474  | 0.00000000  | 0.00000000  |
| C | 2.57635374  | -0.65382891 | 0.00738442  |
| C | 2.59381838  | -2.02687533 | -0.70367791 |
| C | 1.80176834  | -3.17621021 | -0.05454779 |
| C | 0.30569541  | -3.31306305 | -0.40879845 |
| S | -0.93732958 | -2.56851496 | 0.71135096  |
| H | -1.57706070 | -0.98947200 | -1.02190580 |
| H | 2.92339659  | -0.78052283 | 1.04777464  |
| H | 3.32936803  | -0.01895423 | -0.48547528 |
| H | 3.65010296  | -2.33317883 | -0.75888540 |
| H | 2.25874670  | -1.89186634 | -1.74426734 |
| H | 1.91376694  | -3.14526100 | 1.03998378  |
| H | 2.28150500  | -4.11314040 | -0.38063322 |
| H | 0.03742413  | -4.37815948 | -0.38536141 |

H 0.10391544 -2.96298166 -1.43215946

**Propyne (*anti*-P)**

$E = -2224.43$

$H = -2122.96$

$G = -2149.16$

$N_{\text{imag}} = 0$

|   |             |             |             |
|---|-------------|-------------|-------------|
| C | 0.00000000  | -0.00000000 | -0.00000000 |
| C | 1.32535282  | -0.00000000 | -0.00000000 |
| C | -0.86212487 | -1.22109441 | -0.00000000 |
| N | 2.06351211  | 1.31592188  | -0.00001639 |
| C | 2.94467295  | 1.33734705  | 1.23294895  |
| H | 3.61904709  | 0.47031400  | 1.25880680  |
| H | 3.50612719  | 2.27513953  | 1.19695283  |
| C | 2.94462341  | 1.33734290  | -1.23301753 |
| H | 3.61899035  | 0.47030469  | -1.25890769 |
| H | 3.50608425  | 2.27513133  | -1.19704364 |
| O | 1.25160995  | 2.39504618  | -0.00000350 |
| H | -0.45436393 | 0.99685773  | -0.00000283 |
| H | 2.26927382  | 1.33696915  | -2.09164303 |
| H | 2.26935926  | 1.33696805  | 2.09160278  |
| H | 1.97099955  | -0.87909252 | 0.00000108  |
| H | -1.52192294 | -1.22808933 | 0.88057920  |
| H | -0.27746900 | -2.14998305 | -0.00000850 |
| H | -1.52193199 | -1.22807885 | -0.88057115 |

**2-butyne (P)**

$E = -2600.43$

$H = -2480.99$

$G = -2509.82$

$N_{\text{imag}} = 0$

|   |             |             |             |
|---|-------------|-------------|-------------|
| C | 0.00000000  | 0.00000000  | 0.00000000  |
| C | 1.33136785  | 0.00000000  | 0.00000000  |
| C | -0.90970903 | -1.18488116 | -0.00989076 |
| N | 1.96588880  | 1.41707439  | 0.01184244  |
| C | 2.82892135  | 1.54401616  | 1.24773000  |
| H | 3.63269138  | 0.79710022  | 1.26869608  |
| H | 3.23855600  | 2.55741020  | 1.22792012  |
| C | 2.83042620  | 1.56397321  | -1.22083558 |
| H | 3.63443454  | 0.81768505  | -1.25267811 |
| H | 3.23955805  | 2.57702680  | -1.18433293 |
| O | 1.05392642  | 2.41308053  | 0.01940486  |
| H | -0.43272153 | 1.00710677  | 0.00829975  |
| H | 2.16244191  | 1.46388713  | -2.07980539 |
| H | 2.15988025  | 1.43033434  | 2.10404480  |
| C | 2.25973211  | -1.17484977 | -0.01013483 |



|   |             |             |             |
|---|-------------|-------------|-------------|
| H | -1.57060422 | -1.16717292 | 0.87007218  |
| H | -0.38364176 | -2.14815830 | -0.01760120 |
| H | -1.57020163 | -1.15279185 | -0.88970789 |
| H | 2.90971828  | -1.19474725 | -0.89694616 |
| H | 1.67747506  | -2.10419168 | -0.01645501 |
| H | 2.91214391  | -1.20830431 | 0.87449547  |

**COT (P)**

$E = -3919.32$

$H = -3740.07$

$G = -3772.57$

$N_{\text{imag}} = 0$

|   |             |             |             |
|---|-------------|-------------|-------------|
| C | -2.34866600 | -1.35009300 | 0.80270800  |
| C | -2.71945800 | 0.11293700  | 1.08940900  |
| C | 0.61941100  | 0.29132900  | -0.02909700 |
| C | -2.46907100 | 1.11407500  | -0.06453800 |
| C | 0.12523000  | 1.50332400  | 0.20461200  |
| C | -1.26853200 | 2.04930400  | 0.12883400  |
| H | -2.79436100 | -1.97881900 | 1.58963600  |
| H | -3.78931900 | 0.13185600  | 1.34376200  |
| H | -3.35378300 | 1.75893100  | -0.17169300 |
| H | -2.83406700 | -1.65888400 | -0.13923300 |
| H | -2.19125900 | 0.45534600  | 1.99445300  |
| H | -2.38782100 | 0.57581400  | -1.02063700 |
| H | -1.27299900 | 2.80438200  | -0.67781800 |
| C | -0.85699500 | -1.69645800 | 0.72887800  |
| H | -0.38045100 | -1.47182900 | 1.69498900  |
| H | -0.77711600 | -2.78579200 | 0.59100300  |
| C | -0.05690300 | -1.00166400 | -0.40756300 |
| H | 0.69434400  | -1.71089300 | -0.77710700 |
| H | -0.72225200 | -0.82944500 | -1.26623400 |
| H | -1.43336300 | 2.63959900  | 1.04794000  |
| H | 0.91618700  | 2.21133900  | 0.49057700  |
| N | 2.18229100  | 0.23431200  | 0.14905300  |
| C | 2.78952900  | -0.10593200 | -1.19490700 |
| H | 2.41003600  | -1.05095700 | -1.60289600 |
| H | 3.87054500  | -0.15771600 | -1.03772700 |
| H | 2.54939400  | 0.73127000  | -1.85409900 |
| C | 2.51382000  | -0.84447800 | 1.15360300  |
| H | 3.60492800  | -0.87729800 | 1.21986400  |
| H | 2.11093700  | -1.82320800 | 0.86589800  |
| H | 2.09670500  | -0.51013600 | 2.10631900  |
| O | 2.72404100  | 1.39405100  | 0.57312800  |

**DIBO (P)**

$E = -5540.19$

$H = -5329.38$

$G = -5368.70$

$N_{\text{imag}} = 0$

|   |             |             |             |
|---|-------------|-------------|-------------|
| C | -0.67747200 | 1.31547900  | 2.24969900  |
| C | 0.66294800  | 0.68688800  | 2.68715300  |
| C | -0.74231400 | -1.77250800 | 1.40815400  |
| C | 1.58795100  | 0.39351300  | 1.53341700  |
| C | 0.58509300  | -1.87375300 | 1.35358400  |
| C | 1.53320000  | -0.85258900 | 0.86197200  |
| H | -0.48092700 | 2.35285800  | 1.94019700  |
| H | -2.30542500 | 2.61833300  | 0.67668500  |
| C | -1.50817400 | 0.67625200  | 1.14291800  |
| H | -1.31586600 | 1.39172400  | 3.14680300  |
| H | -3.92741200 | 1.82745600  | -1.00703900 |
| C | -1.58404700 | -0.70344100 | 0.83542200  |
| C | 2.34063400  | -1.04779400 | -0.27415400 |
| C | 3.21428800  | -0.05755000 | -0.71835100 |
| C | 3.29647600  | 1.15470600  | -0.03093500 |
| C | 2.48046800  | 1.37266300  | 1.07818600  |
| H | 2.25917000  | -1.97530500 | -0.83852500 |
| H | 3.82274900  | -0.23004400 | -1.60614900 |
| H | 3.98368600  | 1.93198900  | -0.36555000 |
| H | 2.52987500  | 2.32737100  | 1.60546900  |
| C | -2.54833600 | -1.14065300 | -0.09762400 |
| C | -3.38649700 | -0.25495200 | -0.76424500 |
| C | -3.28636100 | 1.11073800  | -0.49343300 |
| C | -2.36455400 | 1.55170600  | 0.45091000  |
| H | -2.61644700 | -2.20949600 | -0.30425700 |
| H | -4.11036800 | -0.62747100 | -1.48910200 |
| H | 1.14817900  | 1.39724700  | 3.37248800  |
| H | 0.46730500  | -0.22715400 | 3.25923200  |
| H | -1.21788600 | -2.66141700 | 1.85041000  |
| N | 1.12567900  | -3.20432000 | 2.01542500  |
| C | 1.81983500  | -4.03559200 | 0.96151400  |
| H | 2.69239100  | -3.51825400 | 0.54875200  |
| H | 2.11573000  | -4.96196600 | 1.46184700  |
| H | 1.07752900  | -4.25116900 | 0.18931600  |
| C | 2.12745600  | -2.81299500 | 3.07675300  |
| H | 2.52409200  | -3.74614700 | 3.48659800  |
| H | 2.92556500  | -2.18753900 | 2.65948800  |
| H | 1.56925400  | -2.28090200 | 3.85038600  |
| O | 0.14643600  | -3.93875200 | 2.57115000  |

**BCN (P)**

$E = -4101.05$

$H = -3918.31$

$G = -3951.76$

$N_{\text{imag}} = 0$

|   |             |             |             |
|---|-------------|-------------|-------------|
| C | 1.95527600  | 1.05430400  | 0.82046400  |
| C | 1.69060400  | -0.42597200 | 0.97043500  |
| C | -1.18827700 | 1.35215700  | -0.17076200 |
| C | 0.89437500  | -1.18588600 | -0.06573900 |
| C | -1.42251300 | 0.05152800  | -0.02808300 |
| C | -0.62091500 | -1.20272000 | 0.19942200  |
| H | 1.09610300  | -0.80088800 | -1.07469100 |
| H | 1.23384800  | -2.23441100 | -0.06987600 |
| H | -1.04598100 | -2.01375100 | -0.41112000 |
| H | -0.76538000 | -1.52811500 | 1.24467100  |
| C | 1.42989900  | 1.80975400  | -0.37770100 |
| H | 1.53255400  | 1.20220900  | -1.28872200 |
| H | 2.06295000  | 2.69706000  | -0.54157300 |
| C | -0.01782500 | 2.29250600  | -0.23389800 |
| H | -0.23215300 | 2.98321200  | -1.06683600 |
| H | -0.08885000 | 2.93372400  | 0.66445100  |
| C | 3.08852400  | 0.06505500  | 0.66670800  |
| H | 3.84428800  | 0.00418600  | 1.44814200  |
| H | 1.94942100  | 1.63130000  | 1.74824200  |
| H | 1.52703000  | -0.77632800 | 1.99264200  |
| H | 3.47006500  | -0.10168900 | -0.34147500 |
| H | -2.90037800 | -1.96444900 | 1.23398300  |
| H | -4.48734300 | -1.11715700 | 1.13264900  |
| O | -3.75566800 | 0.90145300  | -0.11123000 |
| H | -3.13838000 | -0.36157400 | 2.03085300  |
| H | -2.16436500 | 1.86855100  | -0.24480500 |
| N | -3.01723800 | -0.22252700 | -0.06152200 |
| C | -3.32621800 | -1.03788000 | -1.29463800 |
| H | -2.79427400 | -1.99701100 | -1.30949800 |
| H | -4.40796600 | -1.19921000 | -1.29281400 |
| H | -3.04519900 | -0.41917900 | -2.14984300 |
| C | -3.40203600 | -0.99124500 | 1.17725200  |

**HO-COT (*anti*-P)**

$E = -4067.23$

$H = -3884.74$

$G = -3919.00$

$N_{\text{imag}} = 0$

|   |             |             |             |
|---|-------------|-------------|-------------|
| C | 2.95495800  | -0.64060000 | 0.58502600  |
| C | -0.68553000 | -0.13330400 | -0.23371400 |
| C | 2.46777800  | 0.81346200  | 0.62010600  |
| C | 0.05870100  | 0.96515900  | -0.15271800 |
| C | 1.49801200  | 1.22233700  | -0.50548900 |
| H | 1.16832100  | -1.55511500 | 1.41518400  |

|   |             |             |             |
|---|-------------|-------------|-------------|
| H | 3.59036700  | -0.78592300 | -0.30489800 |
| H | 1.99597000  | 1.03867200  | 1.58860100  |
| H | 2.37960200  | -2.69143600 | 0.84443800  |
| H | 3.61670100  | -0.78659800 | 1.45228900  |
| H | 3.34017000  | 1.47755400  | 0.53265800  |
| H | 1.78203800  | 0.69498600  | -1.43288500 |
| C | 1.11788000  | -1.91788500 | -0.73975800 |
| H | 1.15565200  | -2.97228700 | -1.05032600 |
| H | 1.63240800  | -1.36442400 | -1.53688100 |
| C | -0.37029600 | -1.52301700 | -0.71278800 |
| H | -0.89881400 | -2.25355900 | -0.07971600 |
| O | 1.70118900  | 2.63765100  | -0.71124000 |
| H | -0.78437800 | -1.66786000 | -1.72534300 |
| H | 0.93306900  | 2.97765700  | -1.20162600 |
| H | -0.50484500 | 1.81324800  | 0.26799800  |
| N | -2.15704900 | 0.10904200  | 0.27065700  |
| C | -2.37555100 | -0.70746100 | 1.52551700  |
| H | -3.40510000 | -0.51328300 | 1.83805300  |
| H | -2.21533400 | -1.78035000 | 1.36171200  |
| H | -1.68166200 | -0.31309100 | 2.27131800  |
| C | -3.10633200 | -0.35086800 | -0.81104000 |
| H | -2.97718700 | -1.41397400 | -1.04833100 |
| H | -4.11402200 | -0.15357200 | -0.43568100 |
| H | -2.90751600 | 0.27590100  | -1.68396400 |
| O | -2.42006800 | 1.39973900  | 0.55751200  |
| C | 1.88125900  | -1.74327000 | 0.59682100  |

**DIFO (*anti-P*)**

$E = -3939.04$

$H = -3768.82$

$G = -3803.78$

$N_{\text{imag}} = 0$

|   |             |             |             |
|---|-------------|-------------|-------------|
| C | -1.77502800 | -1.59030900 | 0.62506100  |
| C | -1.23269200 | -2.74916800 | -0.22763400 |
| C | 0.41450700  | 0.61356700  | 0.08940000  |
| C | 0.25492900  | -2.72240300 | -0.60361100 |
| C | 1.14452000  | -0.30458600 | -0.53073100 |
| C | 0.77078600  | -1.49479300 | -1.36004000 |
| H | -2.73039500 | -1.92082400 | 1.05664700  |
| H | -1.39651600 | -3.69298700 | 0.31376300  |
| H | 0.47296100  | -3.58584500 | -1.24822700 |
| H | -1.10573800 | -1.41008900 | 1.48190000  |
| H | -1.83249900 | -2.81923200 | -1.14749200 |
| H | 0.88130400  | -2.82751500 | 0.29421500  |
| F | 1.93241300  | -1.89010400 | -2.02785500 |
| C | -2.01353700 | -0.27675100 | -0.15768400 |

|   |             |             |             |
|---|-------------|-------------|-------------|
| H | -1.98055000 | -0.47877700 | -1.23456900 |
| H | -3.02793400 | 0.09364500  | 0.04882200  |
| C | -1.05905900 | 0.88175000  | 0.17656900  |
| H | -1.30581900 | 1.72895700  | -0.48513300 |
| H | -1.29683200 | 1.23156800  | 1.19322300  |
| F | -0.12222200 | -1.15558800 | -2.38320800 |
| H | 2.22336800  | -0.14869600 | -0.36762400 |
| N | 1.34951500  | 1.64121900  | 0.85914900  |
| C | 1.05403000  | 1.54209200  | 2.33942300  |
| H | 0.01045000  | 1.77994400  | 2.57776700  |
| H | 1.73180900  | 2.24744700  | 2.82722100  |
| H | 1.30636200  | 0.52169500  | 2.63746200  |
| C | 1.02427100  | 3.02887300  | 0.35706800  |
| H | 1.69367600  | 3.70959800  | 0.88977300  |
| H | -0.02526800 | 3.29350500  | 0.53333400  |
| H | 1.26085100  | 3.03587800  | -0.70981500 |
| O | 2.66109300  | 1.40736700  | 0.67752500  |

### N-COT (*anti*-P)

$$E = -3807.52$$

$$H = -3635.52$$

$$G = -3668.13$$

$$N_{\text{imag}} = 0$$

|   |             |             |             |
|---|-------------|-------------|-------------|
| N | 1.93486470  | 1.44967999  | 0.03933676  |
| C | 2.85106639  | 1.61810896  | -1.15075650 |
| O | 1.00539160  | 2.42548265  | 0.00581950  |
| C | 2.72260056  | 1.59064346  | 1.32398868  |
| H | 3.64091673  | 0.85758619  | -1.18257670 |
| H | 3.28014298  | 2.62065881  | -1.06876938 |
| H | 2.21208193  | 1.56162494  | -2.03504225 |
| H | -0.41479718 | 1.01871610  | 0.01920771  |
| H | 1.99543277  | 1.50151826  | 2.13420963  |
| H | 3.14638092  | 2.59868929  | 1.31374041  |
| H | 3.51411098  | 0.83687351  | 1.41878899  |
| C | -0.99225239 | -1.13338396 | 0.00000000  |
| H | -1.54577673 | -1.08152763 | 0.95427341  |
| C | -0.00000000 | 0.00000000  | 0.00000000  |
| C | 1.32861260  | -0.00000000 | 0.00000000  |
| C | 2.31376190  | -1.14144381 | -0.04526897 |
| C | 2.40810762  | -1.89868709 | -1.39769354 |
| C | 1.49270861  | -3.11901738 | -1.54641463 |
| C | -0.02315165 | -2.87938169 | -1.50278073 |
| N | -0.57993581 | -2.51490001 | -0.19538579 |
| H | -1.75364484 | -0.90141910 | -0.76514129 |
| H | 2.08108699  | -1.85980249 | 0.75593835  |
| H | 3.31459182  | -0.76555416 | 0.20228421  |

|   |             |             |             |
|---|-------------|-------------|-------------|
| H | 3.44464884  | -2.24683518 | -1.52412115 |
| H | 2.21704797  | -1.19287358 | -2.22016514 |
| H | 1.74879486  | -3.86007291 | -0.76825926 |
| H | 1.72638171  | -3.60731453 | -2.50639526 |
| H | -0.51417587 | -3.80395696 | -1.85350612 |
| H | -0.29693227 | -2.09354978 | -2.22402757 |
| H | -0.00248997 | -2.85575376 | 0.56993874  |

**O-COT (*anti*-P)**

$E = -3687.26$

$H = -3523.05$

$G = -3555.13$

$N_{\text{imag}} = 0$

|   |             |             |             |
|---|-------------|-------------|-------------|
| N | 1.93120069  | 1.44541005  | 0.04435916  |
| C | 2.87570072  | 1.61146163  | -1.12315655 |
| O | 0.99981486  | 2.41978106  | -0.01223044 |
| C | 2.69087569  | 1.59101898  | 1.34611842  |
| H | 3.66681128  | 0.85174295  | -1.12988723 |
| H | 3.30005218  | 2.61533792  | -1.03392838 |
| H | 2.26011564  | 1.55065647  | -2.02364791 |
| H | -0.43096322 | 1.01118583  | 0.01323635  |
| H | 1.94766380  | 1.49928443  | 2.14127231  |
| H | 3.11001779  | 2.60093626  | 1.34252526  |
| H | 3.48284456  | 0.84018166  | 1.45704020  |
| C | -0.94413408 | -1.16062147 | -0.00000000 |
| H | -1.43198813 | -1.22491067 | 0.98675956  |
| C | 0.00000000  | -0.00000000 | -0.00000000 |
| C | 1.32942680  | -0.00000000 | -0.00000000 |
| C | 2.30343798  | -1.15207882 | -0.03332189 |
| C | 2.46640162  | -1.85626712 | -1.40974049 |
| C | 1.50415958  | -3.02146319 | -1.66982302 |
| C | 0.01959604  | -2.68437553 | -1.59012513 |
| O | -0.37507683 | -2.44532539 | -0.22812681 |
| H | -1.75487115 | -0.96161152 | -0.72888884 |
| H | 1.99323994  | -1.89739904 | 0.71195951  |
| H | 3.29255136  | -0.80146053 | 0.28835152  |
| H | 3.49267904  | -2.24751619 | -1.47816266 |
| H | 2.36653271  | -1.11158781 | -2.21387140 |
| H | 1.70416037  | -3.83535798 | -0.95484711 |
| H | 1.70715895  | -3.43129190 | -2.67240303 |
| H | -0.57608783 | -3.53251913 | -1.96676422 |
| H | -0.21411948 | -1.80653964 | -2.21536012 |

**S-COT (*anti*-P)**

$E = -3626.09$

$H = -3463.71$

$G = -3497.08$

$N_{\text{imag}} = 0$

|   |             |             |             |
|---|-------------|-------------|-------------|
| N | 1.92226608  | 1.45250168  | 0.01909414  |
| C | 2.85942309  | 1.60534175  | -1.15585675 |
| O | 0.98560660  | 2.42158084  | -0.04872375 |
| C | 2.68674713  | 1.62026875  | 1.31461372  |
| H | 3.65443085  | 0.84984425  | -1.15534277 |
| H | 3.27913024  | 2.61251427  | -1.08434794 |
| H | 2.23995788  | 1.52742128  | -2.05235473 |
| H | -0.40773263 | 1.02370486  | -0.01068070 |
| H | 1.94746981  | 1.53833231  | 2.11445162  |
| H | 3.10409214  | 2.63080778  | 1.29431732  |
| H | 3.48060823  | 0.87259873  | 1.43286146  |
| C | -1.00515304 | -1.10543170 | -0.00000000 |
| H | -1.67565474 | -0.96853899 | 0.86370541  |
| C | 0.00000000  | -0.00000000 | -0.00000000 |
| C | 1.32877070  | -0.00000000 | -0.00000000 |
| C | 2.31131467  | -1.13909886 | -0.04516869 |
| C | 2.46047456  | -1.82678950 | -1.43673723 |
| C | 1.76332870  | -3.18509053 | -1.57347339 |
| C | 0.23326113  | -3.19175748 | -1.51307858 |
| S | -0.51306527 | -2.86243555 | 0.13504585  |
| H | -1.65508202 | -1.00248615 | -0.88483436 |
| H | 2.00438684  | -1.89130288 | 0.69341306  |
| H | 3.29925282  | -0.78859317 | 0.27895020  |
| H | 3.52998506  | -1.98482249 | -1.64011029 |
| H | 2.09645293  | -1.14862065 | -2.22292472 |
| H | 2.15080233  | -3.87403197 | -0.80625236 |
| H | 2.05166536  | -3.61758552 | -2.54643267 |
| H | -0.13521648 | -4.18782259 | -1.79271570 |
| H | -0.20252574 | -2.47571508 | -2.22504154 |

### Propyne (syn-RC)

$E = -2214.24$

$H = -2114.46$

$G = -2144.09$

$N_{\text{imag}} = 0$

|   |             |             |             |
|---|-------------|-------------|-------------|
| C | 1.21055967  | 0.00000000  | 0.00000000  |
| C | 0.00000000  | 0.00000000  | 0.00000000  |
| H | 2.27977020  | -0.01835717 | 0.00019798  |
| N | -0.92911529 | 3.52745873  | 0.01860353  |
| C | -1.21766634 | 4.31319307  | -1.18065988 |
| H | -2.29093297 | 4.54704961  | -1.19124170 |
| H | -0.64192312 | 5.25755155  | -1.21272909 |
| C | -1.18885554 | 4.30391330  | 1.23050932  |
| H | -2.26167026 | 4.53701701  | 1.26889842  |

|   |             |             |             |
|---|-------------|-------------|-------------|
| H | -0.61286344 | 5.24831229  | 1.25579828  |
| O | 0.51702834  | 3.29465699  | 0.00000000  |
| H | 0.57628166  | 2.31575574  | -0.00024207 |
| H | -0.92598443 | 3.70266650  | 2.10773525  |
| H | -0.97642776 | 3.71859809  | -2.06857679 |
| C | -1.45412202 | 0.02252434  | -0.00046923 |
| H | -1.85414355 | -0.49139797 | 0.88459948  |
| H | -1.85329392 | -0.47642922 | -0.89444040 |
| H | -1.81031271 | 1.06408942  | 0.00813575  |

### HO-COT (*syn*-RC)

$E = -4060.78$

$H = -3879.51$

$G = -3916.28$

$N_{\text{imag}} = 0$

|   |             |             |             |
|---|-------------|-------------|-------------|
| C | 3.19089800  | -0.73754700 | -0.19337400 |
| C | 0.06479300  | -1.03747200 | -0.26558600 |
| C | 2.71949000  | 0.61060800  | 0.40014200  |
| C | 0.45058500  | 0.11451000  | -0.24853900 |
| C | 1.42935200  | 1.20956400  | -0.21641200 |
| H | 2.23335500  | -1.84012600 | 1.44174000  |
| H | 3.00254600  | -0.74650100 | -1.27926600 |
| H | 2.54041000  | 0.51014600  | 1.48086200  |
| H | 3.50456600  | -2.71676200 | 0.61418500  |
| H | 4.28522100  | -0.76013300 | -0.08968600 |
| H | 3.50695500  | 1.36923300  | 0.27877900  |
| H | 1.64708700  | 1.50349900  | -1.26413600 |
| C | 1.61280100  | -2.88734000 | -0.36346700 |
| H | 1.70810900  | -3.94973700 | -0.09213500 |
| H | 1.85023200  | -2.81488000 | -1.43549700 |
| C | 0.12100000  | -2.48656800 | -0.16252000 |
| H | -0.22517600 | -2.80689900 | 0.83329800  |
| O | 1.04632400  | 2.34753700  | 0.54456500  |
| H | -0.51408700 | -2.99714400 | -0.90110900 |
| H | 0.06935800  | 2.50430800  | 0.39130100  |
| H | -1.64264300 | 0.79335700  | -0.09477200 |
| N | -1.74058200 | 2.69714900  | 0.23393300  |
| C | -2.13377500 | 3.58670000  | -0.86256600 |
| H | -3.23033500 | 3.69708400  | -0.92659700 |
| H | -1.67749600 | 4.57031200  | -0.69066000 |
| H | -1.75717500 | 3.17970300  | -1.80668800 |
| C | -2.25705300 | 3.17103800  | 1.52161900  |
| H | -1.80838000 | 4.14995300  | 1.73526100  |
| H | -3.35677200 | 3.26559100  | 1.51037200  |
| H | -1.96050100 | 2.46655800  | 2.30527100  |
| O | -2.39863800 | 1.42178700  | -0.02173900 |



C 2.64216100 -2.05650000 0.44205000

**DIFO (syn-RC)**

$E = -3924.69$

$H = -3756.47$

$G = -3794.70$

$N_{\text{imag}} = 0$

|   |             |             |             |
|---|-------------|-------------|-------------|
| C | -1.77502800 | -1.59030900 | 0.62506100  |
| C | -1.23269200 | -2.74916800 | -0.22763400 |
| C | 0.41450700  | 0.61356700  | 0.08940000  |
| C | 0.25492900  | -2.72240300 | -0.60361100 |
| C | 1.14452000  | -0.30458600 | -0.53073100 |
| C | 0.77078600  | -1.49479300 | -1.36004000 |
| H | -2.73039500 | -1.92082400 | 1.05664700  |
| H | -1.39651600 | -3.69298700 | 0.31376300  |
| H | 0.47296100  | -3.58584500 | -1.24822700 |
| H | -1.10573800 | -1.41008900 | 1.48190000  |
| H | -1.83249900 | -2.81923200 | -1.14749200 |
| H | 0.88130400  | -2.82751500 | 0.29421500  |
| F | 1.93241300  | -1.89010400 | -2.02785500 |
| C | -2.01353700 | -0.27675100 | -0.15768400 |
| H | -1.98055000 | -0.47877700 | -1.23456900 |
| H | -3.02793400 | 0.09364500  | 0.04882200  |
| C | -1.05905900 | 0.88175000  | 0.17656900  |
| H | -1.30581900 | 1.72895700  | -0.48513300 |
| H | -1.29683200 | 1.23156800  | 1.19322300  |
| F | -0.12222200 | -1.15558800 | -2.38320800 |
| H | 2.22336800  | -0.14869600 | -0.36762400 |
| N | 1.34951500  | 1.64121900  | 0.85914900  |
| C | 1.05403000  | 1.54209200  | 2.33942300  |
| H | 0.01045000  | 1.77994400  | 2.57776700  |
| H | 1.73180900  | 2.24744700  | 2.82722100  |
| H | 1.30636200  | 0.52169500  | 2.63746200  |
| C | 1.02427100  | 3.02887300  | 0.35706800  |
| H | 1.69367600  | 3.70959800  | 0.88977300  |
| H | -0.02526800 | 3.29350500  | 0.53333400  |
| H | 1.26085100  | 3.03587800  | -0.70981500 |
| O | 2.66109300  | 1.40736700  | 0.67752500  |

**N-COT (syn-RC)**

$E = -3796.09$

$H = -3624.62$

$G = -3661.74$

$N_{\text{imag}} = 0$

|   |            |             |            |
|---|------------|-------------|------------|
| N | 0.57340000 | -0.46990000 | 2.16490000 |
| C | 1.91440000 | -0.07350000 | 2.59440000 |

|   |             |             |             |
|---|-------------|-------------|-------------|
| O | -0.25170000 | 0.72870000  | 2.30940000  |
| C | 0.00730000  | -1.46600000 | 3.07800000  |
| H | 2.56800000  | -0.95450000 | 2.54650000  |
| H | 1.92030000  | 0.32620000  | 3.62540000  |
| H | 2.30180000  | 0.69290000  | 1.91400000  |
| H | -0.69430000 | 0.80410000  | 1.43310000  |
| H | -1.01460000 | -1.70490000 | 2.76430000  |
| H | -0.01290000 | -1.10820000 | 4.12380000  |
| H | 0.61760000  | -2.37720000 | 3.01820000  |
| C | -1.39280000 | -0.96120000 | -0.84260000 |
| H | -1.75960000 | -1.61160000 | -0.03700000 |
| C | -1.69340000 | 0.46280000  | -0.61260000 |
| C | -1.42630000 | 1.64950000  | -0.65280000 |
| C | -0.63480000 | 2.83360000  | -0.95270000 |
| C | 0.47180000  | 2.38430000  | -1.94840000 |
| C | 1.27460000  | 1.12940000  | -1.52630000 |
| C | 0.76140000  | -0.29680000 | -1.93700000 |
| N | 0.05770000  | -1.15360000 | -0.96600000 |
| H | -1.88960000 | -1.29630000 | -1.76740000 |
| H | -0.17980000 | 3.23530000  | -0.03310000 |
| H | -1.23390000 | 3.64660000  | -1.38920000 |
| H | 1.16350000  | 3.22970000  | -2.09000000 |
| H | 0.00080000  | 2.19970000  | -2.92630000 |
| H | 1.44640000  | 1.14680000  | -0.43830000 |
| H | 2.27190000  | 1.23000000  | -1.98140000 |
| H | 1.65150000  | -0.86910000 | -2.24000000 |
| H | 0.13160000  | -0.21710000 | -2.83700000 |
| H | 0.46960000  | -1.04260000 | -0.02920000 |

**O-COT (syn-RC)**

$E = -3670.50$

$H = -3508.27$

$G = -3543.09$

$N_{\text{imag}} = 0$

|   |             |             |             |
|---|-------------|-------------|-------------|
| N | -0.12500000 | -0.71680000 | 3.02900000  |
| C | 1.17910000  | -0.87710000 | 3.67010000  |
| O | -0.34350000 | 0.72740000  | 2.92760000  |
| C | -1.19770000 | -1.21970000 | 3.88530000  |
| H | 1.36990000  | -1.95080000 | 3.80210000  |
| H | 1.22740000  | -0.37760000 | 4.65670000  |
| H | 1.95480000  | -0.45890000 | 3.01950000  |
| H | -0.44280000 | 0.85780000  | 1.95970000  |
| H | -2.16180000 | -1.04930000 | 3.39370000  |
| H | -1.20870000 | -0.73030000 | 4.87820000  |
| H | -1.05480000 | -2.30050000 | 4.02020000  |
| C | -0.23850000 | -0.85000000 | -0.59590000 |

|   |             |             |             |
|---|-------------|-------------|-------------|
| H | 0.01360000  | -1.43810000 | 0.29570000  |
| C | -0.57560000 | 0.53670000  | -0.27160000 |
| C | -0.48290000 | 1.73550000  | -0.44440000 |
| C | -0.03370000 | 2.98720000  | -1.02860000 |
| C | 0.54350000  | 2.62500000  | -2.42970000 |
| C | 1.49380000  | 1.40460000  | -2.46910000 |
| C | 0.87380000  | -0.01940000 | -2.59970000 |
| O | 0.93490000  | -0.85740000 | -1.42830000 |
| H | -1.08450000 | -1.34220000 | -1.11200000 |
| H | 0.74680000  | 3.44280000  | -0.39880000 |
| H | -0.83810000 | 3.73020000  | -1.12940000 |
| H | 1.07240000  | 3.51040000  | -2.81400000 |
| H | -0.30020000 | 2.44440000  | -3.11330000 |
| H | 2.16240000  | 1.40490000  | -1.59540000 |
| H | 2.14630000  | 1.54090000  | -3.34480000 |
| H | 1.45710000  | -0.58030000 | -3.34260000 |
| H | -0.16410000 | 0.04230000  | -2.97010000 |

### S-COT (syn-RC)

$E = -3615.65$

$H = -3455.07$

$G = -3490.72$

$N_{\text{imag}} = 0$

|   |             |             |             |
|---|-------------|-------------|-------------|
| N | -0.10910000 | -1.53290000 | 3.01110000  |
| C | 1.27250000  | -1.70540000 | 3.45940000  |
| O | -0.30920000 | -0.08790000 | 2.88060000  |
| C | -1.05400000 | -1.96860000 | 4.03820000  |
| H | 1.45600000  | -2.77810000 | 3.60900000  |
| H | 1.47720000  | -1.16810000 | 4.40490000  |
| H | 1.95210000  | -1.33700000 | 2.68340000  |
| H | -0.51740000 | 0.01340000  | 1.92690000  |
| H | -2.07640000 | -1.79120000 | 3.68690000  |
| H | -0.90620000 | -1.43760000 | 4.99780000  |
| H | -0.91610000 | -3.04630000 | 4.20020000  |
| C | -0.81150000 | -1.85090000 | -0.41610000 |
| H | -0.52720000 | -2.34160000 | 0.52620000  |
| C | -0.92960000 | -0.41730000 | -0.27390000 |
| C | -0.81760000 | 0.77630000  | -0.46600000 |
| C | -0.37390000 | 2.03810000  | -1.03920000 |
| C | 0.16520000  | 1.75350000  | -2.47090000 |
| C | 1.09270000  | 0.52050000  | -2.58410000 |
| C | 0.39500000  | -0.84710000 | -2.84760000 |
| S | 0.58640000  | -2.18960000 | -1.60290000 |
| H | -1.73790000 | -2.30720000 | -0.79200000 |
| H | 0.42700000  | 2.46570000  | -0.41500000 |
| H | -1.17630000 | 2.78960000  | -1.07860000 |

|   |             |             |             |
|---|-------------|-------------|-------------|
| H | 0.70200000  | 2.65120000  | -2.81240000 |
| H | -0.69120000 | 1.62660000  | -3.15040000 |
| H | 1.72170000  | 0.44100000  | -1.68620000 |
| H | 1.78270000  | 0.70180000  | -3.42120000 |
| H | 0.82340000  | -1.31350000 | -3.74510000 |
| H | -0.67730000 | -0.71920000 | -3.04600000 |

**Propyne (syn-TS)**

$E = -2199.70$

$H = -2102.13$

$G = -2128.92$

$N_{\text{imag}} = 1, \nu = -550.07084$

|   |             |             |             |
|---|-------------|-------------|-------------|
| C | 1.25556409  | 0.00000000  | 0.00000000  |
| C | 0.00000000  | 0.00000000  | 0.00000000  |
| H | 2.08858173  | -0.68863387 | -0.00018361 |
| N | -0.28754016 | 2.14354815  | 0.00058595  |
| C | -0.95053424 | 2.58412256  | -1.23052427 |
| H | -1.98471133 | 2.21567215  | -1.24335833 |
| H | -0.95807100 | 3.68366543  | -1.30161051 |
| C | -0.94912435 | 2.58330542  | 1.23276238  |
| H | -1.98338849 | 2.21513484  | 1.24643742  |
| H | -0.95627242 | 3.68279050  | 1.30475629  |
| O | 1.03251398  | 2.50085878  | 0.00000000  |
| H | 1.47604634  | 1.43889023  | -0.00007668 |
| H | -0.39841192 | 2.16989827  | 2.08315480  |
| H | -0.40064292 | 2.17156948  | -2.08185426 |
| C | -1.35937028 | -0.54746520 | -0.00008565 |
| H | -1.31562384 | -1.64739495 | -0.00040710 |
| H | -1.92910593 | -0.23766800 | -0.88811314 |
| H | -1.92899753 | -0.23818144 | 0.88819709  |

**HO-COT (syn-TS)**

$E = -4045.10$

$H = -3866.92$

$G = -3900.89$

$N_{\text{imag}} = 1, \nu = -558.2332 \text{ i cm}^{-1}$

|   |             |             |             |
|---|-------------|-------------|-------------|
| C | 3.13119300  | -0.57904300 | 0.15977400  |
| C | -0.39279400 | -0.47192800 | -0.20497700 |
| C | 2.56482900  | 0.79926700  | 0.54137900  |
| C | 0.20309800  | 0.63567900  | -0.23122500 |
| C | 1.47566400  | 1.38243900  | -0.37687000 |
| H | 1.82301200  | -1.73987700 | 1.45732300  |
| H | 3.39833000  | -0.58004100 | -0.91097600 |
| H | 2.18134200  | 0.78324900  | 1.57272300  |
| H | 3.04853400  | -2.66468900 | 0.60993200  |
| H | 4.08747400  | -0.66792500 | 0.69744600  |

|   |             |             |             |
|---|-------------|-------------|-------------|
| H | 3.38893500  | 1.52833400  | 0.51733800  |
| H | 1.81394000  | 1.26664700  | -1.42520100 |
| C | 1.28321800  | -2.33425900 | -0.56905700 |
| H | 1.32230600  | -3.43306600 | -0.63351200 |
| H | 1.56703000  | -1.96007900 | -1.56554200 |
| C | -0.17553700 | -1.93845500 | -0.28327400 |
| H | -0.50347100 | -2.39762100 | 0.66546900  |
| O | 1.41142400  | 2.79375200  | -0.07413800 |
| H | -0.83517800 | -2.37095800 | -1.05307800 |
| H | 0.82581500  | 3.19791500  | -0.73565700 |
| H | -1.70530400 | 0.01675300  | 0.02827400  |
| N | -1.55027100 | 1.91795200  | 0.16619300  |
| C | -1.87351400 | 2.82117000  | -0.94394600 |
| H | -2.88033100 | 3.25004700  | -0.81474000 |
| H | -1.14768400 | 3.64551100  | -0.97899100 |
| H | -1.84049000 | 2.25259500  | -1.87821300 |
| C | -1.42401800 | 2.57920700  | 1.47258500  |
| H | -0.60199600 | 3.30222300  | 1.43337600  |
| H | -2.36763000 | 3.07889200  | 1.74583200  |
| H | -1.19427200 | 1.81072600  | 2.21598800  |
| O | -2.44980200 | 0.89879800  | 0.21834000  |
| C | 2.31586000  | -1.85486800 | 0.47789800  |

**DIFO (syn-TS)**

$E = -3921.45$

$H = -3754.26$

$G = -3790.47$

$N_{\text{imag}} = 1, \nu = -343.0553 \text{ i cm}^{-1}$

|   |             |             |             |
|---|-------------|-------------|-------------|
| C | -2.54974600 | -1.15838200 | 0.27869200  |
| C | -2.99427900 | 0.21808700  | 0.82597300  |
| C | 0.41252800  | -0.03924600 | 0.25431800  |
| C | -2.49156400 | 1.48578100  | 0.10845600  |
| C | 0.02435000  | 1.15380000  | 0.35341600  |
| C | -1.13472900 | 2.05002100  | 0.56805900  |
| H | -3.36737700 | -1.86510400 | 0.48148600  |
| H | -4.09266300 | 0.23794400  | 0.76712300  |
| H | -3.23576300 | 2.28467000  | 0.25415900  |
| H | -2.46358900 | -1.11725400 | -0.81769900 |
| H | -2.75750700 | 0.28204700  | 1.90159300  |
| H | -2.45252000 | 1.29937900  | -0.97629200 |
| H | -0.96345700 | 3.01753400  | 0.07081600  |
| C | -1.28340600 | -1.80361000 | 0.86913600  |
| H | -1.18795900 | -1.56409300 | 1.93789100  |
| H | -1.35683700 | -2.89810100 | 0.78848300  |
| C | 0.04823100  | -1.45735800 | 0.20818000  |
| F | 1.02752700  | -2.25877300 | 0.81640000  |

|   |             |             |             |
|---|-------------|-------------|-------------|
| F | 0.01850200  | -1.90213000 | -1.12442700 |
| H | -1.18095000 | 2.28507400  | 1.64621200  |
| H | 1.37708700  | 1.73319500  | 0.10144300  |
| N | 2.47027400  | 0.20539800  | -0.11904900 |
| C | 2.82793200  | -0.33101100 | -1.44016600 |
| H | 2.71503500  | -1.42074400 | -1.42635500 |
| H | 3.86544800  | -0.06278400 | -1.69287100 |
| H | 2.14738600  | 0.09814700  | -2.18018100 |
| C | 3.30969500  | -0.29692300 | 0.97990900  |
| H | 4.34714300  | 0.04457200  | 0.84433900  |
| H | 3.26980500  | -1.39015900 | 0.99541400  |
| H | 2.91632700  | 0.09931200  | 1.92054000  |
| O | 2.47085400  | 1.57221900  | -0.12571700 |

**N-COT (*syn*-TS)**

$E = -3788.45$

$H = -3619.78$

$G = -3653.80$

$N_{\text{imag}} = 1, \nu = -452.9115 \text{ i cm}^{-1}$

|   |             |             |             |
|---|-------------|-------------|-------------|
| N | -0.36282889 | 2.12716802  | -0.00205705 |
| C | -1.03803693 | 2.56098774  | 1.22381524  |
| O | 0.95014925  | 2.51467470  | -0.00000000 |
| C | -1.03153126 | 2.54125365  | -1.23901329 |
| H | -2.06452458 | 2.17149568  | 1.23506776  |
| H | -1.06818697 | 3.66079642  | 1.28943501  |
| H | -0.48366171 | 2.16381633  | 2.07948083  |
| H | 1.41355497  | 1.46569129  | 0.00856013  |
| H | -0.46746715 | 2.13631675  | -2.08449365 |
| H | -1.06867776 | 3.64007727  | -1.31928450 |
| H | -2.05398014 | 2.14134223  | -1.25242886 |
| C | -1.30857111 | -0.68508699 | 0.01054298  |
| H | -2.01228718 | -0.19145838 | 0.69841849  |
| C | -0.00000000 | -0.00000000 | -0.00000000 |
| C | 1.25775073  | 0.00000000  | -0.00000000 |
| C | 2.41791651  | -0.92572031 | -0.05563571 |
| C | 2.12133672  | -2.25450491 | -0.77619153 |
| C | 1.08449847  | -3.18838847 | -0.12067598 |
| C | -0.42476433 | -2.99818403 | -0.42784869 |
| N | -1.23095268 | -2.09488245 | 0.40553718  |
| H | -1.77519729 | -0.63721714 | -0.98810930 |
| H | 2.75518168  | -1.13356868 | 0.97528894  |
| H | 3.27525596  | -0.43928729 | -0.54692047 |
| H | 3.07306054  | -2.80436178 | -0.85629478 |
| H | 1.80884978  | -2.03451718 | -1.80995959 |
| H | 1.22579074  | -3.19472168 | 0.97432989  |
| H | 1.32516918  | -4.21232384 | -0.44883849 |

|   |             |             |             |
|---|-------------|-------------|-------------|
| H | -0.89156550 | -3.99273967 | -0.34032557 |
| H | -0.55637456 | -2.69094787 | -1.47730368 |
| H | -0.92990555 | -2.15958300 | 1.37950827  |

**O-COT (syn-TS)**

$E = -3664.95$

$H = -3504.05$

$G = -3537.80$

$N_{\text{imag}} = 1, \nu = -387.2463 \text{ i cm}^{-1}$

|   |             |             |             |
|---|-------------|-------------|-------------|
| N | -0.40128574 | 2.10846369  | -0.00019814 |
| C | -1.07778205 | 2.52297806  | 1.23273523  |
| O | 0.90561651  | 2.51505164  | 0.00000000  |
| C | -1.07831702 | 2.52311746  | -1.23306065 |
| H | -2.10078365 | 2.12475977  | 1.24018165  |
| H | -1.11561653 | 3.62135269  | 1.30982830  |
| H | -0.51949219 | 2.11897379  | 2.08258244  |
| H | 1.38755674  | 1.48760589  | 0.00713332  |
| H | -0.51412803 | 2.12719345  | -2.08269568 |
| H | -1.12450903 | 3.62164573  | -1.30650343 |
| H | -2.09728046 | 2.11459331  | -1.24407967 |
| C | -1.29450372 | -0.69559507 | 0.01665496  |
| H | -1.96381130 | -0.29966519 | 0.79444088  |
| C | 0.00000000  | 0.00000000  | 0.00000000  |
| C | 1.25506389  | 0.00000000  | 0.00000000  |
| C | 2.42161664  | -0.91791643 | -0.03104213 |
| C | 2.16168045  | -2.21949056 | -0.81416372 |
| C | 1.06292942  | -3.15403952 | -0.27411974 |
| C | -0.40915633 | -2.86148708 | -0.62657041 |
| O | -1.13810206 | -2.08117014 | 0.33730673  |
| H | -1.81504408 | -0.58627126 | -0.95644027 |
| H | 2.69813056  | -1.16345996 | 1.00902908  |
| H | 3.30356386  | -0.41655083 | -0.45871881 |
| H | 3.10785743  | -2.78377448 | -0.83839773 |
| H | 1.93377581  | -1.96250775 | -1.86151715 |
| H | 1.13757582  | -3.24894597 | 0.82079139  |
| H | 1.27127541  | -4.15860402 | -0.67665035 |
| H | -0.95000759 | -3.81876007 | -0.66262294 |
| H | -0.48603161 | -2.39757120 | -1.62620550 |

**S-COT (syn-TS)**

$E = -3606.70$

$H = -3447.82$

$G = -3482.88$

$N_{\text{imag}} = 1, \nu = -593.6325 \text{ i cm}^{-1}$

|   |             |            |             |
|---|-------------|------------|-------------|
| N | -0.33079414 | 2.14493017 | -0.00664950 |
| C | -1.00597342 | 2.57049940 | 1.22296871  |

|   |             |             |             |
|---|-------------|-------------|-------------|
| O | 0.98363800  | 2.50549420  | 0.00000000  |
| C | -0.99425856 | 2.57187918  | -1.24240221 |
| H | -2.03519000 | 2.18814278  | 1.22889659  |
| H | -1.02924752 | 3.66965047  | 1.29828989  |
| H | -0.45522732 | 2.16128431  | 2.07523243  |
| H | 1.42986304  | 1.42321406  | 0.00567862  |
| H | -0.43229874 | 2.16740036  | -2.08955342 |
| H | -1.02006647 | 3.67125365  | -1.31563631 |
| H | -2.02115783 | 2.18364944  | -1.26025849 |
| C | -1.32052812 | -0.61439549 | -0.01719122 |
| H | -1.98023792 | -0.22562088 | 0.77274864  |
| C | 0.00000000  | 0.00000000  | 0.00000000  |
| C | 1.25786874  | -0.00000000 | 0.00000000  |
| C | 2.44768709  | -0.89323233 | -0.02143577 |
| C | 2.34205881  | -2.09173362 | -0.98663594 |
| C | 1.36840181  | -3.22631009 | -0.62052482 |
| C | -0.12591492 | -3.05430114 | -0.96191875 |
| S | -1.24365042 | -2.42154302 | 0.34989689  |
| H | -1.83653554 | -0.46681716 | -0.97866030 |
| H | 2.62224410  | -1.26499904 | 1.00288298  |
| H | 3.34877400  | -0.31927983 | -0.28579521 |
| H | 3.34874493  | -2.53380815 | -1.05629174 |
| H | 2.10559656  | -1.71798523 | -1.99607134 |
| H | 1.46656164  | -3.47838500 | 0.44661405  |
| H | 1.70508298  | -4.11916019 | -1.17244233 |
| H | -0.55429368 | -4.04108727 | -1.18473554 |
| H | -0.26869019 | -2.43883272 | -1.86177734 |

### Propyne (*syn-P*)

$E = -2222.41$

$H = -2121.03$

$G = -2147.22$

$N_{\text{imag}} = 0$

|   |             |             |             |
|---|-------------|-------------|-------------|
| C | 1.32710387  | 0.00000000  | 0.00000000  |
| C | 0.00000000  | 0.00000000  | 0.00000000  |
| H | 1.88118102  | -0.93641386 | -0.00020857 |
| N | -0.65412775 | 1.39850780  | 0.00051526  |
| C | -1.52237666 | 1.51877769  | -1.23479058 |
| H | -2.31605373 | 0.76121361  | -1.25867306 |
| H | -1.94417240 | 2.52676651  | -1.20674030 |
| C | -1.52047508 | 1.51849203  | 1.23721933  |
| H | -2.31397195 | 0.76077699  | 1.26234869  |
| H | -1.94251570 | 2.52639779  | 1.20995065  |
| O | 0.24459126  | 2.40391673  | 0.00000000  |
| H | 1.83781836  | 0.96258278  | 0.00015198  |
| H | -0.84942807 | 1.42006486  | 2.09400433  |



|   |             |             |             |
|---|-------------|-------------|-------------|
| H | -0.85272704 | 1.42028836  | -2.09267385 |
| C | -0.89306818 | -1.20441846 | -0.00023786 |
| H | -1.54289984 | -1.24847022 | -0.88597667 |
| H | -1.54354512 | -1.24837972 | 0.88504223  |
| H | -0.27367462 | -2.10926764 | 0.00007176  |

**HO-COT (syn-P)**

$E = -4062.89$

$H = -3880.40$

$G = -3914.41$

$N_{\text{imag}} = 0$

|   |             |             |             |
|---|-------------|-------------|-------------|
| C | 3.02141000  | -0.38183000 | 0.55216500  |
| C | -0.66589400 | -0.56690700 | -0.24885300 |
| C | 2.17035100  | 0.88654700  | 0.69604800  |
| C | -0.22054000 | 0.68472600  | -0.20493100 |
| C | 1.19322000  | 1.16138700  | -0.48254600 |
| H | 1.61613900  | -1.81007300 | 1.38795100  |
| H | 3.64097300  | -0.29594600 | -0.35752200 |
| H | 1.61301700  | 0.86033700  | 1.64280200  |
| H | 3.04150200  | -2.51543000 | 0.64336500  |
| H | 3.72834900  | -0.39994700 | 1.39598900  |
| H | 2.85424800  | 1.74827700  | 0.76606200  |
| H | 1.54721000  | 0.59501300  | -1.35862300 |
| C | 1.48136100  | -2.02699100 | -0.77647500 |
| H | 1.66271600  | -3.07092100 | -1.07270300 |
| H | 1.87102000  | -1.42322600 | -1.60976800 |
| C | -0.04158300 | -1.87108600 | -0.65182900 |
| H | -0.39875000 | -2.62321700 | 0.07290800  |
| O | 1.20087000  | 2.56409800  | -0.84590800 |
| H | -0.50949600 | -2.17525700 | -1.60545400 |
| H | 2.12184300  | 2.79376300  | -1.05452100 |
| H | -1.71250400 | -0.61197300 | 0.09307600  |
| N | -1.34288300 | 1.69056800  | 0.29844200  |
| C | -1.72441200 | 2.58701400  | -0.86063600 |
| H | -2.50427200 | 3.25272500  | -0.47889800 |
| H | -0.86031100 | 3.13853400  | -1.23997200 |
| H | -2.14554800 | 1.92742600  | -1.62297300 |
| C | -0.79208700 | 2.51345800  | 1.43603200  |
| H | 0.10870400  | 3.05689300  | 1.13198400  |
| H | -1.59282100 | 3.19835900  | 1.73004900  |
| H | -0.59535800 | 1.81559300  | 2.25357000  |
| O | -2.45517300 | 1.05920800  | 0.72251900  |
| C | 2.28282300  | -1.72985900 | 0.51406600  |

**DIFO (syn-P)**

$E = -3937.53$

$H = -3767.11$

$G = -3801.63$

$N_{\text{imag}} = 0$

|   |             |             |             |
|---|-------------|-------------|-------------|
| C | -2.10189100 | -1.13811900 | -0.05089900 |
| C | -3.01792400 | 0.08483700  | 0.11833400  |
| C | 0.75034500  | 0.07147300  | 0.48218100  |
| C | -2.34648900 | 1.46534000  | 0.10085900  |
| C | 0.14784600  | 1.25327200  | 0.58404000  |
| C | -1.19322800 | 1.66665800  | 1.11976200  |
| H | -2.73551800 | -2.01117500 | -0.25707300 |
| H | -3.77466000 | 0.06865700  | -0.68090600 |
| H | -3.12135600 | 2.21947800  | 0.30264700  |
| H | -1.46691700 | -1.01464500 | -0.94070400 |
| H | -3.57662600 | -0.02976900 | 1.06256300  |
| H | -1.96562000 | 1.68171000  | -0.90905600 |
| H | -1.12823900 | 2.73675000  | 1.35790500  |
| C | -1.22880700 | -1.45325100 | 1.18460600  |
| H | -1.54973000 | -0.86593000 | 2.05350500  |
| H | -1.32836900 | -2.50772700 | 1.47597600  |
| C | 0.26991400  | -1.25079500 | 1.01578100  |
| F | 0.86401600  | -1.48992400 | 2.26581800  |
| F | 0.73592000  | -2.30618900 | 0.21015200  |
| H | -1.43865500 | 1.16005100  | 2.06399200  |
| H | 0.80014500  | 2.03664200  | 0.16161400  |
| N | 2.17648900  | 0.18666400  | -0.20891600 |
| C | 2.11767100  | -0.48038500 | -1.56788100 |
| H | 1.86593900  | -1.54106300 | -1.49212800 |
| H | 3.10588600  | -0.33030200 | -2.01139600 |
| H | 1.37034000  | 0.06869800  | -2.14546500 |
| C | 3.20314500  | -0.49798800 | 0.66144900  |
| H | 4.16136800  | -0.36460200 | 0.15191400  |
| H | 2.96809300  | -1.55773500 | 0.80088200  |
| H | 3.21111300  | 0.03380000  | 1.61499800  |
| O | 2.54160100  | 1.46889600  | -0.39348200 |

**N-COT (syn-P)**

$E = -3807.38$

$H = -3635.26$

$G = -3667.69$

$N_{\text{imag}} = 0$

|   |             |             |            |
|---|-------------|-------------|------------|
| N | 0.37320000  | -0.03850000 | 2.22450000 |
| C | 1.54330000  | -0.99630000 | 2.20380000 |
| O | 0.68290000  | 1.00030000  | 3.02660000 |
| C | -0.84960000 | -0.72880000 | 2.78990000 |
| H | 1.35930000  | -1.87130000 | 1.56810000 |
| H | 1.71160000  | -1.29900000 | 3.24110000 |

|   |             |             |             |
|---|-------------|-------------|-------------|
| H | 2.39980000  | -0.41760000 | 1.84890000  |
| H | 0.34460000  | 2.22490000  | 1.49110000  |
| H | -1.63830000 | 0.02660000  | 2.81240000  |
| H | -0.58940000 | -1.02600000 | 3.80980000  |
| H | -1.15260000 | -1.59970000 | 2.19550000  |
| C | -0.19620000 | -0.75160000 | -0.22780000 |
| H | -0.38370000 | -1.68200000 | 0.32860000  |
| C | 0.04700000  | 0.37860000  | 0.74720000  |
| C | 0.07990000  | 1.69630000  | 0.56390000  |
| C | -0.18010000 | 2.54600000  | -0.64170000 |
| C | -0.41550000 | 1.91790000  | -2.02170000 |
| C | 0.78940000  | 1.15730000  | -2.61930000 |
| C | 0.75070000  | -0.38010000 | -2.51230000 |
| N | 0.87720000  | -1.01760000 | -1.20320000 |
| H | -1.12030000 | -0.56540000 | -0.79140000 |
| H | 0.66440000  | 3.25410000  | -0.72340000 |
| H | -1.04310000 | 3.18990000  | -0.39480000 |
| H | -0.67820000 | 2.74530000  | -2.69720000 |
| H | -1.30360000 | 1.26730000  | -2.00480000 |
| H | 1.72500000  | 1.53310000  | -2.17250000 |
| H | 0.85690000  | 1.38710000  | -3.69450000 |
| H | 1.56050000  | -0.78840000 | -3.13640000 |
| H | -0.19050000 | -0.74050000 | -2.96070000 |
| H | 1.78430000  | -0.79700000 | -0.79020000 |

**O-COT (*syn-P*)**

$E = -3685.83$

$H = -3521.53$

$G = -3553.64$

$N_{\text{imag}} = 0$

|   |             |             |             |
|---|-------------|-------------|-------------|
| N | -0.17080000 | -0.06030000 | 2.17990000  |
| C | 0.82560000  | -0.81610000 | 3.02990000  |
| O | -0.63660000 | 0.99210000  | 2.88170000  |
| C | -1.33950000 | -0.96200000 | 1.84450000  |
| H | 1.20430000  | -1.71120000 | 2.51840000  |
| H | 0.30240000  | -1.08470000 | 3.95180000  |
| H | 1.63420000  | -0.11550000 | 3.25180000  |
| H | -0.07640000 | 2.20130000  | 1.33310000  |
| H | -2.03030000 | -0.35800000 | 1.25170000  |
| H | -1.80310000 | -1.22430000 | 2.79930000  |
| H | -1.03000000 | -1.86350000 | 1.30030000  |
| C | 1.21710000  | -0.76090000 | 0.07360000  |
| H | 2.22060000  | -0.96920000 | 0.47720000  |
| C | 0.54580000  | 0.34330000  | 0.85760000  |
| C | 0.48910000  | 1.64230000  | 0.57660000  |
| C | 1.05370000  | 2.38680000  | -0.60470000 |

|   |             |             |             |
|---|-------------|-------------|-------------|
| C | 0.13350000  | 2.35200000  | -1.85510000 |
| C | 0.31380000  | 1.12960000  | -2.76690000 |
| C | 0.24650000  | -0.22760000 | -2.07550000 |
| O | 1.43840000  | -0.42990000 | -1.28930000 |
| H | 0.64370000  | -1.70530000 | 0.15460000  |
| H | 2.04710000  | 2.00880000  | -0.87940000 |
| H | 1.17820000  | 3.43550000  | -0.30110000 |
| H | 0.32520000  | 3.25340000  | -2.45590000 |
| H | -0.91540000 | 2.42070000  | -1.52680000 |
| H | 1.28640000  | 1.18910000  | -3.28060000 |
| H | -0.45550000 | 1.15260000  | -3.55520000 |
| H | 0.19870000  | -1.03590000 | -2.82380000 |
| H | -0.65030000 | -0.29930000 | -1.43990000 |

### S-COT (*syn-P*)

$$E = -3628.77$$

$$H = -3466.22$$

$$G = -3499.38$$

$$N_{\text{imag}} = 0$$

|   |             |             |             |
|---|-------------|-------------|-------------|
| N | -0.32840000 | -0.99390000 | 2.09330000  |
| C | 0.70600000  | -1.61420000 | 3.01040000  |
| O | -0.84860000 | 0.09120000  | 2.70560000  |
| C | -1.43370000 | -1.99320000 | 1.83660000  |
| H | 1.14870000  | -2.52320000 | 2.58310000  |
| H | 0.18530000  | -1.83850000 | 3.94520000  |
| H | 1.46400000  | -0.84630000 | 3.18020000  |
| H | -0.08720000 | 1.28980000  | 1.18580000  |
| H | -2.17530000 | -1.48030000 | 1.22060000  |
| H | -1.86250000 | -2.22790000 | 2.81490000  |
| H | -1.06650000 | -2.89190000 | 1.32790000  |
| C | 0.93340000  | -1.73960000 | -0.09220000 |
| H | 1.84930000  | -1.38220000 | -0.58170000 |
| C | 0.37770000  | -0.65230000 | 0.76120000  |
| C | 0.41990000  | 0.64620000  | 0.45860000  |
| C | 1.08680000  | 1.24650000  | -0.74540000 |
| C | 0.16040000  | 1.44610000  | -1.96730000 |
| C | -0.17400000 | 0.17860000  | -2.76970000 |
| C | -1.03710000 | -0.87170000 | -2.04190000 |
| S | -0.21310000 | -2.37640000 | -1.41200000 |
| H | 1.19880000  | -2.64530000 | 0.46670000  |
| H | 1.95340000  | 0.64200000  | -1.06060000 |
| H | 1.48430000  | 2.23020000  | -0.45540000 |
| H | 0.64890000  | 2.15770000  | -2.65030000 |
| H | -0.77380000 | 1.92780000  | -1.63810000 |
| H | 0.75220000  | -0.29470000 | -3.13040000 |
| H | -0.72020000 | 0.49680000  | -3.67140000 |

|   |             |             |             |
|---|-------------|-------------|-------------|
| H | -1.76710000 | -1.31410000 | -2.73460000 |
| H | -1.61250000 | -0.41010000 | -1.22760000 |

---

**Table S9.** Electronic energies (kcal mol<sup>-1</sup>), enthalpies (kcal mol<sup>-1</sup>), Gibbs free energies (kcal mol<sup>-1</sup>), the number of imaginary vibrational frequencies (and their wavelength), and cartesian coordinates (Å), for all stationary points of the newly proposed biorthogonal reagents (reactant complex RC, transition state TS, product P), computed at ZORA-BP86/TZ2P using AMS2021.

---

**DF-BCN (reactant)**

$E = -2801.01$

$H = -2691.42$

$G = -2719.89$

$N_{\text{imag}} = 0$

|   |             |             |             |
|---|-------------|-------------|-------------|
| C | 0.05779948  | -2.81398247 | -0.92053611 |
| C | 1.58226806  | -2.72496541 | -0.88387334 |
| C | 0.00000000  | 0.00000000  | 0.00000000  |
| C | 2.42770448  | -2.05998604 | 0.18886274  |
| C | 1.21305870  | -0.00000000 | 0.00000000  |
| C | 2.57112774  | -0.51643849 | 0.00023595  |
| H | 2.00266451  | -2.24454084 | 1.18565520  |
| H | 3.43319529  | -2.51035815 | 0.18493219  |
| H | 3.18237486  | -0.08472494 | 0.80614273  |
| H | 3.08012633  | -0.28640258 | -0.94862401 |
| C | -0.90487034 | -2.27121114 | 0.11965620  |
| H | -0.51097017 | -2.39430562 | 1.13715305  |
| H | -1.85941589 | -2.81774959 | 0.06743331  |
| C | -1.23707612 | -0.77338111 | -0.04439264 |
| F | -2.12673831 | -0.40088282 | 0.95455065  |
| F | -1.91353429 | -0.57005801 | -1.24278514 |
| C | 0.88907307  | -4.04643823 | -0.63758493 |
| H | 0.95071259  | -4.83355713 | -1.38732341 |
| H | -0.34691481 | -2.75723013 | -1.93230359 |
| H | 2.01591343  | -2.62022662 | -1.88183685 |
| H | 0.88648967  | -4.40918386 | 0.39122836  |

**DCI-BCN (reactant)**

$E = -2705.99$

$H = -2597.77$

$G = -2627.88$

$N_{\text{imag}} = 0$

|   |            |             |             |
|---|------------|-------------|-------------|
| C | 0.06103172 | -2.81747609 | -0.92857634 |
| C | 1.58532531 | -2.72569246 | -0.88202710 |
| C | 0.00114397 | -0.04182981 | -0.00879780 |
| C | 2.42850985 | -2.05571946 | 0.18995261  |
| C | 1.21330797 | 0.00461102  | -0.00055983 |

|    |             |             |             |
|----|-------------|-------------|-------------|
| C  | 2.57196555  | -0.51276032 | 0.00006376  |
| H  | 2.00242191  | -2.23845782 | 1.18670726  |
| H  | 3.43388217  | -2.50655363 | 0.18757998  |
| H  | 3.18492638  | -0.08073551 | 0.80453454  |
| H  | 3.08056545  | -0.28270187 | -0.94925668 |
| C  | -0.91531734 | -2.28056144 | 0.10238352  |
| H  | -0.52324209 | -2.40591402 | 1.12096739  |
| H  | -1.86309083 | -2.83557997 | 0.04462690  |
| C  | -1.23888500 | -0.76815407 | -0.04542664 |
| Cl | -2.35324271 | -0.27714181 | 1.32145271  |
| Cl | -2.12809839 | -0.46853298 | -1.62015446 |
| C  | 0.89295768  | -4.04619346 | -0.62877252 |
| H  | 0.95753245  | -4.84002818 | -1.37115978 |
| H  | -0.33696912 | -2.77067415 | -1.94335726 |
| H  | 2.02329829  | -2.62801830 | -1.87885537 |
| H  | 0.88631838  | -4.39980288 | 0.40322054  |

### DCF<sub>3</sub>-BCN (*reactant*)

$$E = -3589.94$$

$$H = -3461.71$$

$$G = -3498.86$$

$$N_{\text{imag}} = 0$$

|   |             |             |             |
|---|-------------|-------------|-------------|
| C | 0.11931461  | -2.83017196 | -0.97841354 |
| C | 1.63818901  | -2.70437579 | -0.86806900 |
| C | -0.04797472 | -0.05746897 | -0.03921183 |
| C | 2.42571552  | -2.00750542 | 0.22861890  |
| C | 1.15997401  | 0.01535388  | -0.00276309 |
| C | 2.53265983  | -0.46310915 | 0.03567684  |
| H | 1.97105060  | -2.19697695 | 1.21134999  |
| H | 3.44151191  | -2.43311961 | 0.26184390  |
| H | 3.11087059  | -0.01225023 | 0.85514618  |
| H | 3.06045646  | -0.22248210 | -0.90016770 |
| C | -0.91792748 | -2.32596505 | 0.00949160  |
| H | -0.55558543 | -2.46791921 | 1.03421716  |
| H | -1.83576046 | -2.92254487 | -0.09479856 |
| C | -1.30600371 | -0.79462469 | -0.09322641 |
| C | -2.19782475 | -0.43314624 | 1.13984571  |
| C | -2.07258838 | -0.49286698 | -1.42132867 |
| C | 0.96580168  | -4.03647289 | -0.62666244 |
| H | 1.07697908  | -4.83857568 | -1.35443721 |
| H | -0.22519922 | -2.81625325 | -2.01187578 |
| H | 2.11314968  | -2.60685187 | -1.84777257 |
| H | 0.92415205  | -4.37631052 | 0.40920410  |
| F | -2.55165240 | 0.77075443  | -1.47041329 |
| F | -3.12286728 | -1.33614983 | -1.59768401 |
| F | -1.55031158 | -0.74565306 | 2.29413346  |

|   |             |             |             |
|---|-------------|-------------|-------------|
| F | -3.36611047 | -1.12507992 | 1.13799208  |
| F | -2.49809874 | 0.88186240  | 1.19930698  |
| F | -1.25275074 | -0.64908397 | -2.49165564 |

**DF-*p*-MOBO (reactant)**

$E = -3425.27$

$H = -3303.49$

$G = -3334.55$

$N_{\text{imag}} = 0$

|   |             |             |             |
|---|-------------|-------------|-------------|
| C | 2.55072064  | -0.56746836 | 0.03611868  |
| H | 3.17497571  | -0.21808869 | -0.79914852 |
| C | 1.21364362  | 0.00108793  | 0.00379029  |
| C | 0.00089670  | 0.00680713  | -0.00914648 |
| C | -1.22273854 | -0.79007874 | 0.01623578  |
| C | -0.83811609 | -2.28859274 | -0.02720449 |
| C | 0.07388388  | -2.74542853 | 1.10086262  |
| C | 1.49268727  | -2.67984539 | 1.07808978  |
| C | 2.32682965  | -2.11346047 | -0.06160542 |
| H | 3.07300415  | -0.30926568 | 0.96941425  |
| F | -2.04607019 | -0.51552358 | -1.06772471 |
| F | -1.98482462 | -0.52418435 | 1.14238863  |
| H | -1.64332918 | -3.33401603 | 2.25125081  |
| H | -0.35904188 | -4.14914137 | 4.20052069  |
| H | 3.31006929  | -2.60551903 | -0.06133908 |
| H | 1.86171121  | -2.32220343 | -1.03496490 |
| C | 2.19878140  | -3.15853756 | 2.19322714  |
| C | 1.55764088  | -3.68089052 | 3.31482607  |
| C | 0.16594512  | -3.74115611 | 3.33687173  |
| C | -0.55407304 | -3.28146559 | 2.23624866  |
| H | 3.28989603  | -3.12172723 | 2.17306854  |
| H | 2.14323987  | -4.04387893 | 4.15955113  |
| H | -1.77953794 | -2.85484226 | 0.00274171  |
| H | -0.38264202 | -2.45388735 | -1.01213007 |

**DCI-*p*-MOBO (reactant)**

$E = -3329.79$

$H = -3209.39$

$G = -3242.07$

$N_{\text{imag}} = 0$

|   |             |             |             |
|---|-------------|-------------|-------------|
| C | 2.55308526  | -0.56050270 | 0.03740499  |
| H | 3.18466623  | -0.21740649 | -0.79502404 |
| C | 1.21780495  | 0.01365333  | -0.00489940 |
| C | 0.00596727  | -0.02965698 | -0.02179104 |
| C | -1.22442169 | -0.77370770 | 0.00104363  |
| C | -0.85652692 | -2.28885365 | -0.00478983 |
| C | 0.06802257  | -2.74023216 | 1.11762358  |

|    |             |             |             |
|----|-------------|-------------|-------------|
| C  | 1.48748918  | -2.66838089 | 1.08661679  |
| C  | 2.32074762  | -2.10479406 | -0.05578973 |
| H  | 3.07181116  | -0.30101892 | 0.97244520  |
| Cl | -2.24161237 | -0.43163320 | -1.48517903 |
| Cl | -2.22782623 | -0.35182814 | 1.46659551  |
| H  | -1.63799380 | -3.36450016 | 2.26529671  |
| H  | -0.33972495 | -4.19415153 | 4.19844586  |
| H  | 3.30060880  | -2.60375580 | -0.05739488 |
| H  | 1.85150673  | -2.31175219 | -1.02753018 |
| C  | 2.20081671  | -3.15370324 | 2.19450399  |
| C  | 1.56888961  | -3.69248891 | 3.31341350  |
| C  | 0.17816371  | -3.76779726 | 3.33943623  |
| C  | -0.54976792 | -3.29945461 | 2.24790315  |
| H  | 3.29159605  | -3.11171191 | 2.16891583  |
| H  | 2.16143032  | -4.05997376 | 4.15137924  |
| H  | -1.79519336 | -2.85643495 | 0.03654294  |
| H  | -0.40359356 | -2.47202898 | -0.98845177 |

**DCF<sub>3</sub>-*p*-MOBO (reactant)**

$E = -4213.28$

$H = -4072.91$

$G = -4112.45$

$N_{\text{imag}} = 0$

|   |             |             |             |
|---|-------------|-------------|-------------|
| C | 2.50959703  | -0.47823504 | 0.10918472  |
| H | 3.13344101  | -0.09273682 | -0.71027435 |
| C | 1.15794646  | 0.05850194  | 0.07914154  |
| C | -0.05045457 | -0.00653311 | 0.05502453  |
| C | -1.29499455 | -0.76929524 | 0.04191894  |
| C | -0.85917705 | -2.29317217 | 0.03141677  |
| C | 0.08731341  | -2.75668123 | 1.13272530  |
| C | 1.50421263  | -2.64788407 | 1.09383599  |
| C | 2.31858527  | -2.02244864 | -0.03125370 |
| H | 3.01810596  | -0.23318996 | 1.05353213  |
| C | -2.09052409 | -0.48240462 | -1.27500911 |
| C | -2.17428835 | -0.42642694 | 1.28891550  |
| H | -1.58795361 | -3.50605520 | 2.25356160  |
| H | -0.25283923 | -4.40011507 | 4.12609795  |
| H | 3.31037545  | -2.49685673 | -0.05112970 |
| H | 1.85175180  | -2.21162611 | -1.00797184 |
| C | 2.23913011  | -3.16857022 | 2.17145931  |
| C | 1.63335717  | -3.78534484 | 3.26388313  |
| C | 0.24627133  | -3.90846490 | 3.29127332  |
| C | -0.50248922 | -3.40219541 | 2.23181207  |
| H | 3.32796077  | -3.09413099 | 2.14022212  |
| H | 2.24314438  | -4.17801887 | 4.07762722  |
| H | -1.76942167 | -2.90571576 | 0.06269935  |



|   |             |             |             |
|---|-------------|-------------|-------------|
| H | -0.39549919 | -2.44857181 | -0.94941782 |
| F | -2.38056393 | 0.82609101  | -1.43258675 |
| F | -3.25699359 | -1.17562457 | -1.31803208 |
| F | -1.43488621 | -0.46347609 | 2.41973698  |
| F | -3.19387659 | -1.31365376 | 1.44158089  |
| F | -2.72201612 | 0.80868892  | 1.20826642  |
| F | -1.36053127 | -0.86028745 | -2.35840321 |

**DF-O-MOBO (reactant)**

$E = -3199.38$

$H = -3092.42$

$G = -3123.39$

$N_{\text{imag}} = 0$

|   |             |             |             |
|---|-------------|-------------|-------------|
| C | 0.02421741  | -2.66016631 | 0.07914767  |
| C | 1.18869594  | -2.63877755 | -0.95908630 |
| C | 0.02504882  | 0.06537902  | -0.08811920 |
| C | 2.49207045  | -1.96926347 | -0.56522702 |
| C | 1.23924517  | -0.00551882 | -0.10235752 |
| C | 2.52511106  | -0.59315475 | -0.19270526 |
| H | 0.34253419  | -2.29889364 | 1.06496778  |
| H | 1.41385315  | -3.67397806 | -1.24862610 |
| O | -1.16268581 | -1.93783958 | -0.35489072 |
| H | -0.34343593 | -3.68504104 | 0.19569009  |
| H | 0.79265186  | -2.14750235 | -1.86161908 |
| C | -1.26803528 | -0.60637513 | 0.00649024  |
| C | 3.73909835  | 0.04398495  | 0.10441557  |
| C | 4.93191779  | -0.67235253 | 0.04335693  |
| C | 4.91350851  | -2.02487941 | -0.30416840 |
| C | 3.70508922  | -2.66134477 | -0.60219733 |
| H | 3.73365973  | 1.09595647  | 0.38624439  |
| H | 5.87519423  | -0.17782499 | 0.27312290  |
| H | 5.84498216  | -2.58937171 | -0.34599465 |
| H | 3.70465790  | -3.71717844 | -0.87789160 |
| F | -1.76012642 | -0.50346326 | 1.30681116  |
| F | -2.23181385 | -0.06989248 | -0.79798338 |

**DIBBO (reactant)**

$E = -3846.65$

$H = -3717.98$

$G = -3750.56$

$N_{\text{imag}} = 0$

|   |            |             |             |
|---|------------|-------------|-------------|
| C | 0.08854613 | -2.68564814 | 0.59062693  |
| C | 1.13507498 | -2.68564814 | -0.59062693 |
| C | 0.00000000 | 0.00000000  | 0.00000000  |
| C | 2.47919498 | -2.03462109 | -0.30834539 |
| C | 1.22362111 | 0.00000000  | 0.00000000  |

|   |             |             |             |
|---|-------------|-------------|-------------|
| C | 2.48994239  | -0.59276137 | -0.06678415 |
| H | 0.54034873  | -2.17804493 | 1.45478977  |
| H | -2.36387797 | -3.85549751 | 0.50106850  |
| C | -1.25557386 | -2.03462109 | 0.30834539  |
| H | -0.09940755 | -3.72324811 | 0.89606508  |
| H | -4.58149935 | -2.90992796 | 0.15200227  |
| C | -1.26632128 | -0.59276137 | 0.06678415  |
| B | 3.88747983  | -0.27014379 | 0.09422762  |
| C | 5.19246092  | -0.85961467 | 0.11749379  |
| C | 4.94417248  | -2.23700433 | -0.11828186 |
| C | 3.66374148  | -2.78402273 | -0.31609846 |
| H | 1.32302866  | -3.72324811 | -0.89606508 |
| H | 6.19941159  | -0.48697692 | 0.26513107  |
| H | 5.80512046  | -2.90992796 | -0.15200227 |
| H | 3.58749909  | -3.85549751 | -0.50106850 |
| B | -2.66385872 | -0.27014379 | -0.09422762 |
| C | -3.96883980 | -0.85961467 | -0.11749379 |
| C | -3.72055137 | -2.23700433 | 0.11828186  |
| C | -2.44012037 | -2.78402273 | 0.31609846  |
| H | 0.68327238  | -2.17804493 | -1.45478977 |
| H | -4.97579047 | -0.48697692 | -0.26513107 |

**DITO (reactant)**

$E = -3224.36$

$H = -3119.60$

$G = -3150.55$

$N_{\text{imag}} = 0$

|   |             |             |             |
|---|-------------|-------------|-------------|
| C | 0.07682202  | -2.81591158 | 0.58556178  |
| C | 1.15101674  | -2.81591158 | -0.58556178 |
| C | 0.00000000  | 0.00000000  | 0.00000000  |
| C | 2.43213989  | -2.05898919 | -0.33491851 |
| C | 1.22783876  | 0.00000000  | 0.00000000  |
| C | 2.44624143  | -0.67119751 | -0.12078902 |
| H | 0.55683744  | -2.40030512 | 1.48272494  |
| S | 4.06425373  | -0.06820920 | 0.08955218  |
| C | -1.20430114 | -2.05898919 | 0.33491851  |
| H | -0.17970651 | -3.85670463 | 0.82195900  |
| C | 4.72237461  | -1.65023846 | -0.10101322 |
| C | -1.21840267 | -0.67119751 | 0.12078902  |
| C | 3.74524959  | -2.59762733 | -0.30732620 |
| H | 1.40754527  | -3.85670463 | -0.82195900 |
| H | 0.67100131  | -2.40030512 | -1.48272494 |
| S | -2.83641498 | -0.06820920 | -0.08955218 |
| C | -3.49453585 | -1.65023846 | 0.10101322  |
| C | -2.51741083 | -2.59762733 | 0.30732620  |
| H | -4.56993630 | -1.79117557 | 0.06555976  |

|   |             |             |             |
|---|-------------|-------------|-------------|
| H | -2.73887008 | -3.65363034 | 0.45426188  |
| H | 3.96670884  | -3.65363034 | -0.45426188 |
| H | 5.79777505  | -1.79117557 | -0.06555976 |

**F-COD (reactant)**

$E = -2247.79$

$H = -2170.87$

$G = -2197.54$

$N_{\text{imag}} = 0$

|   |             |             |             |
|---|-------------|-------------|-------------|
| C | 0.57226549  | 0.55961320  | 0.97287107  |
| C | -0.57226549 | -0.55961320 | 0.97287107  |
| C | -0.01460343 | 0.61280294  | -1.76256842 |
| C | -0.28479425 | -1.80299046 | 0.19088391  |
| C | 0.01460343  | -0.61280294 | -1.76256842 |
| C | -0.05365134 | -1.87395916 | -1.14463745 |
| H | 1.48990631  | 0.10256538  | 0.58034205  |
| H | -1.48990631 | -0.10256538 | 0.58034205  |
| C | 0.28479425  | 1.80299046  | 0.19088391  |
| H | 0.76872995  | 0.85723985  | 2.00940140  |
| H | -0.76872995 | -0.85723985 | 2.00940140  |
| C | 0.05365134  | 1.87395916  | -1.14463745 |
| F | 0.21894140  | 2.94192741  | 0.93751647  |
| F | -0.21894140 | -2.94192741 | 0.93751647  |
| H | 0.13575719  | -2.82367554 | -1.64239483 |
| H | -0.13575719 | 2.82367554  | -1.64239483 |

**CF<sub>3</sub>-COD (reactant)**

$E = -3048.91$

$H = -2953.22$

$G = -2989.39$

$N_{\text{imag}} = 0$

|   |             |             |             |
|---|-------------|-------------|-------------|
| C | 0.51317841  | 0.56717581  | 0.95428450  |
| C | -0.61493721 | -0.56470990 | 0.85674903  |
| C | 0.18013645  | 0.60753851  | -1.78408508 |
| C | -0.21852288 | -1.84032455 | 0.15916822  |
| C | 0.19370486  | -0.61705917 | -1.78028969 |
| C | 0.12107565  | -1.87612385 | -1.16033782 |
| H | 1.45044377  | 0.13860467  | 0.57723163  |
| H | -1.47100311 | -0.13820342 | 0.31865129  |
| C | 0.24636722  | 1.83959738  | 0.19219574  |
| H | 0.67073244  | 0.80063668  | 2.01256882  |
| H | -0.95638736 | -0.79357493 | 1.87180349  |
| C | 0.14365285  | 1.86936737  | -1.16657649 |
| C | 0.08412034  | 3.10196261  | 0.99439747  |
| C | -0.19955487 | -3.09893838 | 0.98310469  |
| H | 0.36015383  | -2.80760213 | -1.67014374 |

|   |             |             |             |
|---|-------------|-------------|-------------|
| H | -0.00143940 | 2.79852994  | -1.71459887 |
| F | 0.67378820  | -2.98261018 | 2.03137883  |
| F | 0.16395568  | -4.19961528 | 0.27776234  |
| F | -1.42449656 | -3.36025609 | 1.53136697  |
| F | 1.19337615  | 3.36487062  | 1.74922777  |
| F | -0.96083544 | 2.99099414  | 1.87240467  |
| F | -0.14750901 | 4.19974015  | 0.23121296  |

**DF-BCN (TS)**

$E = -4107.50$

$H = -3936.08$

$G = -3972.66$

$N_{\text{imag}} = 1, \nu = -103.6958 \text{ i cm}^{-1}$

|   |             |             |             |
|---|-------------|-------------|-------------|
| C | 2.31461533  | 2.65588954  | -1.23290548 |
| H | 3.33606597  | 2.25410929  | -1.22402120 |
| H | 2.35703604  | 3.75303903  | -1.32575818 |
| H | 1.76340495  | 2.24326996  | -2.08355288 |
| C | 2.28461261  | 2.70685615  | 1.22905784  |
| H | 2.32344788  | 3.80693650  | 1.27815513  |
| H | 3.30704986  | 2.30865347  | 1.26079014  |
| H | 1.71421414  | 2.32795753  | 2.08276149  |
| O | 0.31606559  | 2.69093820  | -0.02553424 |
| H | -0.18232076 | 1.74066982  | -0.01432970 |
| N | 1.62826506  | 2.25730662  | -0.00120536 |
| C | 0.06322019  | -2.81501451 | -0.95034232 |
| C | 1.57964163  | -2.72254471 | -0.90964567 |
| C | -0.04196803 | 0.13563305  | 0.01711125  |
| C | 2.35767648  | -2.07207049 | 0.21497843  |
| C | 1.20882871  | 0.11605688  | 0.03093948  |
| C | 2.52097299  | -0.53929742 | 0.04797516  |
| H | 1.87678658  | -2.27267121 | 1.18296683  |
| H | 3.36263031  | -2.52100938 | 0.26891056  |
| H | 3.14466125  | -0.14726905 | 0.86660955  |
| H | 3.06532024  | -0.32547681 | -0.88698762 |
| C | -0.84415011 | -2.28347459 | 0.13814802  |
| H | -0.39986297 | -2.41844696 | 1.13328338  |
| H | -1.79843153 | -2.83217196 | 0.13268698  |
| C | -1.18311649 | -0.79597314 | -0.00572204 |
| F | -2.07956146 | -0.46947779 | 1.01514953  |
| F | -1.89652208 | -0.61721364 | -1.19582563 |
| C | 0.89501259  | -4.05657227 | -0.71393045 |
| H | 0.95986817  | -4.80716062 | -1.49985894 |
| H | -0.36560510 | -2.72366093 | -1.94907222 |
| H | 2.03926411  | -2.57810945 | -1.89072467 |
| H | 0.89364603  | -4.46574626 | 0.29715199  |

**DCI-BCN (TS)**

$E = -4011.62$

$H = -3841.59$

$G = -3879.75$

$N_{\text{imag}} = 1, v = -114.7806 \text{ i cm}^{-1}$

|    |             |             |             |
|----|-------------|-------------|-------------|
| C  | 0.11088980  | -2.67028955 | -0.95994093 |
| C  | 1.62440226  | -2.54887768 | -0.90598956 |
| C  | -0.07061935 | 0.25281462  | 0.01929204  |
| C  | 2.37995367  | -1.88506874 | 0.22603584  |
| C  | 1.18178606  | 0.27608269  | 0.03875374  |
| C  | 2.50868473  | -0.34930141 | 0.06422744  |
| H  | 1.89728575  | -2.09994212 | 1.19012215  |
| H  | 3.39436626  | -2.31141957 | 0.28494605  |
| H  | 3.11761676  | 0.05486673  | 0.88824328  |
| H  | 3.05535703  | -0.12120552 | -0.86624083 |
| C  | -0.81848600 | -2.17054846 | 0.12538726  |
| H  | -0.36656732 | -2.29946907 | 1.11893324  |
| H  | -1.74934110 | -2.75539277 | 0.11835015  |
| C  | -1.18850013 | -0.67974906 | 0.00992644  |
| Cl | -2.31274033 | -0.29358288 | 1.42033301  |
| Cl | -2.16032499 | -0.43020565 | -1.53802204 |
| C  | 0.96536633  | -3.89580758 | -0.71511171 |
| H  | 1.04762646  | -4.64514860 | -1.50057414 |
| H  | -0.31332063 | -2.58938061 | -1.96127860 |
| H  | 2.08909779  | -2.39435723 | -1.88315404 |
| H  | 0.96551425  | -4.30489157 | 0.29600855  |
| C  | 2.22912547  | 2.81239071  | -1.24715763 |
| H  | 3.25847464  | 2.43181067  | -1.23169199 |
| H  | 2.24897417  | 3.90913788  | -1.34921263 |
| H  | 1.68852036  | 2.38079056  | -2.09512259 |
| C  | 2.19091099  | 2.88442260  | 1.21549844  |
| H  | 2.20661325  | 3.98524996  | 1.25461019  |
| H  | 3.22108563  | 2.50757657  | 1.25312386  |
| H  | 1.62563404  | 2.50087194  | 2.07045209  |
| O  | 0.22712042  | 2.81641657  | -0.04519858 |
| H  | -0.24864090 | 1.85516367  | -0.02641857 |
| N  | 1.54733046  | 2.41136649  | -0.01322855 |

**DCF<sub>3</sub>-BCN (TS)**

$E = -4894.53$

$H = -4704.76$

$G = -4749.59$

$N_{\text{imag}} = 1, v = -168.7268 \text{ i cm}^{-1}$

|   |             |             |             |
|---|-------------|-------------|-------------|
| C | 0.18467935  | -2.65415024 | -1.04340624 |
| C | 1.69034508  | -2.52115990 | -0.89753384 |
| C | -0.10212179 | 0.27303246  | -0.03263744 |

|   |             |             |             |
|---|-------------|-------------|-------------|
| C | 2.36212616  | -1.86168950 | 0.28771317  |
| C | 1.15029130  | 0.29694318  | 0.04521576  |
| C | 2.47714927  | -0.32475373 | 0.14900693  |
| H | 1.82359555  | -2.09541686 | 1.21707530  |
| H | 3.37683740  | -2.27459034 | 0.40600010  |
| H | 3.02876517  | 0.07747928  | 1.01338469  |
| H | 3.08013907  | -0.08305321 | -0.74223727 |
| C | -0.80404134 | -2.19019170 | 0.00465075  |
| H | -0.37776776 | -2.34241702 | 1.00339353  |
| H | -1.70569936 | -2.81640500 | -0.04970869 |
| C | -1.24067599 | -0.68528292 | -0.05771835 |
| C | -2.12565517 | -0.41504172 | 1.20607697  |
| C | -2.08307946 | -0.42057554 | -1.34938370 |
| C | 1.03480221  | -3.87558261 | -0.76042818 |
| H | 1.16970339  | -4.61481397 | -1.54806515 |
| H | -0.17369157 | -2.57757770 | -2.06887879 |
| H | 2.21359128  | -2.34990475 | -1.84163213 |
| H | 0.97881069  | -4.29644844 | 0.24431588  |
| C | 2.25738810  | 2.75098008  | -1.26126684 |
| H | 3.27997360  | 2.35952690  | -1.18749489 |
| H | 2.29517974  | 3.84397836  | -1.38953676 |
| H | 1.75002651  | 2.30324058  | -2.12109727 |
| C | 2.10766872  | 2.88905152  | 1.19594163  |
| H | 2.13603082  | 3.98976789  | 1.20531619  |
| H | 3.12959524  | 2.50026917  | 1.29025529  |
| H | 1.49779431  | 2.53580677  | 2.03287649  |
| O | 0.20344768  | 2.80732904  | -0.15232466 |
| H | -0.27882178 | 1.82542070  | -0.12505546 |
| N | 1.51118672  | 2.39428051  | -0.04962924 |
| F | -1.28567756 | -0.45814384 | -2.45153839 |
| F | -2.69306920 | 0.78666347  | -1.34862366 |
| F | -3.04990200 | -1.35994201 | -1.53272269 |
| F | -1.41497212 | -0.68618751 | 2.33746341  |
| F | -3.22985360 | -1.20904218 | 1.23541498  |
| F | -2.54607473 | 0.86385412  | 1.30652169  |

**DF-*p*-MOBO (TS)**

$E = -4732.95$

$H = -4548.58$

$G = -4589.03$

$N_{\text{imag}} = 1, \nu = -7.4465 \text{ i cm}^{-1}$

|   |            |            |             |
|---|------------|------------|-------------|
| C | 2.35885701 | 2.96107781 | -1.22512859 |
| H | 3.43120719 | 2.72837453 | -1.18335452 |
| H | 2.23262156 | 4.05116033 | -1.35175080 |
| H | 1.91165403 | 2.44940179 | -2.08454331 |
| C | 2.31043300 | 3.04798521 | 1.21254506  |

|   |             |             |             |
|---|-------------|-------------|-------------|
| H | 2.24179786  | 4.15072703  | 1.22727979  |
| H | 3.36704836  | 2.75378374  | 1.26616896  |
| H | 1.78085066  | 2.64665240  | 2.08305179  |
| O | 0.35591568  | 2.86215802  | -0.04376309 |
| H | -0.10162013 | 1.96934269  | -0.00861891 |
| N | 1.72477245  | 2.47831128  | 0.00008038  |
| C | 2.48713958  | -0.61052522 | 0.04821918  |
| H | 3.09382593  | -0.25519953 | -0.79754854 |
| C | 1.16456369  | -0.00391206 | 0.05086500  |
| C | -0.06341495 | 0.03245925  | 0.05125986  |
| C | -1.23950932 | -0.84533657 | 0.04592833  |
| C | -0.84996213 | -2.33618695 | -0.01249229 |
| C | 0.04975993  | -2.80284460 | 1.11695320  |
| C | 1.46570799  | -2.73644789 | 1.08685333  |
| C | 2.27212765  | -2.15269701 | -0.05952440 |
| H | 3.03458696  | -0.36418940 | 0.97065915  |
| F | -2.05522028 | -0.57455327 | -1.05045748 |
| F | -2.03139645 | -0.61608866 | 1.16473952  |
| H | -1.66303710 | -3.40164749 | 2.26961406  |
| H | -0.36433675 | -4.23455730 | 4.20439144  |
| H | 3.26166195  | -2.63169351 | -0.08019443 |
| H | 1.79425482  | -2.36255455 | -1.02658816 |
| C | 2.18204746  | -3.22535754 | 2.19063962  |
| C | 1.54655827  | -3.75918667 | 3.31012248  |
| C | 0.15418680  | -3.81647322 | 3.34160111  |
| C | -0.57392274 | -3.34801886 | 2.25001624  |
| H | 3.27313381  | -3.19093538 | 2.16184299  |
| H | 2.13639785  | -4.13330919 | 4.14708788  |
| H | -1.78894481 | -2.90690917 | -0.00032533 |
| H | -0.38329978 | -2.49032518 | -0.99400164 |

### DCI-*p*-MOBO (TS)

$E = -4636.85$

$H = -4453.97$

$G = -4495.65$

$N_{\text{imag}} = 1, \nu = -28.0227 \text{ i cm}^{-1}$

|   |             |             |             |
|---|-------------|-------------|-------------|
| C | 2.48571557  | -0.47396875 | 0.01632113  |
| H | 3.10621011  | -0.12623504 | -0.82333645 |
| C | 1.16099820  | 0.13327707  | -0.00788807 |
| C | -0.07220202 | 0.11659071  | -0.02203564 |
| C | -1.22738772 | -0.75843280 | -0.01378036 |
| C | -0.83113045 | -2.25834292 | -0.01685685 |
| C | 0.07914568  | -2.69405980 | 1.11743557  |
| C | 1.49314272  | -2.59787580 | 1.08165128  |
| C | 2.28448698  | -2.01705209 | -0.07605208 |
| H | 3.01938424  | -0.21588855 | 0.94404414  |

|    |             |             |             |
|----|-------------|-------------|-------------|
| Cl | -2.25015120 | -0.46509991 | -1.51680476 |
| Cl | -2.28255916 | -0.39121167 | 1.43997157  |
| H  | -1.61504392 | -3.34326624 | 2.27021688  |
| H  | -0.29219365 | -4.14165575 | 4.20311866  |
| H  | 3.27700935  | -2.48975086 | -0.10099301 |
| H  | 1.79981467  | -2.23885357 | -1.03694705 |
| C  | 2.22370407  | -3.06483564 | 2.18576394  |
| C  | 1.60373122  | -3.60985785 | 3.30841276  |
| C  | 0.21362651  | -3.70916764 | 3.33990990  |
| C  | -0.52824231 | -3.25900757 | 2.25012077  |
| H  | 3.31360681  | -3.00463315 | 2.15409030  |
| H  | 2.20442558  | -3.96496962 | 4.14601111  |
| H  | -1.75665910 | -2.84790139 | 0.00302261  |
| H  | -0.35491948 | -2.43140951 | -0.99148856 |
| C  | 2.28021603  | 3.03079249  | -1.17310602 |
| H  | 3.33597937  | 2.72908425  | -1.17005623 |
| H  | 2.22074807  | 4.13235879  | -1.21878579 |
| H  | 1.78500943  | 2.60973977  | -2.05427789 |
| C  | 2.22667026  | 2.98583367  | 1.27339677  |
| H  | 2.16301948  | 4.08486942  | 1.35708510  |
| H  | 3.28192174  | 2.68407099  | 1.30518374  |
| H  | 1.69448688  | 2.53154277  | 2.11557681  |
| O  | 0.27288580  | 2.87209257  | 0.00345058  |
| H  | -0.17478235 | 1.96142717  | -0.01140064 |
| N  | 1.63413219  | 2.50192240  | 0.02709899  |

### DCF<sub>3</sub>-*p*-MOBO (TS)

$$E = -5519.74$$

$$H = -5317.20$$

$$G = -5364.81$$

$$N_{\text{imag}} = 1, \nu = -62.2081 \text{ i cm}^{-1}$$

|   |             |             |             |
|---|-------------|-------------|-------------|
| C | 2.44298147  | -0.38718853 | -0.00534644 |
| H | 3.04357394  | -0.03260760 | -0.85763225 |
| C | 1.12266209  | 0.24435217  | 0.01181408  |
| C | -0.12133851 | 0.22778349  | 0.01936972  |
| C | -1.26953955 | -0.70968598 | 0.00137184  |
| C | -0.81622304 | -2.21809877 | 0.03643742  |
| C | 0.11805446  | -2.64543952 | 1.15323892  |
| C | 1.52681302  | -2.53021640 | 1.07683574  |
| C | 2.26278045  | -1.92671551 | -0.10330646 |
| H | 3.00466908  | -0.13825819 | 0.90900991  |
| C | -2.05345485 | -0.50214698 | -1.33942162 |
| C | -2.20469343 | -0.38418314 | 1.21284536  |
| H | -1.52891031 | -3.36780387 | 2.33522143  |
| H | -0.13591727 | -4.18520100 | 4.20519325  |
| H | 3.26123565  | -2.38275096 | -0.16924281 |



|   |             |             |             |
|---|-------------|-------------|-------------|
| H | 1.74707073  | -2.15201301 | -1.04718060 |
| C | 2.29976382  | -3.00674126 | 2.14741274  |
| C | 1.72314095  | -3.58870599 | 3.27430468  |
| C | 0.33645291  | -3.71861296 | 3.34080150  |
| C | -0.44525852 | -3.25587414 | 2.28508119  |
| H | 3.38707393  | -2.92829902 | 2.08288077  |
| H | 2.35379976  | -3.95181451 | 4.08599732  |
| H | -1.71732264 | -2.84350936 | 0.06935054  |
| H | -0.33777359 | -2.39985940 | -0.93299308 |
| C | 2.21521399  | 2.92298370  | -1.10563016 |
| H | 3.24673315  | 2.54851888  | -1.12980246 |
| H | 2.23011404  | 4.02499274  | -1.12761840 |
| H | 1.66948595  | 2.55312106  | -1.97933980 |
| C | 2.20787916  | 2.81412150  | 1.35197797  |
| H | 2.22042721  | 3.90977869  | 1.47204343  |
| H | 3.23976732  | 2.43997278  | 1.34825494  |
| H | 1.65836093  | 2.36623250  | 2.18582280  |
| O | 0.22735904  | 2.84721664  | 0.11573018  |
| H | -0.25607259 | 1.91880071  | 0.07929520  |
| N | 1.55230018  | 2.42530198  | 0.10142817  |
| F | -1.25999458 | -0.82531210 | -2.39900429 |
| F | -2.45983459 | 0.77071306  | -1.52973487 |
| F | -3.15339902 | -1.29799178 | -1.41340007 |
| F | -1.49645450 | -0.37022723 | 2.36753787  |
| F | -3.19213663 | -1.31059774 | 1.36035162  |
| F | -2.80585179 | 0.82377216  | 1.10123787  |

### DF-O-MOBO (TS)

$$E = -4504.99$$

$$H = -4336.54$$

$$G = -4375.21$$

$$N_{\text{imag}} = 1, \nu = -131.5332 \text{ i cm}^{-1}$$

|   |             |             |             |
|---|-------------|-------------|-------------|
| C | 2.20226885  | 2.57623958  | -1.46242560 |
| H | 3.21982362  | 2.16993462  | -1.41295506 |
| H | 2.23855592  | 3.63344590  | -1.76867512 |
| H | 1.61502869  | 2.00905945  | -2.19019134 |
| C | 2.22577245  | 3.18827548  | 0.92718208  |
| H | 2.11724448  | 4.27012342  | 0.75465568  |
| H | 3.29138624  | 2.93369700  | 0.95160161  |
| H | 1.75390276  | 2.92459634  | 1.87860635  |
| O | 0.23902124  | 2.78598267  | -0.20462495 |
| H | -0.21566036 | 1.82149928  | 0.04029104  |
| N | 1.56563415  | 2.43499083  | -0.14785543 |
| C | 0.08241227  | -2.52334328 | -0.29359238 |
| C | 1.18315003  | -2.06679522 | -1.29442194 |
| C | -0.00435325 | 0.32717043  | 0.32768798  |

|   |             |             |             |
|---|-------------|-------------|-------------|
| C | 2.46421790  | -1.59285306 | -0.65449386 |
| C | 1.25405009  | 0.311110022 | 0.26518692  |
| C | 2.49094150  | -0.40094114 | 0.12510077  |
| H | 0.46599889  | -2.56448256 | 0.73463890  |
| H | 1.41546076  | -2.89931017 | -1.97177079 |
| O | -1.11491030 | -1.71646634 | -0.33440721 |
| H | -0.27512055 | -3.52342993 | -0.56179429 |
| H | 0.74381665  | -1.26905978 | -1.91132511 |
| C | -1.13081070 | -0.61044907 | 0.49443976  |
| C | 3.68987339  | -0.01568753 | 0.75313854  |
| C | 4.84920969  | -0.77292566 | 0.61099762  |
| C | 4.83053864  | -1.93193277 | -0.16751646 |
| C | 3.64453681  | -2.33220620 | -0.78503801 |
| H | 3.69813147  | 0.87496617  | 1.37764618  |
| H | 5.76535591  | -0.46222154 | 1.11296624  |
| H | 5.73498404  | -2.52819677 | -0.28746640 |
| H | 3.62897371  | -3.24487686 | -1.38329331 |
| F | -1.18484605 | -1.02425145 | 1.83277858  |
| F | -2.33976566 | -0.01325383 | 0.24882906  |

### DIBBO (TS)

$$E = -5150.71$$

$$H = -4960.46$$

$$G = -5001.70$$

$$N_{\text{imag}} = 1, \nu = -108.6838 \text{ i cm}^{-1}$$

|   |             |             |             |
|---|-------------|-------------|-------------|
| C | 2.29226623  | 2.62334309  | -1.26889207 |
| H | 3.25919055  | 2.11150434  | -1.36873889 |
| H | 2.44720477  | 3.71285940  | -1.33674255 |
| H | 1.62952453  | 2.29824772  | -2.07629811 |
| C | 2.46823199  | 2.59224713  | 1.18353709  |
| H | 2.71678304  | 3.66641451  | 1.22172705  |
| H | 3.41664235  | 2.02462997  | 1.16307713  |
| H | 1.90351679  | 2.30981844  | 2.07638107  |
| O | 0.39133346  | 2.73759584  | 0.09905777  |
| H | -0.13444036 | 1.80966014  | 0.08664602  |
| N | 1.68256018  | 2.24853610  | 0.00586763  |
| C | 0.08431933  | -2.66644672 | 0.57239822  |
| C | 1.11181361  | -2.62042031 | -0.61691287 |
| C | -0.11149820 | 0.16398115  | 0.04357344  |
| C | 2.43127552  | -1.96746554 | -0.26993704 |
| C | 1.14741940  | 0.10964347  | 0.05119827  |
| C | 2.39653453  | -0.54800451 | 0.03947381  |
| H | 0.52582010  | -2.14521453 | 1.43337837  |
| H | -2.31027595 | -3.91149786 | 0.41895414  |
| C | -1.26365355 | -2.04725719 | 0.27633055  |
| H | -0.07009397 | -3.70961149 | 0.87753940  |

|   |             |             |             |
|---|-------------|-------------|-------------|
| H | -4.55003142 | -3.04644759 | 0.00746607  |
| C | -1.30627242 | -0.60896966 | 0.05812699  |
| B | 3.77539555  | -0.22137277 | 0.32811877  |
| C | 5.08793640  | -0.79086933 | 0.40794616  |
| C | 4.88149731  | -2.15599341 | 0.07245433  |
| C | 3.62609467  | -2.70310247 | -0.24126325 |
| H | 1.30610454  | -3.64058373 | -0.97291236 |
| H | 6.07560097  | -0.41524134 | 0.64920790  |
| H | 5.75386256  | -2.81472578 | 0.05899735  |
| H | 3.57488203  | -3.76386945 | -0.48722592 |
| B | -2.71509470 | -0.34456867 | -0.13997101 |
| C | -4.00113154 | -0.97116689 | -0.22146507 |
| C | -3.71399036 | -2.34174320 | 0.00751842  |
| C | -2.42070842 | -2.84161125 | 0.24121604  |
| H | 0.65502144  | -2.06991200 | -1.45146551 |
| H | -5.01380868 | -0.62783058 | -0.39801432 |

### DITO (TS)

$$E = -4531.25$$

$$H = -4363.89$$

$$G = -4403.50$$

$$N_{\text{imag}} = 1, \nu = -73.0722 \text{ i cm}^{-1}$$

|   |             |             |             |
|---|-------------|-------------|-------------|
| C | 2.36936472  | 2.63413110  | -1.24401521 |
| H | 3.39745988  | 2.25428094  | -1.20011208 |
| H | 2.38481869  | 3.72614440  | -1.39400232 |
| H | 1.84311727  | 2.16106928  | -2.07857939 |
| C | 2.28461869  | 2.84531456  | 1.20888615  |
| H | 2.25217720  | 3.94697185  | 1.18929562  |
| H | 3.32739500  | 2.51256620  | 1.27743070  |
| H | 1.72800149  | 2.48161824  | 2.07805503  |
| O | 0.34996668  | 2.68335460  | -0.07416667 |
| H | -0.12813878 | 1.74383882  | -0.01956638 |
| N | 1.67712206  | 2.28243487  | -0.00105484 |
| C | 0.07033397  | -2.91175004 | 0.48644700  |
| C | 1.13807420  | -2.77031662 | -0.67109269 |
| C | -0.04473243 | 0.10224027  | 0.11363504  |
| C | 2.39601867  | -2.03978960 | -0.29344806 |
| C | 1.21761452  | 0.07422604  | 0.13655427  |
| C | 2.40187702  | -0.67952714 | 0.04578916  |
| H | 0.55016784  | -2.61465732 | 1.42947558  |
| S | 4.02078240  | -0.14998338 | 0.44089400  |
| C | -1.19131725 | -2.11378320 | 0.30350379  |
| H | -0.20070394 | -3.97019263 | 0.59522663  |
| C | 4.66993152  | -1.72110498 | 0.15859891  |
| C | -1.19120909 | -0.71916817 | 0.17383446  |
| C | 3.69277062  | -2.61398773 | -0.21115040 |

|   |             |             |             |
|---|-------------|-------------|-------------|
| H | 1.41066752  | -3.77202569 | -1.02806603 |
| H | 0.66026323  | -2.25262121 | -1.51420115 |
| S | -2.82568964 | -0.11368198 | 0.01606320  |
| C | -3.48531992 | -1.69844103 | 0.10852589  |
| C | -2.50321539 | -2.65292731 | 0.25305975  |
| H | -4.55963759 | -1.84468666 | 0.05995727  |
| H | -2.71939430 | -3.71729997 | 0.33506952  |
| H | 3.89956185  | -3.65883050 | -0.43837390 |
| H | 5.73592347  | -1.89181583 | 0.26781648  |

**F-COD (TS)**

$E = -3553.52$

$H = -3414.56$

$G = -3450.21$

$N_{\text{imag}} = 1, \nu = -92.5224 \text{ i cm}^{-1}$

|   |             |             |             |
|---|-------------|-------------|-------------|
| C | 2.23195205  | 2.83932073  | -1.23477447 |
| H | 3.25103576  | 2.43204690  | -1.23790076 |
| H | 2.27765438  | 3.93567276  | -1.34225527 |
| H | 1.67073246  | 2.41625533  | -2.07345039 |
| C | 2.22729414  | 2.93239263  | 1.22451139  |
| H | 2.26190976  | 4.03396972  | 1.25440582  |
| H | 3.25196009  | 2.53986848  | 1.25492457  |
| H | 1.67014099  | 2.56368847  | 2.09115343  |
| O | 0.24202236  | 2.87033588  | -0.00611672 |
| H | -0.23652510 | 1.92870107  | 0.02104752  |
| N | 1.56588766  | 2.45335983  | 0.01012737  |
| C | 1.21995651  | -2.50856212 | -0.64586999 |
| C | 0.15099784  | -2.65563602 | 0.52644759  |
| C | 1.13265055  | 0.28379980  | 0.09235519  |
| C | -1.12161555 | -1.90535905 | 0.31866132  |
| C | -0.12825502 | 0.26647871  | 0.09069565  |
| C | -1.27633845 | -0.57305286 | 0.14662199  |
| H | 0.71174637  | -2.07663313 | -1.51737547 |
| H | 0.62112800  | -2.32048680 | 1.45969783  |
| C | 2.40349831  | -1.66972730 | -0.30733951 |
| H | 1.57870935  | -3.50482258 | -0.92938996 |
| H | -0.10222062 | -3.71519920 | 0.64871859  |
| C | 2.39149208  | -0.35529038 | 0.01383700  |
| F | 3.58908819  | -2.34963397 | -0.25635154 |
| F | -2.23214198 | -2.70522364 | 0.27199697  |
| H | -2.28449405 | -0.17506663 | 0.02100484  |
| H | 3.32821886  | 0.14712107  | 0.25597297  |

**CF<sub>3</sub>-COD (TS)**

$E = -4355.56$

$H = -4197.38$

$G = -4242.41$

$N_{\text{imag}} = 1, \nu = -36.8323 \text{ i cm}^{-1}$

|   |             |             |             |
|---|-------------|-------------|-------------|
| C | 2.31907072  | 2.91567631  | -1.19204119 |
| H | 3.35359611  | 2.54964992  | -1.17185791 |
| H | 2.32652750  | 4.01651747  | -1.26325180 |
| H | 1.80692527  | 2.50191625  | -2.06650279 |
| C | 2.23892857  | 2.93022429  | 1.26031991  |
| H | 2.24165107  | 4.03180391  | 1.31925600  |
| H | 3.27322693  | 2.56619872  | 1.31117719  |
| H | 1.67127116  | 2.52611400  | 2.10453197  |
| O | 0.29254216  | 2.88366029  | -0.03001059 |
| H | -0.18989859 | 1.98292140  | -0.04372625 |
| N | 1.63046467  | 2.45911805  | 0.01578518  |
| C | 1.16208974  | -2.60797339 | -0.43717245 |
| C | 0.07899606  | -2.57636351 | 0.73419578  |
| C | 1.11055267  | 0.17965810  | 0.00343318  |
| C | -1.22436445 | -1.92837806 | 0.36451815  |
| C | -0.13997470 | 0.17561862  | -0.01021960 |
| C | -1.32043027 | -0.61196186 | 0.03641874  |
| H | 0.68711267  | -2.21352294 | -1.34420393 |
| H | 0.51113890  | -2.02413857 | 1.57796659  |
| C | 2.40232468  | -1.80318728 | -0.16963941 |
| H | 1.42858575  | -3.65052805 | -0.64089581 |
| H | -0.09560878 | -3.60188212 | 1.07667577  |
| C | 2.37114119  | -0.45408891 | 0.00080549  |
| C | 3.70055320  | -2.55125979 | -0.05999973 |
| C | -2.44246942 | -2.80934290 | 0.34593418  |
| H | -2.29124512 | -0.17730970 | -0.20019270 |
| H | 3.28975600  | 0.10572744  | 0.16741740  |
| F | -2.27711592 | -3.85420638 | -0.52642414 |
| F | -3.57841837 | -2.16227621 | -0.01822484 |
| F | -2.67971332 | -3.37166376 | 1.57163270  |
| F | 3.98223377  | -3.24485470 | -1.20529414 |
| F | 3.65101075  | -3.47984127 | 0.94606404  |
| F | 4.76985958  | -1.75016978 | 0.18945581  |

---
